# Supplementary material for: A proteomic analysis of chondrogenic, osteogenic and tenogenic constructs from ageing mesenchymal stem cells
Source: Stem Cell Res Ther. 2016 Sep 14;7(1):133. doi: 10.1186/s13287-016-0384-2 (PMC5022190; doi:10.1186/s13287-016-0384-2)
Supplement: Additional file 7: Table S6. — Complete list of significantly expressed proteins and DAVID analysis of the expression patterns. (XLSX 297 kb) [file 13287_2016_384_MOESM7_ESM.xlsx]

## Sheet: Key
Complete list of significantly sxpressed proteins and DAVID analysis of the expression patterns.
Significant differnentially expressed proteins due to age of MSCs used to form constructs for chondrogenic and tenogenic have a 2 fold change and q<0.05. For osteogenic the filters used were 2 fold change and p<0.05.
Tab 1-3. The first set of tabs relate to the DAVID results for functional annotation cluster analysis. Significant results (enrichment score >=1.3) are marked in green.
Tab4-6. The second set of tabs relate to the DAVID results for GO term Bpfat. Significant results (Bonferroni <0.05) are marked in green.

## Sheet: Chondrogenic
Annotation Cluster 1	Enrichment Score: 5.531507024030629
Category	Term	Count	%	PValue	Genes	List Total	Pop Hits	Pop Total	Fold Enrichment	Bonferroni	Benjamini	FDR
GOTERM_BP_FAT	GO:0007155~cell adhesion	19	17.1171	9.07514e-07	826111, 823371, 784977, 802187, 778543, 814479, 794878, 789359, 820867, 813535, 775692, 825565, 800485, 811688, 780448, 817654, 782974, 791411, 784099	93	700	13528	3.94826	0.00130687	0.00065365	0.00150054
GOTERM_BP_FAT	GO:0022610~biological adhesion	19	17.1171	9.2642e-07	826111, 823371, 784977, 802187, 778543, 814479, 794878, 789359, 820867, 813535, 775692, 825565, 800485, 811688, 780448, 817654, 782974, 791411, 784099	93	701	13528	3.94263	0.00133408	0.000444891	0.0015318
SP_PIR_KEYWORDS	cell adhesion	12	10.8108	3.02564e-05	775692, 823371, 826111, 778543, 802187, 784977, 814479, 780448, 782974, 817654, 820867, 784099	111	422	19235	4.92763	0.00798602	0.000616585	0.0396589
Annotation Cluster 2	Enrichment Score: 4.756830630930827
Category	Term	Count	%	PValue	Genes	List Total	Pop Hits	Pop Total	Fold Enrichment	Bonferroni	Benjamini	FDR
GOTERM_BP_FAT	GO:0030036~actin cytoskeleton organization	11	9.90991	3.02483e-06	795963, 804583, 795829, 784977, 778146, 788771, 784611, 794878, 783768, 789056, 813535	93	226	13528	7.08003	0.00434931	0.000544701	0.00500136
GOTERM_BP_FAT	GO:0030029~actin filament-based process	11	9.90991	5.36003e-06	795963, 804583, 795829, 784977, 778146, 788771, 784611, 794878, 783768, 789056, 813535	93	241	13528	6.63936	0.00769407	0.000701919	0.00886228
GOTERM_BP_FAT	GO:0007010~cytoskeleton organization	14	12.6126	7.45294e-06	804583, 795829, 784977, 788771, 783768, 789056, 794878, 813535, 795963, 778146, 801728, 784611, 791615, 804233	93	436	13528	4.67081	0.0106823	0.000715726	0.0123225
GOTERM_CC_FAT	GO:0031252~cell leading edge	7	6.30631	0.000777107	795963, 775740, 795829, 784977, 788771, 794878, 782974	102	138	12782	6.35649	0.176632	0.0213632	1.00485
Annotation Cluster 3	Enrichment Score: 3.912679811263698
Category	Term	Count	%	PValue	Genes	List Total	Pop Hits	Pop Total	Fold Enrichment	Bonferroni	Benjamini	FDR
SP_PIR_KEYWORDS	signal	42	37.8378	2.33971e-07	800376, 809292, 823371, 806556, 825863, 802187, 785547, 814479, 822806, 820867, 794018, 801761, 780030, 809797, 796685, 780448, 787982, 806127, 810395, 823969, 793612, 818276, 794781, 794153, 826111, 784977, 774025, 807686, 775692, 825565, 821192, 800485, 777548, 826073, 814755, 821489, 817654, 803417, 804645, 784099, 804233, 787908	111	3250	19235	2.23942	6.20003e-05	2.06672e-05	0.000306735
UP_SEQ_FEATURE	signal peptide	42	37.8378	2.78933e-07	800376, 809292, 823371, 806556, 825863, 802187, 785547, 814479, 822806, 820867, 794018, 801761, 780030, 809797, 796685, 780448, 787982, 806127, 810395, 823969, 793612, 818276, 794781, 794153, 826111, 784977, 774025, 807686, 775692, 825565, 821192, 800485, 777548, 826073, 814755, 821489, 817654, 803417, 804645, 784099, 804233, 787908	111	3250	19113	2.22521	0.000204437	0.000204437	0.000423241
SP_PIR_KEYWORDS	disulfide bond	33	29.7297	0.000148534	800376, 809292, 823371, 785547, 820867, 794018, 801728, 801761, 780030, 809797, 796685, 791615, 780448, 787982, 806127, 803569, 793612, 794781, 794153, 826111, 784977, 775692, 825565, 800485, 777548, 826073, 814755, 817654, 821489, 803417, 804645, 784099, 787908	111	2924	19235	1.95572	0.0385998	0.00245726	0.194553
GOTERM_CC_FAT	GO:0044421~extracellular region part	20	18.018	0.000161761	794781, 800376, 794153, 823371, 814479, 794018, 775692, 825565, 800485, 801761, 780030, 814755, 791615, 780448, 817654, 804645, 787908, 810395, 804233, 784099	102	960	12782	2.6107	0.0396365	0.00671791	0.209939
UP_SEQ_FEATURE	disulfide bond	32	28.8288	0.000201661	800376, 809292, 823371, 785547, 820867, 794018, 801728, 801761, 780030, 809797, 796685, 791615, 780448, 787982, 806127, 803569, 794781, 794153, 826111, 784977, 775692, 825565, 800485, 777548, 826073, 814755, 817654, 821489, 803417, 804645, 784099, 787908	111	2819	19113	1.95461	0.137424	0.0243377	0.305555
UP_SEQ_FEATURE	glycosylation site:N-linked (GlcNAc...)	40	36.036	0.00058363	800376, 823371, 806556, 825863, 802187, 785547, 814479, 789359, 820867, 794018, 801761, 780030, 809797, 796685, 812322, 780448, 806127, 810395, 803569, 793612, 818276, 794781, 794153, 826111, 784977, 798274, 807686, 775692, 807973, 825565, 821192, 800485, 777548, 826073, 814755, 821489, 817654, 804645, 784099, 787908	111	4129	19113	1.6681	0.34814	0.0520853	0.881924
SP_PIR_KEYWORDS	glycoprotein	41	36.9369	0.000626901	800376, 823371, 806556, 802187, 825863, 785547, 814479, 789359, 820867, 794018, 801761, 780030, 809797, 796685, 812322, 780448, 806127, 810395, 803569, 793612, 818276, 794781, 794153, 826111, 784977, 798274, 807686, 775692, 807973, 825565, 821192, 800485, 777548, 826073, 814755, 821489, 817654, 804645, 804233, 784099, 787908	111	4318	19235	1.6454	0.153107	0.00788214	0.818754
SP_PIR_KEYWORDS	Secreted	21	18.9189	0.00134129	794781, 800376, 794153, 823371, 785547, 794018, 775692, 825565, 785252, 800485, 801761, 780030, 809797, 814755, 780448, 804645, 787908, 784099, 804233, 810395, 803569	111	1689	19235	2.15456	0.299303	0.0153454	1.74422
GOTERM_CC_FAT	GO:0005576~extracellular region	24	21.6216	0.0393586	794781, 800376, 794153, 823371, 785547, 814479, 794018, 775692, 825565, 800485, 777548, 801761, 780030, 809797, 814755, 791615, 780448, 817654, 804645, 787908, 784099, 804233, 803569, 810395	102	2010	12782	1.49628	0.999956	0.199948	40.6453
Annotation Cluster 4	Enrichment Score: 3.8299120414472805
Category	Term	Count	%	PValue	Genes	List Total	Pop Hits	Pop Total	Fold Enrichment	Bonferroni	Benjamini	FDR
GOTERM_CC_FAT	GO:0000267~cell fraction	23	20.7207	2.97918e-05	818836, 797658, 794781, 775740, 784977, 798274, 783247, 814479, 799578, 789359, 816597, 795963, 785252, 795339, 780512, 784611, 812322, 826073, 820495, 787982, 782974, 821489, 797855	102	1083	12782	2.66133	0.0074204	0.0074204	0.0386955
GOTERM_CC_FAT	GO:0005624~membrane fraction	19	17.1171	5.62177e-05	818836, 797658, 775740, 784977, 798274, 783247, 814479, 789359, 816597, 795963, 795339, 780512, 784611, 812322, 826073, 787982, 782974, 821489, 797855	102	809	12782	2.94309	0.0139565	0.00700278	0.0730076
GOTERM_CC_FAT	GO:0005626~insoluble fraction	19	17.1171	8.98593e-05	818836, 797658, 775740, 784977, 798274, 783247, 814479, 789359, 816597, 795963, 795339, 780512, 784611, 812322, 826073, 787982, 782974, 821489, 797855	102	839	12782	2.83786	0.0222154	0.00560072	0.116673
GOTERM_CC_FAT	GO:0042598~vesicular fraction	8	7.20721	0.00318287	795963, 818836, 797658, 795339, 798274, 783247, 787982, 821489	102	244	12782	4.10865	0.549315	0.0485914	4.05686
Annotation Cluster 5	Enrichment Score: 3.188345264658495
Category	Term	Count	%	PValue	Genes	List Total	Pop Hits	Pop Total	Fold Enrichment	Bonferroni	Benjamini	FDR
GOTERM_BP_FAT	GO:0016044~membrane organization	14	12.6126	1.70395e-06	795829, 783768, 820867, 816597, 795963, 801761, 811688, 826073, 791615, 817654, 806127, 803569, 804233, 784099	93	381	13528	5.34507	0.00245238	0.000490959	0.0028174
GOTERM_BP_FAT	GO:0006897~endocytosis	10	9.00901	1.82243e-05	795829, 801761, 811688, 826073, 817654, 820867, 806127, 784099, 804233, 803569	93	220	13528	6.61193	0.0259196	0.00138123	0.030129
GOTERM_BP_FAT	GO:0010324~membrane invagination	10	9.00901	1.82243e-05	795829, 801761, 811688, 826073, 817654, 820867, 806127, 784099, 804233, 803569	93	220	13528	6.61193	0.0259196	0.00138123	0.030129
GOTERM_BP_FAT	GO:0016192~vesicle-mediated transport	14	12.6126	0.000133991	818836, 795829, 783768, 820867, 807973, 812705, 801761, 811688, 826073, 817654, 806127, 803569, 804233, 784099	93	576	13528	3.53554	0.175595	0.00550177	0.221319
GOTERM_BP_FAT	GO:0043277~apoptotic cell clearance	3	2.7027	0.000674168	826073, 817654, 820867	93	6	13528	72.7312	0.6216	0.0192484	1.1089
GOTERM_CC_FAT	GO:0009897~external side of plasma membrane	7	6.30631	0.00226574	826111, 814479, 826073, 817654, 820867, 784099, 804233	102	170	12782	5.15998	0.432819	0.0370995	2.90376
GOTERM_BP_FAT	GO:0006909~phagocytosis	4	3.6036	0.00422003	826073, 817654, 820867, 784099	93	48	13528	12.1219	0.997743	0.0707903	6.75359
GOTERM_MF_FAT	GO:0032403~protein complex binding	6	5.40541	0.014453	775692, 826111, 784977, 814479, 817654, 784099	96	196	12983	4.13999	0.991058	0.325024	17.8667
GOTERM_CC_FAT	GO:0009986~cell surface	8	7.20721	0.0202586	826111, 784977, 814479, 826073, 817654, 820867, 784099, 804233	102	348	12782	2.88078	0.994004	0.120073	23.347
UP_SEQ_FEATURE	short sequence motif:Cell attachment site	3	2.7027	0.0913804	814479, 817654, 784099	111	88	19113	5.87009	1	0.952831	76.6382
Annotation Cluster 6	Enrichment Score: 3.0009120660599735
Category	Term	Count	%	PValue	Genes	List Total	Pop Hits	Pop Total	Fold Enrichment	Bonferroni	Benjamini	FDR
SP_PIR_KEYWORDS	plasma	7	6.30631	1.55185e-05	794018, 794781, 794153, 801761, 780030, 787908, 804233	111	93	19235	13.0432	0.00410398	0.000456831	0.0203428
GOTERM_BP_FAT	GO:0050766~positive regulation of phagocytosis	4	3.6036	6.40579e-05	794018, 826111, 801761, 784099	93	12	13528	48.4875	0.088178	0.00307229	0.105865
GOTERM_BP_FAT	GO:0050764~regulation of phagocytosis	4	3.6036	0.00015987	794018, 826111, 801761, 784099	93	16	13528	36.3656	0.205778	0.00620746	0.264013
GOTERM_BP_FAT	GO:0032101~regulation of response to external stimulus	7	6.30631	0.000743885	794018, 794781, 826111, 801761, 817654, 787908, 804233	93	159	13528	6.404	0.657792	0.0208067	1.22291
GOTERM_BP_FAT	GO:0045807~positive regulation of endocytosis	4	3.6036	0.000978504	794018, 826111, 801761, 784099	93	29	13528	20.0638	0.756031	0.0248767	1.60569
GOTERM_BP_FAT	GO:0050727~regulation of inflammatory response	5	4.5045	0.00176885	794018, 826111, 801761, 787908, 804233	93	76	13528	9.56989	0.922009	0.0384885	2.8849
GOTERM_BP_FAT	GO:0060627~regulation of vesicle-mediated transport	5	4.5045	0.004132	794018, 826111, 801761, 811688, 784099	93	96	13528	7.57616	0.997437	0.0701786	6.6172
GOTERM_BP_FAT	GO:0051130~positive regulation of cellular component organization	6	5.40541	0.00781539	794018, 804583, 826111, 801761, 791411, 784099	93	181	13528	4.82196	0.999988	0.104923	12.167
GOTERM_BP_FAT	GO:0030100~regulation of endocytosis	4	3.6036	0.00824182	794018, 826111, 801761, 784099	93	61	13528	9.53852	0.999993	0.109332	12.7891
GOTERM_BP_FAT	GO:0051050~positive regulation of transport	6	5.40541	0.0179803	794018, 794781, 826111, 801761, 784099, 804233	93	223	13528	3.91379	1	0.182184	25.9185
Annotation Cluster 7	Enrichment Score: 2.864020986088594
Category	Term	Count	%	PValue	Genes	List Total	Pop Hits	Pop Total	Fold Enrichment	Bonferroni	Benjamini	FDR
SP_PIR_KEYWORDS	endoplasmic reticulum	17	15.3153	2.9187e-06	793612, 818276, 805447, 809292, 806556, 798274, 822806, 807686, 807973, 780512, 790389, 796685, 821489, 787982, 819944, 803417, 823969	111	713	19235	4.1317	0.000773158	0.000110488	0.00382635
GOTERM_CC_FAT	GO:0044432~endoplasmic reticulum part	12	10.8108	9.02755e-05	793612, 809292, 806556, 780512, 798274, 790389, 787982, 821489, 812401, 819944, 803417, 823969	102	347	12782	4.33362	0.0223171	0.0045038	0.117213
GOTERM_CC_FAT	GO:0005783~endoplasmic reticulum	19	17.1171	0.00047561	793612, 818836, 818276, 805447, 809292, 806556, 798274, 822806, 807686, 807973, 780512, 790389, 796685, 812401, 821489, 787982, 819944, 803417, 823969	102	960	12782	2.48017	0.112131	0.0147564	0.616104
GOTERM_CC_FAT	GO:0005789~endoplasmic reticulum membrane	8	7.20721	0.00541624	806556, 780512, 798274, 790389, 821489, 812401, 819944, 803417	102	269	12782	3.7268	0.742759	0.0573236	6.81221
GOTERM_CC_FAT	GO:0042175~nuclear envelope-endoplasmic reticulum network	8	7.20721	0.00722822	806556, 780512, 798274, 790389, 821489, 812401, 819944, 803417	102	284	12782	3.52996	0.836937	0.0699758	8.9938
GOTERM_CC_FAT	GO:0012505~endomembrane system	13	11.7117	0.0201763	797658, 806556, 798274, 822806, 813535, 795963, 780512, 790389, 826073, 812401, 821489, 819944, 803417	102	782	12782	2.08322	0.993877	0.122482	23.2632
GOTERM_CC_FAT	GO:0031090~organelle membrane	14	12.6126	0.0904216	806556, 798274, 783247, 822806, 816597, 813535, 795963, 795339, 780512, 790389, 812401, 821489, 819944, 803417	102	1096	12782	1.60072	1	0.340106	70.806
Annotation Cluster 8	Enrichment Score: 2.82042168471257
Category	Term	Count	%	PValue	Genes	List Total	Pop Hits	Pop Total	Fold Enrichment	Bonferroni	Benjamini	FDR
GOTERM_BP_FAT	GO:0010033~response to organic substance	18	16.2162	6.14066e-06	818836, 794153, 818352, 826111, 792654, 784511, 822682, 801761, 780030, 791615, 821489, 817654, 820495, 787908, 810395, 803569, 804233, 784099	93	721	13528	3.63152	0.00880968	0.000737121	0.0101529
GOTERM_BP_FAT	GO:0009719~response to endogenous stimulus	10	9.00901	0.0017132	818352, 826111, 784511, 801761, 822682, 817654, 820495, 787908, 784099, 810395	93	405	13528	3.59166	0.915486	0.0378711	2.79534
GOTERM_BP_FAT	GO:0009725~response to hormone stimulus	9	8.10811	0.00348733	818352, 826111, 784511, 801761, 822682, 817654, 787908, 784099, 810395	93	367	13528	3.5672	0.993487	0.0602567	5.61262
GOTERM_BP_FAT	GO:0048545~response to steroid hormone stimulus	4	3.6036	0.142494	817654, 787908, 784099, 810395	93	192	13528	3.03047	1	0.65176	92.1278
Annotation Cluster 9	Enrichment Score: 2.6564818859279344
Category	Term	Count	%	PValue	Genes	List Total	Pop Hits	Pop Total	Fold Enrichment	Bonferroni	Benjamini	FDR
SP_PIR_KEYWORDS	duplication	12	10.8108	7.76777e-08	794781, 809326, 818676, 784977, 801761, 780030, 799578, 812322, 790215, 779157, 820867, 804233	111	228	19235	9.12044	2.05844e-05	1.02922e-05	0.000101835
GOTERM_BP_FAT	GO:0000904~cell morphogenesis involved in differentiation	13	11.7117	9.16564e-08	775740, 823371, 788771, 794878, 783768, 790215, 779157, 795963, 809326, 800485, 818676, 811688, 791615	93	244	13528	7.75004	0.000132068	0.000132068	0.000151551
UP_SEQ_FEATURE	compositionally biased region:Lys-rich (highly basic)	4	3.6036	7.38851e-07	809326, 818676, 790215, 779157	111	4	19113	172.189	0.000541431	0.000270752	0.0011211
UP_SEQ_FEATURE	chain:Ubiquitin	4	3.6036	7.38851e-07	809326, 818676, 790215, 779157	111	4	19113	172.189	0.000541431	0.000270752	0.0011211
UP_SEQ_FEATURE	chain:40S ribosomal protein S27a	4	3.6036	7.38851e-07	809326, 818676, 790215, 779157	111	4	19113	172.189	0.000541431	0.000270752	0.0011211
UP_SEQ_FEATURE	site:Essential for function	4	3.6036	7.38851e-07	809326, 818676, 790215, 779157	111	4	19113	172.189	0.000541431	0.000270752	0.0011211
INTERPRO	IPR001975:Ribosomal protein L40e	4	3.6036	1.05499e-06	809326, 818676, 790215, 779157	109	4	16659	152.835	0.000337539	0.000337539	0.00142364
INTERPRO	IPR002906:Ribosomal protein S27a	4	3.6036	1.05499e-06	809326, 818676, 790215, 779157	109	4	16659	152.835	0.000337539	0.000337539	0.00142364
GOTERM_BP_FAT	GO:0048667~cell morphogenesis involved in neuron differentiation	11	9.90991	1.49555e-06	795963, 775740, 809326, 818676, 800485, 788771, 811688, 783768, 791615, 790215, 779157	93	209	13528	7.65591	0.00215277	0.000538628	0.00247282
SP_PIR_KEYWORDS	polyprotein	4	3.6036	1.80469e-06	809326, 818676, 790215, 779157	111	5	19235	138.631	0.000478129	9.56441e-05	0.00236592
SP_PIR_KEYWORDS	thiolester bond	6	5.40541	1.82688e-06	794018, 809326, 818676, 790215, 779157, 787908	111	36	19235	28.8814	0.000484007	8.06842e-05	0.00239502
UP_SEQ_FEATURE	binding site:Activating enzyme	4	3.6036	1.83937e-06	809326, 818676, 790215, 779157	111	5	19113	137.751	0.00134735	0.00044932	0.00279095
GOTERM_BP_FAT	GO:0032989~cellular component morphogenesis	14	12.6126	2.68552e-06	775740, 823371, 784977, 788771, 794878, 783768, 790215, 779157, 795963, 809326, 800485, 818676, 811688, 791615	93	397	13528	5.12966	0.00386237	0.000644766	0.00444034
GOTERM_BP_FAT	GO:0042062~long-term strengthening of neuromuscular junction	4	3.6036	3.01419e-06	809326, 818676, 790215, 779157	93	5	13528	116.37	0.00433403	0.000620301	0.00498376
PIR_SUPERFAMILY	PIRSF038431:ribosomal protein S27Ae	4	3.6036	3.36856e-06	809326, 818676, 790215, 779157	72	4	7396	102.722	0.000289655	0.000289655	0.00363236
PIR_SUPERFAMILY	PIRSF002042:polyubiquitin 3	4	3.6036	3.36856e-06	809326, 818676, 790215, 779157	72	4	7396	102.722	0.000289655	0.000289655	0.00363236
GOTERM_BP_FAT	GO:0006928~cell motion	15	13.5135	3.66141e-06	826111, 823371, 784977, 814479, 788771, 783768, 794878, 790215, 779157, 795963, 775692, 809326, 800485, 818676, 817654	93	475	13528	4.59355	0.00526221	0.000586062	0.00605387
SP_PIR_KEYWORDS	protein degradation	5	4.5045	3.67296e-06	809326, 818676, 790625, 790215, 779157	111	19	19235	45.6022	0.000972864	0.00012166	0.00481515
GOTERM_BP_FAT	GO:0000902~cell morphogenesis	13	11.7117	5.01104e-06	775740, 823371, 788771, 794878, 783768, 790215, 779157, 795963, 809326, 800485, 818676, 811688, 791615	93	356	13528	5.31183	0.00719492	0.000721832	0.00828529
GOTERM_BP_FAT	GO:0031646~positive regulation of neurological system process	6	5.40541	6.2529e-06	809326, 818676, 826111, 780030, 790215, 779157	93	39	13528	22.3788	0.00896999	0.000692872	0.0103385
GOTERM_BP_FAT	GO:0007409~axonogenesis	10	9.00901	6.36314e-06	795963, 775740, 809326, 818676, 800485, 788771, 811688, 783768, 790215, 779157	93	193	13528	7.53691	0.00912741	0.000654737	0.0105207
GOTERM_BP_FAT	GO:0008582~regulation of synaptic growth at neuromuscular junction	4	3.6036	1.04459e-05	809326, 818676, 790215, 779157	93	7	13528	83.1214	0.0149398	0.000940343	0.0172705
GOTERM_BP_FAT	GO:0048812~neuron projection morphogenesis	10	9.00901	1.40839e-05	795963, 775740, 809326, 818676, 800485, 788771, 811688, 783768, 790215, 779157	93	213	13528	6.82922	0.0200906	0.00119312	0.0232849
GOTERM_BP_FAT	GO:0048638~regulation of developmental growth	6	5.40541	1.59603e-05	809326, 818676, 790215, 779157, 819944, 804233	93	47	13528	18.5697	0.0227365	0.0012769	0.0263866
PIR_SUPERFAMILY	PIRSF002034:ubiquitin	4	3.6036	1.66114e-05	809326, 818676, 790215, 779157	72	6	7396	68.4815	0.00142757	0.000714039	0.0179111
SP_PIR_KEYWORDS	RNA binding	5	4.5045	1.86479e-05	809326, 818676, 790215, 779157, 821689	111	28	19235	30.9443	0.00492956	0.000494053	0.0244446
GOTERM_BP_FAT	GO:0030433~ER-associated protein catabolic process	5	4.5045	1.9179e-05	818836, 809326, 818676, 790215, 779157	93	24	13528	30.3047	0.0272587	0.0013809	0.0317071
SP_PIR_KEYWORDS	pseudogene	4	3.6036	2.12086e-05	809326, 818676, 790215, 779157	111	10	19235	69.3153	0.00560458	0.00051081	0.0278009
UP_SEQ_FEATURE	cross-link:Glycyl lysine isopeptide (Gly-Lys) (interchain with K-? in acceptor proteins)	4	3.6036	2.95937e-05	809326, 818676, 790215, 779157	111	11	19113	62.6143	0.0214589	0.00432911	0.0448949
GOTERM_BP_FAT	GO:0032269~negative regulation of cellular protein metabolic process	9	8.10811	3.02095e-05	809326, 818676, 814479, 822682, 790215, 817654, 779157, 820867, 787908	93	180	13528	7.27312	0.0425986	0.0019768	0.0499388
GOTERM_BP_FAT	GO:0030030~cell projection organization	12	10.8108	3.88629e-05	795963, 775740, 809326, 818676, 800485, 788771, 811688, 794878, 783768, 791615, 790215, 779157	93	368	13528	4.74334	0.0544632	0.00243193	0.0642393
GOTERM_BP_FAT	GO:0051248~negative regulation of protein metabolic process	9	8.10811	3.96726e-05	809326, 818676, 814479, 822682, 790215, 817654, 779157, 820867, 787908	93	187	13528	7.00086	0.0555659	0.00237922	0.0655773
GOTERM_BP_FAT	GO:0051240~positive regulation of multicellular organismal process	10	9.00901	4.11829e-05	794781, 809326, 818676, 826111, 801761, 780030, 791615, 790215, 817654, 779157	93	244	13528	5.96157	0.0576191	0.00237102	0.0680729
INTERPRO	IPR019956:Ubiquitin subgroup	4	3.6036	4.20997e-05	809326, 818676, 790215, 779157	109	11	16659	55.5763	0.0133818	0.00671345	0.0567963
GOTERM_BP_FAT	GO:0048858~cell projection morphogenesis	10	9.00901	4.2517e-05	795963, 775740, 809326, 818676, 800485, 788771, 811688, 783768, 790215, 779157	93	245	13528	5.93724	0.0594291	0.0023537	0.0702774
GOTERM_BP_FAT	GO:0031175~neuron projection development	10	9.00901	5.97781e-05	795963, 775740, 809326, 818676, 800485, 788771, 811688, 783768, 790215, 779157	93	256	13528	5.68212	0.0825368	0.0030718	0.0987955
GOTERM_BP_FAT	GO:0032990~cell part morphogenesis	10	9.00901	5.97781e-05	795963, 775740, 809326, 818676, 800485, 788771, 811688, 783768, 790215, 779157	93	256	13528	5.68212	0.0825368	0.0030718	0.0987955
GOTERM_BP_FAT	GO:0051969~regulation of transmission of nerve impulse	8	7.20721	6.28171e-05	809326, 818676, 826111, 811688, 780030, 790215, 779157, 804233	93	147	13528	7.91632	0.086546	0.00311659	0.103816
GOTERM_BP_FAT	GO:0031644~regulation of neurological system process	8	7.20721	8.08893e-05	809326, 818676, 826111, 811688, 780030, 790215, 779157, 804233	93	153	13528	7.60588	0.110029	0.00375314	0.133664
GOTERM_BP_FAT	GO:0032268~regulation of cellular protein metabolic process	13	11.7117	8.47557e-05	794781, 826111, 814479, 790215, 822682, 779157, 820867, 809326, 818676, 782385, 817654, 804233, 787908	93	474	13528	3.98947	0.114974	0.00380954	0.140049
GOTERM_BP_FAT	GO:0048666~neuron development	11	9.90991	9.96933e-05	795963, 775740, 809326, 818676, 800485, 788771, 811688, 783768, 791615, 790215, 779157	93	339	13528	4.72002	0.133822	0.00434403	0.164712
SP_PIR_KEYWORDS	protein biosynthesis	8	7.20721	0.000103842	809326, 785252, 818676, 822682, 790215, 782385, 820495, 779157	111	188	19235	7.37397	0.0271443	0.00183295	0.136051
GOTERM_BP_FAT	GO:0051971~positive regulation of transmission of nerve impulse	5	4.5045	0.000111417	809326, 818676, 826111, 790215, 779157	93	37	13528	19.6571	0.148334	0.00471125	0.184066
GOTERM_BP_FAT	GO:0032270~positive regulation of cellular protein metabolic process	9	8.10811	0.000184239	794781, 809326, 818676, 826111, 814479, 790215, 817654, 779157, 804233	93	233	13528	5.61872	0.233188	0.00696285	0.304199
GOTERM_BP_FAT	GO:0051963~regulation of synaptogenesis	4	3.6036	0.000230669	809326, 818676, 790215, 779157	93	18	13528	32.325	0.282823	0.00848768	0.380722
GOTERM_BP_FAT	GO:0051247~positive regulation of protein metabolic process	9	8.10811	0.000245244	794781, 809326, 818676, 826111, 814479, 790215, 817654, 779157, 804233	93	243	13528	5.3875	0.297732	0.00879709	0.404733
GOTERM_BP_FAT	GO:0044057~regulation of system process	10	9.00901	0.000248365	809326, 825519, 818676, 826111, 811688, 780030, 791615, 790215, 779157, 804233	93	309	13528	4.70752	0.300884	0.00869221	0.409873
GOTERM_BP_FAT	GO:0050807~regulation of synapse organization	4	3.6036	0.000370453	809326, 818676, 790215, 779157	93	21	13528	27.7071	0.413699	0.01234	0.610774
GOTERM_BP_FAT	GO:0044087~regulation of cellular component biogenesis	7	6.30631	0.0004091	809326, 804583, 818676, 811688, 790215, 817654, 779157	93	142	13528	7.17068	0.445469	0.0133114	0.674289
GOTERM_BP_FAT	GO:0006916~anti-apoptosis	8	7.20721	0.000503019	809326, 818676, 792654, 791615, 790215, 817654, 779157, 804233	93	206	13528	5.64902	0.515692	0.0159827	0.828486
GOTERM_BP_FAT	GO:0050803~regulation of synapse structure and activity	4	3.6036	0.000555494	809326, 818676, 790215, 779157	93	24	13528	24.2437	0.550981	0.0168917	0.914541
GOTERM_BP_FAT	GO:0048742~regulation of skeletal muscle fiber development	4	3.6036	0.000628146	809326, 818676, 790215, 779157	93	25	13528	23.274	0.595637	0.0183088	1.03357
UP_SEQ_FEATURE	zinc finger region:C4-type	5	4.5045	0.000637133	809326, 818676, 784511, 790215, 779157	111	68	19113	12.661	0.373225	0.0505833	0.962407
GOTERM_BP_FAT	GO:0030182~neuron differentiation	11	9.90991	0.000768882	795963, 775740, 809326, 818676, 800485, 788771, 811688, 783768, 791615, 790215, 779157	93	438	13528	3.65316	0.669909	0.0210895	1.26376
GOTERM_BP_FAT	GO:0007411~axon guidance	6	5.40541	0.000802998	809326, 818676, 788771, 783768, 790215, 779157	93	107	13528	8.15677	0.685756	0.0216044	1.31949
GOTERM_BP_FAT	GO:0048167~regulation of synaptic plasticity	5	4.5045	0.000931977	809326, 818676, 790215, 779157, 804233	93	64	13528	11.3642	0.739097	0.0241332	1.52989
GOTERM_BP_FAT	GO:0048641~regulation of skeletal muscle tissue development	4	3.6036	0.000978504	809326, 818676, 790215, 779157	93	29	13528	20.0638	0.756031	0.0248767	1.60569
GOTERM_BP_FAT	GO:0042981~regulation of apoptosis	15	13.5135	0.00101767	818836, 794781, 809292, 792654, 790215, 779157, 809326, 818676, 784611, 791615, 787982, 817654, 820495, 819944, 804233	93	804	13528	2.71385	0.769433	0.0254121	1.66946
GOTERM_BP_FAT	GO:0043067~regulation of programmed cell death	15	13.5135	0.0011194	818836, 794781, 809292, 792654, 790215, 779157, 809326, 818676, 784611, 791615, 787982, 817654, 820495, 819944, 804233	93	812	13528	2.68711	0.800903	0.0274434	1.8349
GOTERM_BP_FAT	GO:0010941~regulation of cell death	15	13.5135	0.00115971	818836, 794781, 809292, 792654, 790215, 779157, 809326, 818676, 784611, 791615, 787982, 817654, 820495, 819944, 804233	93	815	13528	2.67722	0.812149	0.0274837	1.90036
GOTERM_BP_FAT	GO:0051153~regulation of striated muscle cell differentiation	4	3.6036	0.00130881	809326, 818676, 790215, 779157	93	32	13528	18.1828	0.84851	0.0299807	2.14223
INTERPRO	IPR019954:Ubiquitin conserved site	4	3.6036	0.00136991	809326, 818676, 790215, 779157	109	34	16659	17.9806	0.355108	0.0705034	1.83289
GOTERM_BP_FAT	GO:0050806~positive regulation of synaptic transmission	4	3.6036	0.0015636	809326, 818676, 790215, 779157	93	34	13528	17.1132	0.895117	0.0351593	2.55421
GOTERM_BP_FAT	GO:0010647~positive regulation of cell communication	9	8.10811	0.00177694	809326, 818676, 826111, 814479, 790215, 817654, 779157, 791411, 813535	93	329	13528	3.97921	0.922915	0.0380868	2.89792
SP_PIR_KEYWORDS	zinc finger	6	5.40541	0.0018672	809326, 818676, 784511, 790215, 779157, 826487	111	153	19235	6.79562	0.390593	0.0196158	2.42041
GOTERM_BP_FAT	GO:0051960~regulation of nervous system development	7	6.30631	0.00196163	809326, 818676, 780030, 790215, 779157, 819944, 804233	93	192	13528	5.30332	0.940957	0.0413518	3.19454
GOTERM_BP_FAT	GO:0040008~regulation of growth	9	8.10811	0.00222212	775692, 809326, 818676, 809797, 791615, 790215, 779157, 819944, 804233	93	341	13528	3.83918	0.959467	0.0453957	3.61146
GOTERM_BP_FAT	GO:0051147~regulation of muscle cell differentiation	4	3.6036	0.00233018	809326, 818676, 790215, 779157	93	39	13528	14.9192	0.965324	0.0468894	3.78393
GOTERM_BP_FAT	GO:0050804~regulation of synaptic transmission	6	5.40541	0.00233066	809326, 818676, 811688, 790215, 779157, 804233	93	136	13528	6.41746	0.965348	0.0462538	3.78469
GOTERM_BP_FAT	GO:0006915~apoptosis	12	10.8108	0.00252031	818836, 794781, 809326, 809292, 818676, 784611, 791615, 787982, 790215, 817654, 779157, 819944	93	602	13528	2.89958	0.973652	0.0485927	4.08667
GOTERM_BP_FAT	GO:0060284~regulation of cell development	7	6.30631	0.002723	809326, 818676, 790215, 779157, 791411, 819944, 804233	93	205	13528	4.96701	0.980341	0.0517122	4.40842
GOTERM_BP_FAT	GO:0043085~positive regulation of catalytic activity	11	9.90991	0.00275773	818836, 794781, 809326, 818676, 826111, 791615, 826073, 790215, 817654, 779157, 804233	93	520	13528	3.07709	0.981303	0.051013	4.46344
GOTERM_BP_FAT	GO:0043066~negative regulation of apoptosis	9	8.10811	0.00279907	809326, 818676, 792654, 791615, 790215, 817654, 820495, 779157, 804233	93	354	13528	3.6982	0.982387	0.051104	4.52891
GOTERM_BP_FAT	GO:0012501~programmed cell death	12	10.8108	0.00282616	818836, 794781, 809326, 809292, 818676, 784611, 791615, 787982, 790215, 817654, 779157, 819944	93	611	13528	2.85687	0.983063	0.050942	4.57178
GOTERM_BP_FAT	GO:0043069~negative regulation of programmed cell death	9	8.10811	0.00304988	809326, 818676, 792654, 791615, 790215, 817654, 820495, 779157, 804233	93	359	13528	3.64669	0.987742	0.0541926	4.92516
GOTERM_BP_FAT	GO:0060548~negative regulation of cell death	9	8.10811	0.00310208	809326, 818676, 792654, 791615, 790215, 817654, 820495, 779157, 804233	93	360	13528	3.63656	0.988633	0.0544259	5.00745
INTERPRO	IPR000626:Ubiquitin	4	3.6036	0.00328491	809326, 818676, 790215, 779157	109	46	16659	13.29	0.651077	0.110405	4.34298
SMART	SM00213:UBQ	4	3.6036	0.00373572	809326, 818676, 790215, 779157	63	46	9079	12.5314	0.241916	0.088187	3.84165
GOTERM_CC_FAT	GO:0022627~cytosolic small ribosomal subunit	4	3.6036	0.00382721	809326, 818676, 790215, 779157	102	40	12782	12.5314	0.616586	0.0468013	4.85941
GOTERM_CC_FAT	GO:0022626~cytosolic ribosome	5	4.5045	0.00383642	809326, 818676, 790215, 779157, 821689	102	81	12782	7.73542	0.617471	0.0447284	4.87084
INTERPRO	IPR019955:Ubiquitin supergroup	4	3.6036	0.00464998	809326, 818676, 790215, 779157	109	52	16659	11.7565	0.774957	0.138557	6.09583
GOTERM_BP_FAT	GO:0016202~regulation of striated muscle tissue development	4	3.6036	0.00473569	809326, 818676, 790215, 779157	93	50	13528	11.637	0.99893	0.0773217	7.54881
GOTERM_BP_FAT	GO:0048634~regulation of muscle development	4	3.6036	0.00500717	809326, 818676, 790215, 779157	93	51	13528	11.4088	0.999278	0.0806699	7.96489
GOTERM_BP_FAT	GO:0010498~proteasomal protein catabolic process	5	4.5045	0.00512545	818836, 809326, 818676, 790215, 779157	93	102	13528	7.13051	0.999392	0.0815908	8.14563
GOTERM_BP_FAT	GO:0043161~proteasomal ubiquitin-dependent protein catabolic process	5	4.5045	0.00512545	818836, 809326, 818676, 790215, 779157	93	102	13528	7.13051	0.999392	0.0815908	8.14563
UP_SEQ_FEATURE	cross-link:Glycyl lysine isopeptide (Lys-Gly) (interchain with G-Cter in ubiquitin)	6	5.40541	0.00589548	809326, 788227, 818676, 790215, 779157, 803417	111	199	19113	5.19163	0.986887	0.250947	8.58132
GOTERM_BP_FAT	GO:0044093~positive regulation of molecular function	11	9.90991	0.0063789	818836, 794781, 809326, 818676, 826111, 791615, 826073, 790215, 817654, 779157, 804233	93	586	13528	2.73052	0.999901	0.093442	10.0405
GOTERM_CC_FAT	GO:0044445~cytosolic part	6	5.40541	0.00706697	809326, 818676, 799578, 790215, 779157, 821689	102	152	12782	4.94659	0.83018	0.0712128	8.80158
GOTERM_BP_FAT	GO:0006412~translation	8	7.20721	0.00730897	809326, 785252, 818676, 822682, 790215, 782385, 820495, 779157	93	331	13528	3.51571	0.999974	0.100314	11.4228
SP_PIR_KEYWORDS	ribosome	4	3.6036	0.00846748	809326, 818676, 790215, 779157	111	73	19235	9.49525	0.894962	0.0701123	10.5492
GOTERM_BP_FAT	GO:0016567~protein ubiquitination	5	4.5045	0.00877858	818836, 809326, 818676, 790215, 779157	93	119	13528	6.11186	0.999997	0.115003	13.5663
GOTERM_BP_FAT	GO:0031400~negative regulation of protein modification process	5	4.5045	0.00877858	809326, 818676, 814479, 790215, 779157	93	119	13528	6.11186	0.999997	0.115003	13.5663
GOTERM_BP_FAT	GO:0043065~positive regulation of apoptosis	9	8.10811	0.00886253	809326, 809292, 818676, 784611, 791615, 787982, 790215, 779157, 804233	93	430	13528	3.04456	0.999997	0.113981	13.6872
GOTERM_BP_FAT	GO:0031401~positive regulation of protein modification process	6	5.40541	0.00892931	794781, 809326, 818676, 814479, 790215, 779157	93	187	13528	4.66724	0.999998	0.113783	13.7833
GOTERM_BP_FAT	GO:0043068~positive regulation of programmed cell death	9	8.10811	0.00922075	809326, 809292, 818676, 784611, 791615, 787982, 790215, 779157, 804233	93	433	13528	3.02347	0.999998	0.116266	14.2016
GOTERM_BP_FAT	GO:0008219~cell death	12	10.8108	0.00941609	818836, 794781, 809326, 809292, 818676, 784611, 791615, 787982, 790215, 817654, 779157, 819944	93	719	13528	2.42774	0.999999	0.117567	14.4809
GOTERM_BP_FAT	GO:0010942~positive regulation of cell death	9	8.10811	0.00946552	809326, 809292, 818676, 784611, 791615, 787982, 790215, 779157, 804233	93	435	13528	3.00957	0.999999	0.11714	14.5514
GOTERM_BP_FAT	GO:0019226~transmission of nerve impulse	8	7.20721	0.0097765	795963, 809326, 795339, 818676, 791615, 790215, 779157, 804233	93	350	13528	3.32485	0.999999	0.119744	14.9939
GOTERM_BP_FAT	GO:0051436~negative regulation of ubiquitin-protein ligase activity during mitotic cell cycle	4	3.6036	0.00981014	809326, 818676, 790215, 779157	93	65	13528	8.95153	0.999999	0.119126	15.0416
GOTERM_BP_FAT	GO:0031145~anaphase-promoting complex-dependent proteasomal ubiquitin-dependent protein catabolic process	4	3.6036	0.00981014	809326, 818676, 790215, 779157	93	65	13528	8.95153	0.999999	0.119126	15.0416
GOTERM_BP_FAT	GO:0016265~death	12	10.8108	0.00988868	818836, 794781, 809326, 809292, 818676, 784611, 791615, 787982, 790215, 817654, 779157, 819944	93	724	13528	2.41098	0.999999	0.118049	15.153
SP_PIR_KEYWORDS	isopeptide bond	7	6.30631	0.0100782	809326, 788227, 818676, 790215, 779157, 803417, 787908	111	319	19235	3.80256	0.931728	0.0804613	12.4355
GOTERM_BP_FAT	GO:0051352~negative regulation of ligase activity	4	3.6036	0.010655	809326, 818676, 790215, 779157	93	67	13528	8.68432	1	0.124597	16.2323
GOTERM_BP_FAT	GO:0051444~negative regulation of ubiquitin-protein ligase activity	4	3.6036	0.010655	809326, 818676, 790215, 779157	93	67	13528	8.68432	1	0.124597	16.2323
GOTERM_BP_FAT	GO:0051437~positive regulation of ubiquitin-protein ligase activity during mitotic cell cycle	4	3.6036	0.0110927	809326, 818676, 790215, 779157	93	68	13528	8.55661	1	0.128365	16.843
GOTERM_BP_FAT	GO:0051443~positive regulation of ubiquitin-protein ligase activity	4	3.6036	0.0119992	809326, 818676, 790215, 779157	93	70	13528	8.31214	1	0.135997	18.0944
GOTERM_BP_FAT	GO:0051439~regulation of ubiquitin-protein ligase activity during mitotic cell cycle	4	3.6036	0.0124679	809326, 818676, 790215, 779157	93	71	13528	8.19506	1	0.13986	18.7345
GOTERM_BP_FAT	GO:0032446~protein modification by small protein conjugation	5	4.5045	0.0124994	818836, 809326, 818676, 790215, 779157	93	132	13528	5.50994	1	0.139116	18.7774
GOTERM_BP_FAT	GO:0051351~positive regulation of ligase activity	4	3.6036	0.0134366	809326, 818676, 790215, 779157	93	73	13528	7.97054	1	0.146562	20.0426
GOTERM_CC_FAT	GO:0015935~small ribosomal subunit	4	3.6036	0.0135007	809326, 818676, 790215, 779157	102	63	12782	7.95643	0.966565	0.103824	16.187
GOTERM_BP_FAT	GO:0031397~negative regulation of protein ubiquitination	4	3.6036	0.0139366	809326, 818676, 790215, 779157	93	74	13528	7.86283	1	0.15049	20.71
GOTERM_BP_FAT	GO:0007268~synaptic transmission	7	6.30631	0.0159549	795963, 809326, 795339, 818676, 790215, 779157, 804233	93	298	13528	3.4169	1	0.168014	23.3513
GOTERM_BP_FAT	GO:0051438~regulation of ubiquitin-protein ligase activity	4	3.6036	0.0160418	809326, 818676, 790215, 779157	93	78	13528	7.45961	1	0.167643	23.4631
GOTERM_MF_FAT	GO:0005198~structural molecule activity	11	9.90991	0.0173601	800376, 809326, 825519, 823371, 818676, 780448, 814755, 790215, 817654, 779157, 804645	96	634	12983	2.34643	0.996566	0.353684	21.0824
GOTERM_BP_FAT	GO:0051340~regulation of ligase activity	4	3.6036	0.0177318	809326, 818676, 790215, 779157	93	81	13528	7.18333	1	0.181147	25.6079
GOTERM_CC_FAT	GO:0033279~ribosomal subunit	5	4.5045	0.0185873	809326, 818676, 790215, 779157, 821689	102	128	12782	4.89507	0.990818	0.119065	21.6308
GOTERM_BP_FAT	GO:0009891~positive regulation of biosynthetic process	11	9.90991	0.019439	794781, 809326, 818676, 826111, 784511, 814479, 790215, 817654, 779157, 791411, 804233	93	695	13528	2.30228	1	0.190307	27.7172
GOTERM_BP_FAT	GO:0031398~positive regulation of protein ubiquitination	4	3.6036	0.0195175	809326, 818676, 790215, 779157	93	84	13528	6.92678	1	0.189733	27.8127
GOTERM_BP_FAT	GO:0006917~induction of apoptosis	7	6.30631	0.021826	809326, 809292, 818676, 787982, 790215, 779157, 804233	93	320	13528	3.18199	1	0.204492	30.5723
GOTERM_BP_FAT	GO:0012502~induction of programmed cell death	7	6.30631	0.0221234	809326, 809292, 818676, 787982, 790215, 779157, 804233	93	321	13528	3.17208	1	0.205681	30.9205
GOTERM_BP_FAT	GO:0070647~protein modification by small protein conjugation or removal	5	4.5045	0.0235902	818836, 809326, 818676, 790215, 779157	93	160	13528	4.5457	1	0.209921	32.6139
GOTERM_BP_FAT	GO:0006511~ubiquitin-dependent protein catabolic process	6	5.40541	0.0245877	818836, 809326, 818676, 790215, 779157, 791411	93	242	13528	3.6065	1	0.21525	33.7432
GOTERM_BP_FAT	GO:0044265~cellular macromolecule catabolic process	11	9.90991	0.0251961	818836, 809326, 809292, 818676, 794878, 791615, 787982, 790215, 779157, 791411, 804233	93	725	13528	2.20702	1	0.216143	34.4232
GOTERM_BP_FAT	GO:0031396~regulation of protein ubiquitination	4	3.6036	0.0306637	809326, 818676, 790215, 779157	93	100	13528	5.81849	1	0.251389	40.247
GOTERM_BP_FAT	GO:0006414~translational elongation	4	3.6036	0.0314509	809326, 818676, 790215, 779157	93	101	13528	5.76089	1	0.255605	41.0443
GOTERM_BP_FAT	GO:0010557~positive regulation of macromolecule biosynthetic process	10	9.00901	0.0335231	794781, 809326, 818676, 826111, 784511, 814479, 790215, 817654, 779157, 791411	93	654	13528	2.2242	1	0.265838	43.0956
GOTERM_BP_FAT	GO:0022402~cell cycle process	9	8.10811	0.0382501	795963, 809326, 818676, 784977, 794878, 783768, 790215, 817654, 779157	93	565	13528	2.3171	1	0.296193	47.5268
GOTERM_BP_FAT	GO:0009057~macromolecule catabolic process	11	9.90991	0.0390939	818836, 809326, 809292, 818676, 794878, 791615, 787982, 790215, 779157, 791411, 804233	93	781	13528	2.04877	1	0.298632	48.2829
GOTERM_BP_FAT	GO:0043086~negative regulation of catalytic activity	6	5.40541	0.0404686	809326, 818676, 814479, 790215, 779157, 804233	93	277	13528	3.15081	1	0.302865	49.4928
GOTERM_BP_FAT	GO:0008624~induction of apoptosis by extracellular signals	4	3.6036	0.0408032	809326, 818676, 790215, 779157	93	112	13528	5.19508	1	0.30346	49.7832
GOTERM_BP_FAT	GO:0031328~positive regulation of cellular biosynthetic process	10	9.00901	0.0430134	809326, 818676, 826111, 784511, 814479, 790215, 817654, 779157, 791411, 804233	93	685	13528	2.12354	1	0.314161	51.6625
GOTERM_BP_FAT	GO:0031399~regulation of protein modification process	6	5.40541	0.0506094	794781, 809326, 818676, 814479, 790215, 779157	93	295	13528	2.95856	1	0.349559	57.63
GOTERM_BP_FAT	GO:0010605~negative regulation of macromolecule metabolic process	10	9.00901	0.0614774	809326, 818676, 814479, 795726, 822682, 790215, 817654, 779157, 820867, 787908	93	734	13528	1.98178	1	0.396574	64.9747
GOTERM_BP_FAT	GO:0010604~positive regulation of macromolecule metabolic process	11	9.90991	0.0654391	794781, 809326, 818676, 826111, 784511, 814479, 790215, 817654, 779157, 791411, 804233	93	857	13528	1.86708	1	0.409721	67.3408
SP_PIR_KEYWORDS	ribonucleoprotein	5	4.5045	0.0762303	809326, 818676, 790215, 779157, 826487	111	279	19235	3.10552	1	0.366689	64.6377
GOTERM_BP_FAT	GO:0044092~negative regulation of molecular function	6	5.40541	0.0772898	809326, 818676, 814479, 790215, 779157, 804233	93	334	13528	2.6131	1	0.453226	73.5537
GOTERM_CC_FAT	GO:0031974~membrane-enclosed lumen	21	18.9189	0.0889171	793612, 809686, 818836, 797658, 809292, 788949, 822806, 787596, 790215, 779157, 809326, 785252, 818676, 791615, 811080, 790625, 787982, 817654, 791411, 787908, 823969	102	1856	12782	1.41788	1	0.340135	70.1724
GOTERM_CC_FAT	GO:0005840~ribosome	5	4.5045	0.0905857	809326, 818676, 790215, 779157, 821689	102	215	12782	2.91427	1	0.335876	70.8743
SP_PIR_KEYWORDS	ribosomal protein	4	3.6036	0.0931974	809326, 818676, 790215, 779157	111	188	19235	3.68698	1	0.404588	72.2673
GOTERM_BP_FAT	GO:0000278~mitotic cell cycle	6	5.40541	0.107518	795963, 809326, 818676, 784977, 790215, 779157	93	370	13528	2.35885	1	0.559376	84.7534
SP_PIR_KEYWORDS	ubl conjugation	7	6.30631	0.121006	809326, 788227, 818676, 791615, 790215, 779157, 803417	111	588	19235	2.06296	1	0.468974	81.5645
GOTERM_CC_FAT	GO:0043233~organelle lumen	20	18.018	0.12144	793612, 809686, 818836, 809292, 788949, 822806, 787596, 790215, 779157, 809326, 785252, 818676, 791615, 811080, 790625, 787982, 817654, 791411, 787908, 823969	102	1820	12782	1.37707	1	0.392234	81.3989
GOTERM_MF_FAT	GO:0003735~structural constituent of ribosome	4	3.6036	0.125173	809326, 818676, 790215, 779157	96	168	12983	3.21999	1	0.82327	83.6017
GOTERM_BP_FAT	GO:0045935~positive regulation of nucleobase, nucleoside, nucleotide and nucleic acid metabolic process	8	7.20721	0.131975	809326, 818676, 784511, 814479, 790215, 779157, 791411, 804233	93	624	13528	1.8649	1	0.626664	90.3696
GOTERM_BP_FAT	GO:0051173~positive regulation of nitrogen compound metabolic process	8	7.20721	0.14823	809326, 818676, 784511, 814479, 790215, 779157, 791411, 804233	93	644	13528	1.80699	1	0.660519	92.9547
GOTERM_BP_FAT	GO:0007049~cell cycle	9	8.10811	0.157226	795963, 809326, 818676, 784977, 794878, 783768, 790215, 817654, 779157	93	776	13528	1.68706	1	0.680555	94.0891
GOTERM_BP_FAT	GO:0006508~proteolysis	11	9.90991	0.17818	794018, 818836, 794781, 809326, 818676, 798274, 794878, 790625, 790215, 779157, 791411	93	1054	13528	1.51811	1	0.72506	96.1019
GOTERM_BP_FAT	GO:0045941~positive regulation of transcription	7	6.30631	0.18535	809326, 818676, 784511, 814479, 790215, 779157, 791411	93	564	13528	1.80538	1	0.735689	96.6276
GOTERM_BP_FAT	GO:0010628~positive regulation of gene expression	7	6.30631	0.203094	809326, 818676, 784511, 814479, 790215, 779157, 791411	93	581	13528	1.75256	1	0.763337	97.6569
GOTERM_CC_FAT	GO:0030529~ribonucleoprotein complex	7	6.30631	0.222091	809326, 788227, 818676, 790215, 779157, 826487, 821689	102	515	12782	1.70329	1	0.552892	96.1712
GOTERM_BP_FAT	GO:0007267~cell-cell signaling	7	6.30631	0.223641	795963, 809326, 795339, 818676, 790215, 779157, 804233	93	600	13528	1.69706	1	0.791029	98.4787
GOTERM_BP_FAT	GO:0051603~proteolysis involved in cellular protein catabolic process	7	6.30631	0.223641	818836, 809326, 818676, 794878, 790215, 779157, 791411	93	600	13528	1.69706	1	0.791029	98.4787
GOTERM_BP_FAT	GO:0044257~cellular protein catabolic process	7	6.30631	0.226949	818836, 809326, 818676, 794878, 790215, 779157, 791411	93	603	13528	1.68862	1	0.795086	98.5824
GOTERM_CC_FAT	GO:0070013~intracellular organelle lumen	18	16.2162	0.23504	793612, 809686, 818836, 809292, 822806, 788949, 787596, 790215, 779157, 809326, 785252, 818676, 791615, 811080, 790625, 787982, 791411, 823969	102	1779	12782	1.26793	1	0.567117	96.9214
GOTERM_BP_FAT	GO:0030163~protein catabolic process	7	6.30631	0.248267	818836, 809326, 818676, 794878, 790215, 779157, 791411	93	622	13528	1.63704	1	0.823621	99.1072
GOTERM_BP_FAT	GO:0050877~neurological system process	11	9.90991	0.306955	795963, 809326, 795339, 818676, 826111, 783768, 791615, 790215, 820495, 779157, 804233	93	1210	13528	1.32239	1	0.880198	99.7672
GOTERM_BP_FAT	GO:0019941~modification-dependent protein catabolic process	6	5.40541	0.3518	818836, 809326, 818676, 790215, 779157, 791411	93	574	13528	1.52051	1	0.908708	99.923
GOTERM_BP_FAT	GO:0043632~modification-dependent macromolecule catabolic process	6	5.40541	0.3518	818836, 809326, 818676, 790215, 779157, 791411	93	574	13528	1.52051	1	0.908708	99.923
SP_PIR_KEYWORDS	zinc	13	11.7117	0.606758	795829, 778543, 784511, 788949, 790175, 790215, 779157, 781129, 809326, 818676, 791615, 791411, 782395	111	2189	19235	1.02912	1	0.959728	99.9995
GOTERM_BP_FAT	GO:0045893~positive regulation of transcription, DNA-dependent	3	2.7027	0.840455	784511, 814479, 791411	93	477	13528	0.914858	1	0.999797	100
GOTERM_BP_FAT	GO:0051254~positive regulation of RNA metabolic process	3	2.7027	0.843866	784511, 814479, 791411	93	481	13528	0.90725	1	0.999812	100
GOTERM_MF_FAT	GO:0008270~zinc ion binding	14	12.6126	0.88532	795829, 778543, 784511, 788949, 790175, 790215, 779157, 781129, 809326, 818676, 783505, 791615, 791411, 782395	96	2311	12983	0.819279	1	0.999994	100
GOTERM_CC_FAT	GO:0031981~nuclear lumen	9	8.10811	0.899041	818836, 809686, 809326, 818676, 822806, 790215, 811080, 779157, 791411	102	1450	12782	0.777809	1	0.997754	100
GOTERM_CC_FAT	GO:0005654~nucleoplasm	5	4.5045	0.924741	809326, 818676, 790215, 811080, 779157	102	882	12782	0.710395	1	0.998813	100
SP_PIR_KEYWORDS	zinc-finger	7	6.30631	0.935486	781129, 809326, 818676, 784511, 790215, 779157, 782395	111	1718	19235	0.706064	1	0.999763	100
GOTERM_MF_FAT	GO:0030528~transcription regulator activity	8	7.20721	0.936558	809326, 788227, 818676, 784511, 795726, 790215, 779157, 791411	96	1512	12983	0.715553	1	1	100
SP_PIR_KEYWORDS	nucleus	17	15.3153	0.984351	818836, 809292, 784511, 822806, 788949, 795726, 790215, 779157, 795963, 809326, 785252, 788227, 818676, 826073, 782974, 787982, 791411	111	4283	19235	0.687812	1	0.999996	100
GOTERM_BP_FAT	GO:0045449~regulation of transcription	11	9.90991	0.98947	809326, 788227, 818676, 784511, 814479, 789056, 795726, 790215, 782974, 779157, 791411	93	2601	13528	0.615181	1	1	100
Annotation Cluster 10	Enrichment Score: 2.6176332930040935
Category	Term	Count	%	PValue	Genes	List Total	Pop Hits	Pop Total	Fold Enrichment	Bonferroni	Benjamini	FDR
GOTERM_CC_FAT	GO:0031012~extracellular matrix	12	10.8108	8.57453e-05	775692, 800376, 825565, 823371, 800485, 801761, 780030, 780448, 814755, 791615, 817654, 804645	102	345	12782	4.35874	0.0212091	0.00712028	0.111334
GOTERM_CC_FAT	GO:0044421~extracellular region part	20	18.018	0.000161761	794781, 800376, 794153, 823371, 814479, 794018, 775692, 825565, 800485, 801761, 780030, 814755, 791615, 780448, 817654, 804645, 787908, 810395, 804233, 784099	102	960	12782	2.6107	0.0396365	0.00671791	0.209939
SP_PIR_KEYWORDS	extracellular matrix	8	7.20721	0.000473115	775692, 800376, 825565, 823371, 800485, 780448, 814755, 804645	111	241	19235	5.75231	0.117861	0.00657853	0.618479
SP_PIR_KEYWORDS	Secreted	21	18.9189	0.00134129	794781, 800376, 794153, 823371, 785547, 794018, 775692, 825565, 785252, 800485, 801761, 780030, 809797, 814755, 780448, 804645, 787908, 784099, 804233, 810395, 803569	111	1689	19235	2.15456	0.299303	0.0153454	1.74422
GOTERM_CC_FAT	GO:0005604~basement membrane	5	4.5045	0.00334892	825565, 823371, 780030, 814755, 804645	102	78	12782	8.03293	0.567699	0.0455221	4.26427
GOTERM_MF_FAT	GO:0005201~extracellular matrix structural constituent	5	4.5045	0.00361445	800376, 823371, 780448, 814755, 804645	96	86	12983	7.86277	0.690625	0.136404	4.7776
GOTERM_CC_FAT	GO:0005578~proteinaceous extracellular matrix	9	8.10811	0.0038027	775692, 800376, 825565, 823371, 800485, 780030, 780448, 814755, 804645	102	320	12782	3.52445	0.614219	0.048895	4.82899
GOTERM_BP_FAT	GO:0030198~extracellular matrix organization	5	4.5045	0.00548923	825565, 823371, 814479, 780448, 804645	93	104	13528	6.99338	0.999641	0.0834716	8.6994
GOTERM_CC_FAT	GO:0044420~extracellular matrix part	5	4.5045	0.0137889	825565, 823371, 780030, 814755, 804645	102	117	12782	5.35529	0.968921	0.102799	16.5045
SP_PIR_KEYWORDS	basement membrane	3	2.7027	0.0209258	825565, 823371, 804645	111	39	19235	13.3299	0.996318	0.156186	24.2133
GOTERM_BP_FAT	GO:0043062~extracellular structure organization	5	4.5045	0.0250438	825565, 823371, 814479, 780448, 804645	93	163	13528	4.46204	1	0.216239	34.2537
Annotation Cluster 11	Enrichment Score: 2.5301018078920845
Category	Term	Count	%	PValue	Genes	List Total	Pop Hits	Pop Total	Fold Enrichment	Bonferroni	Benjamini	FDR
UP_SEQ_FEATURE	domain:LIM zinc-binding 3	4	3.6036	0.000388998	795829, 778543, 784511, 791411	111	25	19113	27.5503	0.248129	0.0399228	0.588625
GOTERM_CC_FAT	GO:0070161~anchoring junction	8	7.20721	0.000420499	826111, 778543, 802187, 784977, 784511, 788771, 794878, 791411	102	172	12782	5.82855	0.0998076	0.0149087	0.544893
SP_PIR_KEYWORDS	LIM domain	5	4.5045	0.000732699	795829, 778543, 784511, 790175, 791411	111	71	19235	12.2034	0.176537	0.00879007	0.956318
GOTERM_CC_FAT	GO:0005925~focal adhesion	6	5.40541	0.00126726	826111, 778543, 784977, 784511, 788771, 791411	102	102	12782	7.3714	0.27168	0.0312043	1.63384
INTERPRO	IPR001781:Zinc finger, LIM-type	5	4.5045	0.00128955	795829, 778543, 784511, 790175, 791411	109	73	16659	10.4681	0.338286	0.0792663	1.72623
GOTERM_CC_FAT	GO:0005912~adherens junction	7	6.30631	0.00141851	826111, 778543, 784977, 784511, 788771, 794878, 791411	102	155	12782	5.65933	0.298741	0.0317468	1.82719
GOTERM_CC_FAT	GO:0005924~cell-substrate adherens junction	6	5.40541	0.00150409	826111, 778543, 784977, 784511, 788771, 791411	102	106	12782	7.09323	0.313607	0.0308722	1.93643
SMART	SM00132:LIM	5	4.5045	0.00150914	795829, 778543, 784511, 790175, 791411	63	73	9079	9.87062	0.105742	0.105742	1.56834
GOTERM_CC_FAT	GO:0030055~cell-substrate junction	6	5.40541	0.00191842	826111, 778543, 784977, 784511, 788771, 791411	102	112	12782	6.71324	0.381257	0.0337091	2.46374
UP_SEQ_FEATURE	domain:LIM zinc-binding 2	4	3.6036	0.00298653	795829, 778543, 784511, 791411	111	50	19113	13.7751	0.888352	0.196871	4.43697
UP_SEQ_FEATURE	domain:LIM zinc-binding 1	4	3.6036	0.00298653	795829, 778543, 784511, 791411	111	50	19113	13.7751	0.888352	0.196871	4.43697
GOTERM_CC_FAT	GO:0016323~basolateral plasma membrane	7	6.30631	0.00541518	826111, 778543, 784977, 784511, 788771, 780030, 791411	102	203	12782	4.32116	0.74269	0.0598382	6.81091
GOTERM_CC_FAT	GO:0030054~cell junction	10	9.00901	0.0212199	775740, 826111, 778543, 802187, 784977, 784511, 788771, 794878, 791411, 797855	102	518	12782	2.41918	0.995309	0.122591	24.3183
SP_PIR_KEYWORDS	cell junction	6	5.40541	0.0789823	775740, 778543, 802187, 788771, 791411, 797855	111	399	19235	2.60584	1	0.365065	65.9942
GOTERM_CC_FAT	GO:0044463~cell projection part	5	4.5045	0.114166	826111, 784977, 788771, 783768, 791615	102	234	12782	2.67764	1	0.381868	79.2959
Annotation Cluster 12	Enrichment Score: 2.352798330715862
Category	Term	Count	%	PValue	Genes	List Total	Pop Hits	Pop Total	Fold Enrichment	Bonferroni	Benjamini	FDR
GOTERM_MF_FAT	GO:0030246~carbohydrate binding	11	9.90991	0.000258179	795963, 775692, 800376, 800485, 806556, 814479, 807686, 799578, 817654, 806127, 804233	96	354	12983	4.20236	0.0802568	0.0802568	0.348488
GOTERM_MF_FAT	GO:0005539~glycosaminoglycan binding	7	6.30631	0.000558835	795963, 775692, 800376, 800485, 814479, 817654, 804233	96	140	12983	6.76198	0.165659	0.0865774	0.752895
GOTERM_BP_FAT	GO:0016477~cell migration	9	8.10811	0.000574157	795963, 775692, 823371, 800485, 784977, 814479, 794878, 783768, 817654	93	276	13528	4.74334	0.562902	0.0170938	0.94513
GOTERM_MF_FAT	GO:0030247~polysaccharide binding	7	6.30631	0.000921462	795963, 775692, 800376, 800485, 814479, 817654, 804233	96	154	12983	6.14725	0.258212	0.0719529	1.23863
GOTERM_MF_FAT	GO:0001871~pattern binding	7	6.30631	0.000921462	795963, 775692, 800376, 800485, 814479, 817654, 804233	96	154	12983	6.14725	0.258212	0.0719529	1.23863
GOTERM_BP_FAT	GO:0051674~localization of cell	9	8.10811	0.00114593	795963, 775692, 823371, 800485, 784977, 814479, 794878, 783768, 817654	93	307	13528	4.26437	0.808379	0.0276155	1.878
GOTERM_BP_FAT	GO:0048870~cell motility	9	8.10811	0.00114593	795963, 775692, 823371, 800485, 784977, 814479, 794878, 783768, 817654	93	307	13528	4.26437	0.808379	0.0276155	1.878
GOTERM_CC_FAT	GO:0009897~external side of plasma membrane	7	6.30631	0.00226574	826111, 814479, 826073, 817654, 820867, 784099, 804233	102	170	12782	5.15998	0.432819	0.0370995	2.90376
UP_SEQ_FEATURE	region of interest:Heparin-binding	3	2.7027	0.00582828	775692, 817654, 804233	111	20	19113	25.8284	0.986221	0.263646	8.4875
GOTERM_BP_FAT	GO:0001568~blood vessel development	7	6.30631	0.00647491	775692, 814479, 794878, 817654, 819944, 820867, 804233	93	245	13528	4.15607	0.999914	0.0938347	10.1842
GOTERM_BP_FAT	GO:0001937~negative regulation of endothelial cell proliferation	3	2.7027	0.00652094	814479, 817654, 804233	93	18	13528	24.2437	0.99992	0.0926166	10.2529
GOTERM_MF_FAT	GO:0008201~heparin binding	5	4.5045	0.00685013	795963, 775692, 800376, 817654, 804233	96	103	12983	6.56503	0.892157	0.219213	8.87434
GOTERM_BP_FAT	GO:0001944~vasculature development	7	6.30631	0.00725971	775692, 814479, 794878, 817654, 819944, 820867, 804233	93	251	13528	4.05672	0.999972	0.100624	11.3501
GOTERM_MF_FAT	GO:0032403~protein complex binding	6	5.40541	0.014453	775692, 826111, 784977, 814479, 817654, 784099	96	196	12983	4.13999	0.991058	0.325024	17.8667
GOTERM_BP_FAT	GO:0048514~blood vessel morphogenesis	6	5.40541	0.0144843	775692, 814479, 794878, 817654, 819944, 804233	93	211	13528	4.13637	1	0.154811	21.435
GOTERM_BP_FAT	GO:0001525~angiogenesis	5	4.5045	0.0182988	775692, 814479, 794878, 817654, 819944	93	148	13528	4.91427	1	0.183845	26.3148
GOTERM_BP_FAT	GO:0001936~regulation of endothelial cell proliferation	3	2.7027	0.0198783	814479, 817654, 804233	93	32	13528	13.6371	1	0.191637	28.2508
GOTERM_CC_FAT	GO:0009986~cell surface	8	7.20721	0.0202586	826111, 784977, 814479, 826073, 817654, 820867, 784099, 804233	102	348	12782	2.88078	0.994004	0.120073	23.347
GOTERM_MF_FAT	GO:0019838~growth factor binding	4	3.6036	0.0416718	775692, 814479, 817654, 787908	96	105	12983	5.15198	0.999999	0.555693	43.7559
SP_PIR_KEYWORDS	heparin-binding	3	2.7027	0.0533953	775692, 817654, 804233	111	65	19235	7.99792	1	0.304788	51.2953
Annotation Cluster 13	Enrichment Score: 2.2062124447972424
Category	Term	Count	%	PValue	Genes	List Total	Pop Hits	Pop Total	Fold Enrichment	Bonferroni	Benjamini	FDR
GOTERM_BP_FAT	GO:0022604~regulation of cell morphogenesis	7	6.30631	0.000265264	775740, 778543, 794878, 783768, 791411, 819944, 804233	93	131	13528	7.7728	0.317707	0.009061	0.437704
SP_PIR_KEYWORDS	cell shape	4	3.6036	0.000337443	775740, 778543, 794878, 783768	111	24	19235	28.8814	0.0855546	0.00495643	0.441485
GOTERM_BP_FAT	GO:0008360~regulation of cell shape	4	3.6036	0.00587723	775740, 778543, 794878, 783768	93	54	13528	10.775	0.999795	0.0881929	9.28659
GOTERM_MF_FAT	GO:0051015~actin filament binding	3	2.7027	0.0573871	775740, 794878, 783768	96	53	12983	7.65507	1	0.654856	55.0227
GOTERM_CC_FAT	GO:0045202~synapse	5	4.5045	0.308369	775740, 784977, 794878, 783768, 797855	102	355	12782	1.76498	1	0.666239	99.1686
Annotation Cluster 14	Enrichment Score: 2.1965908558282212
Category	Term	Count	%	PValue	Genes	List Total	Pop Hits	Pop Total	Fold Enrichment	Bonferroni	Benjamini	FDR
INTERPRO	IPR006209:EGF	7	6.30631	0.000176825	825565, 800485, 809797, 814755, 826073, 817654, 784099	109	127	16659	8.42397	0.0550175	0.0186862	0.238352
INTERPRO	IPR013032:EGF-like region, conserved site	9	8.10811	0.00064062	825565, 823371, 800485, 784977, 809797, 814755, 826073, 817654, 784099	109	293	16659	4.69459	0.185405	0.0499741	0.861032
INTERPRO	IPR000742:EGF-like, type 3	7	6.30631	0.00165247	825565, 800485, 809797, 814755, 826073, 817654, 784099	109	194	16659	5.51466	0.41094	0.0728166	2.20704
INTERPRO	IPR006210:EGF-like	7	6.30631	0.00197654	825565, 800485, 809797, 814755, 826073, 817654, 784099	109	201	16659	5.32261	0.469067	0.0760894	2.63455
SP_PIR_KEYWORDS	egf-like domain	7	6.30631	0.00208627	825565, 800485, 809797, 814755, 826073, 817654, 784099	111	230	19235	5.27399	0.42503	0.0210611	2.70081
SMART	SM00181:EGF	7	6.30631	0.00239611	825565, 800485, 809797, 814755, 826073, 817654, 784099	63	201	9079	5.01879	0.16266	0.0849371	2.47968
UP_SEQ_FEATURE	domain:EGF-like 2; calcium-binding	4	3.6036	0.00433062	800485, 809797, 826073, 817654	111	57	19113	12.0835	0.958466	0.232873	6.37322
UP_SEQ_FEATURE	domain:EGF-like 1	5	4.5045	0.00511582	825565, 800485, 814755, 826073, 817654	111	120	19113	7.17455	0.976705	0.251133	7.48733
UP_SEQ_FEATURE	domain:EGF-like 3	4	3.6036	0.00927592	825565, 814755, 826073, 817654	111	75	19113	9.18342	0.99892	0.3309	13.1863
INTERPRO	IPR018097:EGF-like calcium-binding, conserved site	4	3.6036	0.0245066	800485, 809797, 814755, 826073	109	96	16659	6.36812	0.999644	0.514123	28.4535
INTERPRO	IPR001881:EGF-like calcium-binding	4	3.6036	0.0245066	800485, 809797, 814755, 826073	109	96	16659	6.36812	0.999644	0.514123	28.4535
INTERPRO	IPR000152:EGF-type aspartate/asparagine hydroxylation conserved site	4	3.6036	0.0251723	800485, 809797, 814755, 826073	109	97	16659	6.30247	0.999714	0.49331	29.1096
SMART	SM00179:EGF_CA	4	3.6036	0.0276555	800485, 809797, 814755, 826073	63	96	9079	6.00463	0.874486	0.404786	25.438
INTERPRO	IPR013091:EGF calcium-binding	3	2.7027	0.0794481	809797, 814755, 826073	109	72	16659	6.36812	1	0.869673	67.2772
INTERPRO	IPR013320:Concanavalin A-like lectin/glucanase, subgroup	3	2.7027	0.0891051	825565, 809797, 817654	109	77	16659	5.95461	1	0.881543	71.6178
Annotation Cluster 15	Enrichment Score: 2.1532358789152313
Category	Term	Count	%	PValue	Genes	List Total	Pop Hits	Pop Total	Fold Enrichment	Bonferroni	Benjamini	FDR
SP_PIR_KEYWORDS	plasma	7	6.30631	1.55185e-05	794018, 794781, 794153, 801761, 780030, 787908, 804233	111	93	19235	13.0432	0.00410398	0.000456831	0.0203428
GOTERM_BP_FAT	GO:0009611~response to wounding	14	12.6126	5.7907e-05	794781, 826111, 814479, 783768, 794018, 775692, 800485, 801761, 780030, 811688, 791615, 817654, 803569, 787908	93	530	13528	3.8424	0.0800596	0.00308584	0.0957045
GOTERM_BP_FAT	GO:0006953~acute-phase response	5	4.5045	0.000151792	794781, 801761, 780030, 787908, 803569	93	40	13528	18.1828	0.196476	0.00605793	0.250688
GOTERM_BP_FAT	GO:0002526~acute inflammatory response	6	5.40541	0.000538134	794018, 794781, 801761, 780030, 787908, 803569	93	98	13528	8.90586	0.5396	0.0167208	0.88608
GOTERM_BP_FAT	GO:0032101~regulation of response to external stimulus	7	6.30631	0.000743885	794018, 794781, 826111, 801761, 817654, 787908, 804233	93	159	13528	6.404	0.657792	0.0208067	1.22291
GOTERM_BP_FAT	GO:0050727~regulation of inflammatory response	5	4.5045	0.00176885	794018, 826111, 801761, 787908, 804233	93	76	13528	9.56989	0.922009	0.0384885	2.8849
GOTERM_CC_FAT	GO:0005615~extracellular space	13	11.7117	0.00765923	794781, 794153, 814479, 794018, 801761, 780030, 791615, 814755, 817654, 810395, 804233, 784099, 787908	102	685	12782	2.37822	0.853712	0.0712633	9.50574
GOTERM_BP_FAT	GO:0006954~inflammatory response	7	6.30631	0.0233404	794018, 794781, 801761, 780030, 817654, 787908, 803569	93	325	13528	3.13304	1	0.211788	32.3283
GOTERM_BP_FAT	GO:0006952~defense response	10	9.00901	0.0237986	794018, 794781, 795339, 792654, 784977, 801761, 780030, 817654, 787908, 803569	93	615	13528	2.36524	1	0.210307	32.8513
GOTERM_MF_FAT	GO:0004866~endopeptidase inhibitor activity	4	3.6036	0.0901459	794018, 801761, 787908, 810395	96	145	12983	3.73075	1	0.800308	72.119
GOTERM_MF_FAT	GO:0030414~peptidase inhibitor activity	4	3.6036	0.101806	794018, 801761, 787908, 810395	96	153	12983	3.53568	1	0.794283	76.5806
GOTERM_BP_FAT	GO:0048585~negative regulation of response to stimulus	3	2.7027	0.148108	801761, 787908, 804233	93	100	13528	4.36387	1	0.661909	92.938
KEGG_PATHWAY	hsa04610:Complement and coagulation cascades	3	2.7027	0.156486	794018, 794781, 787908	53	69	5085	4.17145	0.999998	0.842393	83.3172
GOTERM_BP_FAT	GO:0032844~regulation of homeostatic process	3	2.7027	0.181721	794781, 801761, 780030	93	114	13528	3.82796	1	0.731154	96.3705
GOTERM_MF_FAT	GO:0004857~enzyme inhibitor activity	4	3.6036	0.31661	794018, 801761, 787908, 810395	96	270	12983	2.00355	1	0.954205	99.4182
Annotation Cluster 16	Enrichment Score: 2.145842215509356
Category	Term	Count	%	PValue	Genes	List Total	Pop Hits	Pop Total	Fold Enrichment	Bonferroni	Benjamini	FDR
SP_PIR_KEYWORDS	cell adhesion	12	10.8108	3.02564e-05	775692, 823371, 826111, 778543, 802187, 784977, 814479, 780448, 782974, 817654, 820867, 784099	111	422	19235	4.92763	0.00798602	0.000616585	0.0396589
GOTERM_MF_FAT	GO:0005178~integrin binding	5	4.5045	0.000900001	775692, 826111, 784977, 817654, 784099	96	59	12983	11.461	0.253031	0.0926653	1.20995
GOTERM_BP_FAT	GO:0031589~cell-substrate adhesion	5	4.5045	0.00444719	775692, 823371, 826111, 784977, 820867	93	98	13528	7.42155	0.998376	0.0736106	7.10469
GOTERM_MF_FAT	GO:0032403~protein complex binding	6	5.40541	0.014453	775692, 826111, 784977, 814479, 817654, 784099	96	196	12983	4.13999	0.991058	0.325024	17.8667
GOTERM_CC_FAT	GO:0009986~cell surface	8	7.20721	0.0202586	826111, 784977, 814479, 826073, 817654, 820867, 784099, 804233	102	348	12782	2.88078	0.994004	0.120073	23.347
GOTERM_BP_FAT	GO:0042127~regulation of cell proliferation	10	9.00901	0.0865115	781129, 797658, 823371, 826111, 784977, 814479, 817654, 791411, 784099, 804233	93	787	13528	1.84831	1	0.485853	77.6006
GOTERM_BP_FAT	GO:0008284~positive regulation of cell proliferation	5	4.5045	0.310682	781129, 823371, 826111, 784977, 784099	93	414	13528	1.75679	1	0.88187	99.787
Annotation Cluster 17	Enrichment Score: 2.0679392321186127
Category	Term	Count	%	PValue	Genes	List Total	Pop Hits	Pop Total	Fold Enrichment	Bonferroni	Benjamini	FDR
GOTERM_BP_FAT	GO:0009266~response to temperature stimulus	5	4.5045	0.00244378	795593, 791615, 822682, 821489, 817654	93	83	13528	8.76279	0.970572	0.0477897	3.96492
GOTERM_BP_FAT	GO:0009408~response to heat	4	3.6036	0.00650443	795593, 791615, 822682, 817654	93	56	13528	10.3902	0.999918	0.0933086	10.2283
GOTERM_BP_FAT	GO:0009628~response to abiotic stimulus	7	6.30631	0.0393469	795593, 818352, 826111, 791615, 822682, 821489, 817654	93	368	13528	2.76695	1	0.297219	48.5076
Annotation Cluster 18	Enrichment Score: 1.9273624599546655
Category	Term	Count	%	PValue	Genes	List Total	Pop Hits	Pop Total	Fold Enrichment	Bonferroni	Benjamini	FDR
GOTERM_BP_FAT	GO:0001503~ossification	5	4.5045	0.0078008	775692, 825565, 795829, 784511, 801761	93	115	13528	6.32445	0.999987	0.105717	12.1456
GOTERM_BP_FAT	GO:0060348~bone development	5	4.5045	0.00983335	775692, 825565, 795829, 784511, 801761	93	123	13528	5.9131	0.999999	0.118401	15.0745
GOTERM_BP_FAT	GO:0001501~skeletal system development	7	6.30631	0.0215314	775692, 800376, 825565, 795829, 784511, 801761, 814755	93	319	13528	3.19196	1	0.203308	30.2257
Annotation Cluster 19	Enrichment Score: 1.9182150848267643
Category	Term	Count	%	PValue	Genes	List Total	Pop Hits	Pop Total	Fold Enrichment	Bonferroni	Benjamini	FDR
GOTERM_BP_FAT	GO:0051789~response to protein stimulus	5	4.5045	0.00606666	818836, 792654, 826111, 821489, 820495	93	107	13528	6.79731	0.999844	0.0899784	9.57198
GOTERM_BP_FAT	GO:0034620~cellular response to unfolded protein	3	2.7027	0.00883275	818836, 821489, 820495	93	21	13528	20.7803	0.999997	0.114637	13.6443
GOTERM_BP_FAT	GO:0030968~endoplasmic reticulum unfolded protein response	3	2.7027	0.00883275	818836, 821489, 820495	93	21	13528	20.7803	0.999997	0.114637	13.6443
GOTERM_BP_FAT	GO:0006986~response to unfolded protein	4	3.6036	0.0124679	818836, 792654, 821489, 820495	93	71	13528	8.19506	1	0.13986	18.7345
GOTERM_BP_FAT	GO:0034976~response to endoplasmic reticulum stress	3	2.7027	0.0222874	818836, 821489, 820495	93	34	13528	12.8349	1	0.205745	31.1118
GOTERM_BP_FAT	GO:0006984~ER-nuclear signaling pathway	3	2.7027	0.023535	818836, 821489, 820495	93	35	13528	12.4682	1	0.210761	32.5509
Annotation Cluster 20	Enrichment Score: 1.8923905311472122
Category	Term	Count	%	PValue	Genes	List Total	Pop Hits	Pop Total	Fold Enrichment	Bonferroni	Benjamini	FDR
KEGG_PATHWAY	hsa04810:Regulation of actin cytoskeleton	10	9.00901	0.000274896	794781, 775740, 825519, 826111, 784977, 794878, 783768, 789056, 798323, 820867	53	215	5085	4.46248	0.0206782	0.00694079	0.288895
SP_PIR_KEYWORDS	myosin	4	3.6036	0.0031042	825519, 794878, 783768, 798323	111	51	19235	13.5912	0.561279	0.028996	3.99398
GOTERM_CC_FAT	GO:0015629~actin cytoskeleton	8	7.20721	0.00541624	795829, 825519, 778146, 801728, 788771, 794878, 783768, 798323	102	269	12782	3.7268	0.742759	0.0573236	6.81221
SP_PIR_KEYWORDS	motor protein	5	4.5045	0.00698625	825519, 784611, 794878, 783768, 798323	111	132	19235	6.56395	0.843993	0.0600499	8.78138
GOTERM_CC_FAT	GO:0016459~myosin complex	4	3.6036	0.0146832	825519, 794878, 783768, 798323	102	65	12782	7.71161	0.975228	0.106011	17.4828
GOTERM_MF_FAT	GO:0003774~motor activity	5	4.5045	0.0202998	825519, 784611, 794878, 783768, 798323	96	142	12983	4.76196	0.998699	0.377884	24.2152
KEGG_PATHWAY	hsa04530:Tight junction	4	3.6036	0.156524	825519, 794878, 783768, 798323	53	134	5085	2.86398	0.999998	0.801531	83.325
GOTERM_CC_FAT	GO:0044430~cytoskeletal part	9	8.10811	0.481862	795963, 795829, 825519, 801728, 784611, 794878, 783768, 798323, 797855	102	952	12782	1.18469	1	0.848839	99.9805
Annotation Cluster 21	Enrichment Score: 1.8883244414907487
Category	Term	Count	%	PValue	Genes	List Total	Pop Hits	Pop Total	Fold Enrichment	Bonferroni	Benjamini	FDR
GOTERM_CC_FAT	GO:0015629~actin cytoskeleton	8	7.20721	0.00541624	795829, 825519, 778146, 801728, 788771, 794878, 783768, 798323	102	269	12782	3.7268	0.742759	0.0573236	6.81221
GOTERM_CC_FAT	GO:0001725~stress fiber	3	2.7027	0.0152373	795829, 794878, 783768	102	24	12782	15.6642	0.978477	0.106761	18.0835
GOTERM_CC_FAT	GO:0032432~actin filament bundle	3	2.7027	0.0177601	795829, 794878, 783768	102	26	12782	14.4593	0.988666	0.117011	20.7683
GOTERM_CC_FAT	GO:0042641~actomyosin	3	2.7027	0.0190832	795829, 794878, 783768	102	27	12782	13.9237	0.991908	0.119056	22.1437
Annotation Cluster 22	Enrichment Score: 1.7787267057574139
Category	Term	Count	%	PValue	Genes	List Total	Pop Hits	Pop Total	Fold Enrichment	Bonferroni	Benjamini	FDR
GOTERM_BP_FAT	GO:0001666~response to hypoxia	6	5.40541	0.00218487	818276, 826111, 814479, 780030, 817654, 803569	93	134	13528	6.51324	0.957227	0.0452929	3.55196
GOTERM_BP_FAT	GO:0070482~response to oxygen levels	6	5.40541	0.00272601	818276, 826111, 814479, 780030, 817654, 803569	93	141	13528	6.18989	0.980426	0.0510956	4.41319
GOTERM_BP_FAT	GO:0030155~regulation of cell adhesion	4	3.6036	0.0666173	826111, 814479, 780448, 817654	93	137	13528	4.24708	1	0.412127	68.015
GOTERM_CC_FAT	GO:0048471~perinuclear region of cytoplasm	5	4.5045	0.193443	795963, 775740, 826111, 780030, 803569	102	288	12782	2.17559	1	0.521086	93.8751
Annotation Cluster 23	Enrichment Score: 1.6272208228087326
Category	Term	Count	%	PValue	Genes	List Total	Pop Hits	Pop Total	Fold Enrichment	Bonferroni	Benjamini	FDR
GOTERM_BP_FAT	GO:0022411~cellular component disassembly	6	5.40541	2.89147e-05	795963, 809292, 823371, 814479, 791615, 787982	93	53	13528	16.4674	0.0408105	0.00198216	0.0477988
GOTERM_BP_FAT	GO:0006997~nucleus organization	4	3.6036	0.00528786	795963, 809292, 791615, 787982	93	52	13528	11.1894	0.999519	0.0813859	8.39325
GOTERM_BP_FAT	GO:0006309~DNA fragmentation involved in apoptosis	3	2.7027	0.00725604	809292, 791615, 787982	93	19	13528	22.9677	0.999972	0.101548	11.3447
GOTERM_BP_FAT	GO:0006921~cell structure disassembly during apoptosis	3	2.7027	0.0105481	809292, 791615, 787982	93	23	13528	18.9734	1	0.124425	16.0825
GOTERM_BP_FAT	GO:0000737~DNA catabolic process, endonucleolytic	3	2.7027	0.0133724	809292, 791615, 787982	93	26	13528	16.7841	1	0.147015	19.9565
GOTERM_BP_FAT	GO:0030262~apoptotic nuclear changes	3	2.7027	0.0133724	809292, 791615, 787982	93	26	13528	16.7841	1	0.147015	19.9565
GOTERM_BP_FAT	GO:0033554~cellular response to stress	9	8.10811	0.038588	818836, 809292, 800485, 791615, 787982, 822682, 821489, 817654, 820495	93	566	13528	2.31301	1	0.296871	47.8308
GOTERM_BP_FAT	GO:0006308~DNA catabolic process	3	2.7027	0.0628094	809292, 791615, 787982	93	60	13528	7.27312	1	0.401664	65.7876
SP_PIR_KEYWORDS	oxidoreductase	7	6.30631	0.10335	818276, 809292, 783505, 787596, 791615, 787982, 821489	111	562	19235	2.1584	1	0.426466	76.073
GOTERM_BP_FAT	GO:0055114~oxidation reduction	7	6.30631	0.267826	818276, 809292, 783505, 787596, 791615, 787982, 821489	93	639	13528	1.59348	1	0.846141	99.4226
GOTERM_BP_FAT	GO:0006259~DNA metabolic process	5	4.5045	0.452746	818836, 775692, 809292, 791615, 787982	93	506	13528	1.43738	1	0.95556	99.9953
GOTERM_BP_FAT	GO:0006974~response to DNA damage stimulus	4	3.6036	0.467914	818836, 809292, 791615, 787982	93	373	13528	1.55992	1	0.959753	99.9971
Annotation Cluster 24	Enrichment Score: 1.5888591366119502
Category	Term	Count	%	PValue	Genes	List Total	Pop Hits	Pop Total	Fold Enrichment	Bonferroni	Benjamini	FDR
KEGG_PATHWAY	hsa04510:Focal adhesion	11	9.90991	2.75515e-05	825519, 823371, 826111, 784977, 778146, 788771, 789056, 798323, 817654, 820867, 804645	53	201	5085	5.25063	0.00209175	0.00209175	0.0289886
KEGG_PATHWAY	hsa04512:ECM-receptor interaction	7	6.30631	0.000188214	825565, 823371, 826111, 784977, 817654, 820867, 804645	53	84	5085	7.99528	0.0142038	0.00712728	0.19788
GOTERM_BP_FAT	GO:0007229~integrin-mediated signaling pathway	5	4.5045	0.00130387	775692, 826111, 784977, 794878, 820867	93	70	13528	10.3902	0.847427	0.0303513	2.13422
GOTERM_CC_FAT	GO:0008305~integrin complex	4	3.6036	0.00150718	826111, 784977, 794878, 820867	102	29	12782	17.2847	0.314139	0.0285895	1.94038
SP_PIR_KEYWORDS	heterodimer	5	4.5045	0.00289945	818352, 826111, 784977, 826073, 820867	111	103	19235	8.41205	0.536742	0.0280967	3.73516
GOTERM_BP_FAT	GO:0031589~cell-substrate adhesion	5	4.5045	0.00444719	775692, 823371, 826111, 784977, 820867	93	98	13528	7.42155	0.998376	0.0736106	7.10469
SP_PIR_KEYWORDS	host-virus interaction	7	6.30631	0.00594925	785252, 804583, 826111, 784977, 820867, 784099, 803569	111	285	19235	4.2562	0.794284	0.0530663	7.5246
KEGG_PATHWAY	hsa05222:Small cell lung cancer	5	4.5045	0.0102747	823371, 826111, 784977, 820867, 804645	53	84	5085	5.71092	0.543843	0.178176	10.2983
GOTERM_CC_FAT	GO:0043235~receptor complex	5	4.5045	0.0133969	826111, 784977, 814479, 794878, 820867	102	116	12782	5.40145	0.965675	0.106309	16.0724
GOTERM_CC_FAT	GO:0009986~cell surface	8	7.20721	0.0202586	826111, 784977, 814479, 826073, 817654, 820867, 784099, 804233	102	348	12782	2.88078	0.994004	0.120073	23.347
GOTERM_BP_FAT	GO:0007160~cell-matrix adhesion	4	3.6036	0.022707	775692, 826111, 784977, 820867	93	89	13528	6.53763	1	0.207914	31.599
SP_PIR_KEYWORDS	integrin	3	2.7027	0.0229865	826111, 784977, 820867	111	41	19235	12.6796	0.997893	0.165774	26.2781
SP_PIR_KEYWORDS	transmembrane protein	9	8.10811	0.0309783	825565, 826111, 784977, 814479, 826073, 812322, 820867, 789359, 803569	111	642	19235	2.42928	0.999761	0.20677	33.8039
KEGG_PATHWAY	hsa05200:Pathways in cancer	7	6.30631	0.115767	804583, 823371, 826111, 784977, 789056, 820867, 804645	53	328	5085	2.04757	0.999913	0.789534	72.6017
KEGG_PATHWAY	hsa05412:Arrhythmogenic right ventricular cardiomyopathy (ARVC)	3	2.7027	0.181978	826111, 784977, 820867	53	76	5085	3.78724	1	0.816621	87.9212
KEGG_PATHWAY	hsa05410:Hypertrophic cardiomyopathy (HCM)	3	2.7027	0.215582	826111, 784977, 820867	53	85	5085	3.38624	1	0.842034	92.2317
KEGG_PATHWAY	hsa05414:Dilated cardiomyopathy	3	2.7027	0.242117	826111, 784977, 820867	53	92	5085	3.12859	1	0.852714	94.5918
GOTERM_BP_FAT	GO:0007166~cell surface receptor linked signal transduction	13	11.7117	0.620994	794781, 826111, 784977, 814479, 794878, 820867, 794018, 775692, 796685, 826073, 782974, 791411, 804233	93	1856	13528	1.01886	1	0.991254	100
GOTERM_CC_FAT	GO:0005887~integral to plasma membrane	9	8.10811	0.732934	826111, 784977, 814479, 794878, 826073, 812322, 820867, 789359, 803569	102	1188	12782	0.949346	1	0.973407	100
GOTERM_CC_FAT	GO:0031226~intrinsic to plasma membrane	9	8.10811	0.755779	826111, 784977, 814479, 794878, 826073, 812322, 820867, 789359, 803569	102	1215	12782	0.92825	1	0.978305	100
SP_PIR_KEYWORDS	receptor	7	6.30631	0.898223	826111, 784977, 826073, 820867, 789359, 806127, 803569	111	1583	19235	0.766278	1	0.999194	100
UP_SEQ_FEATURE	topological domain:Extracellular	12	10.8108	0.926381	806556, 826111, 825863, 802187, 784977, 814479, 826073, 812322, 812401, 820867, 806127, 803569	111	2719	19113	0.759938	1	1	100
Annotation Cluster 25	Enrichment Score: 1.5433593200188696
Category	Term	Count	%	PValue	Genes	List Total	Pop Hits	Pop Total	Fold Enrichment	Bonferroni	Benjamini	FDR
GOTERM_CC_FAT	GO:0009897~external side of plasma membrane	7	6.30631	0.00226574	826111, 814479, 826073, 817654, 820867, 784099, 804233	102	170	12782	5.15998	0.432819	0.0370995	2.90376
GOTERM_BP_FAT	GO:0001568~blood vessel development	7	6.30631	0.00647491	775692, 814479, 794878, 817654, 819944, 820867, 804233	93	245	13528	4.15607	0.999914	0.0938347	10.1842
GOTERM_BP_FAT	GO:0001944~vasculature development	7	6.30631	0.00725971	775692, 814479, 794878, 817654, 819944, 820867, 804233	93	251	13528	4.05672	0.999972	0.100624	11.3501
GOTERM_BP_FAT	GO:0048514~blood vessel morphogenesis	6	5.40541	0.0144843	775692, 814479, 794878, 817654, 819944, 804233	93	211	13528	4.13637	1	0.154811	21.435
GOTERM_BP_FAT	GO:0032368~regulation of lipid transport	3	2.7027	0.017587	817654, 820867, 804233	93	30	13528	14.5462	1	0.181067	25.4264
GOTERM_CC_FAT	GO:0009986~cell surface	8	7.20721	0.0202586	826111, 784977, 814479, 826073, 817654, 820867, 784099, 804233	102	348	12782	2.88078	0.994004	0.120073	23.347
GOTERM_BP_FAT	GO:0031344~regulation of cell projection organization	4	3.6036	0.022707	804583, 826111, 819944, 804233	93	89	13528	6.53763	1	0.207914	31.599
GOTERM_BP_FAT	GO:0030334~regulation of cell migration	4	3.6036	0.10797	826111, 817654, 819944, 804233	93	169	13528	3.4429	1	0.559178	84.8804
GOTERM_BP_FAT	GO:0040012~regulation of locomotion	4	3.6036	0.142494	826111, 817654, 819944, 804233	93	192	13528	3.03047	1	0.65176	92.1278
GOTERM_BP_FAT	GO:0051270~regulation of cell motion	4	3.6036	0.144072	826111, 817654, 819944, 804233	93	193	13528	3.01476	1	0.654389	92.364
GOTERM_BP_FAT	GO:0001558~regulation of cell growth	3	2.7027	0.381193	775692, 819944, 804233	93	194	13528	2.24942	1	0.925007	99.9642
Annotation Cluster 26	Enrichment Score: 1.3290235395630732
Category	Term	Count	%	PValue	Genes	List Total	Pop Hits	Pop Total	Fold Enrichment	Bonferroni	Benjamini	FDR
SP_PIR_KEYWORDS	actin-binding	8	7.20721	0.000547684	775740, 778146, 801728, 788771, 794878, 783768, 820625, 797855	111	247	19235	5.61258	0.13513	0.00723252	0.715637
GOTERM_MF_FAT	GO:0003779~actin binding	8	7.20721	0.00989981	775740, 778146, 801728, 788771, 794878, 783768, 820625, 797855	96	326	12983	3.31876	0.960185	0.275557	12.5856
GOTERM_MF_FAT	GO:0008092~cytoskeletal protein binding	10	9.00901	0.0113888	795963, 775740, 778146, 801728, 788771, 794878, 783768, 820625, 804233, 797855	96	504	12983	2.68333	0.975551	0.286361	14.3463
SP_PIR_KEYWORDS	calmodulin-binding	3	2.7027	0.150379	794878, 783768, 797855	111	120	19235	4.33221	1	0.525066	88.1928
GOTERM_MF_FAT	GO:0005516~calmodulin binding	3	2.7027	0.273285	794878, 783768, 797855	96	140	12983	2.89799	1	0.94347	98.6644
GOTERM_CC_FAT	GO:0045202~synapse	5	4.5045	0.308369	775740, 784977, 794878, 783768, 797855	102	355	12782	1.76498	1	0.666239	99.1686
GOTERM_CC_FAT	GO:0015630~microtubule cytoskeleton	5	4.5045	0.635808	795963, 784611, 794878, 783768, 797855	102	549	12782	1.14129	1	0.941415	99.9998
Annotation Cluster 27	Enrichment Score: 1.2476728083885118
Category	Term	Count	%	PValue	Genes	List Total	Pop Hits	Pop Total	Fold Enrichment	Bonferroni	Benjamini	FDR
GOTERM_BP_FAT	GO:0031667~response to nutrient levels	5	4.5045	0.045295	792654, 826111, 791615, 787908, 803569	93	197	13528	3.69194	1	0.326477	53.5332
GOTERM_BP_FAT	GO:0010035~response to inorganic substance	5	4.5045	0.0510813	791615, 817654, 787908, 804233, 803569	93	205	13528	3.54786	1	0.350623	57.9769
GOTERM_BP_FAT	GO:0009991~response to extracellular stimulus	5	4.5045	0.0629742	792654, 826111, 791615, 787908, 803569	93	220	13528	3.30596	1	0.400812	65.887
GOTERM_BP_FAT	GO:0007584~response to nutrient	4	3.6036	0.0701187	792654, 826111, 787908, 803569	93	140	13528	4.15607	1	0.427204	69.9421
Annotation Cluster 28	Enrichment Score: 1.2291730690556752
Category	Term	Count	%	PValue	Genes	List Total	Pop Hits	Pop Total	Fold Enrichment	Bonferroni	Benjamini	FDR
GOTERM_BP_FAT	GO:0032101~regulation of response to external stimulus	7	6.30631	0.000743885	794018, 794781, 826111, 801761, 817654, 787908, 804233	93	159	13528	6.404	0.657792	0.0208067	1.22291
GOTERM_BP_FAT	GO:0032103~positive regulation of response to external stimulus	3	2.7027	0.0703166	794018, 826111, 817654	93	64	13528	6.81855	1	0.426444	70.0477
GOTERM_BP_FAT	GO:0048584~positive regulation of response to stimulus	3	2.7027	0.479041	794018, 826111, 817654	93	236	13528	1.8491	1	0.963434	99.9979
GOTERM_BP_FAT	GO:0002684~positive regulation of immune system process	3	2.7027	0.483472	794018, 826111, 817654	93	238	13528	1.83356	1	0.964571	99.9982
Annotation Cluster 29	Enrichment Score: 1.2187894255605993
Category	Term	Count	%	PValue	Genes	List Total	Pop Hits	Pop Total	Fold Enrichment	Bonferroni	Benjamini	FDR
GOTERM_BP_FAT	GO:0007517~muscle organ development	6	5.40541	0.0144843	825565, 784977, 778146, 814479, 783768, 820625	93	211	13528	4.13637	1	0.154811	21.435
GOTERM_BP_FAT	GO:0060537~muscle tissue development	4	3.6036	0.0534594	825565, 784977, 814479, 783768	93	125	13528	4.6548	1	0.362265	59.6847
GOTERM_BP_FAT	GO:0048738~cardiac muscle tissue development	3	2.7027	0.057373	825565, 784977, 783768	93	57	13528	7.65591	1	0.380176	62.3542
GOTERM_BP_FAT	GO:0007507~heart development	5	4.5045	0.0588597	825565, 784977, 814479, 814755, 783768	93	215	13528	3.38285	1	0.386365	63.324
GOTERM_BP_FAT	GO:0043009~chordate embryonic development	6	5.40541	0.0750098	825565, 788227, 784977, 788771, 794878, 783768	93	331	13528	2.63678	1	0.444708	72.4522
GOTERM_BP_FAT	GO:0009792~embryonic development ending in birth or egg hatching	6	5.40541	0.0772898	825565, 788227, 784977, 788771, 794878, 783768	93	334	13528	2.6131	1	0.453226	73.5537
GOTERM_BP_FAT	GO:0014706~striated muscle tissue development	3	2.7027	0.193994	825565, 784977, 783768	93	119	13528	3.66712	1	0.75027	97.173
Annotation Cluster 30	Enrichment Score: 1.1976036544536355
Category	Term	Count	%	PValue	Genes	List Total	Pop Hits	Pop Total	Fold Enrichment	Bonferroni	Benjamini	FDR
GOTERM_CC_FAT	GO:0043005~neuron projection	7	6.30631	0.0536947	795963, 826111, 796443, 783768, 791615, 826073, 804233	102	342	12782	2.5649	0.999999	0.249825	51.1771
GOTERM_CC_FAT	GO:0030426~growth cone	3	2.7027	0.0678694	795963, 796443, 783768	102	54	12782	6.96187	1	0.28673	59.8695
GOTERM_CC_FAT	GO:0030427~site of polarized growth	3	2.7027	0.0700783	795963, 796443, 783768	102	55	12782	6.83529	1	0.290157	61.0876
Annotation Cluster 31	Enrichment Score: 1.1675611334312102
Category	Term	Count	%	PValue	Genes	List Total	Pop Hits	Pop Total	Fold Enrichment	Bonferroni	Benjamini	FDR
GOTERM_MF_FAT	GO:0016671~oxidoreductase activity, acting on sulfur group of donors, disulfide as acceptor	3	2.7027	0.00184462	809292, 787982, 821489	96	9	12983	45.0799	0.450204	0.112762	2.46528
UP_SEQ_FEATURE	binding site:FAD	3	2.7027	0.0070331	809292, 787982, 821489	111	22	19113	23.4803	0.994335	0.276274	10.1559
SP_PIR_KEYWORDS	Redox-active center	3	2.7027	0.024047	809292, 787982, 821489	111	42	19235	12.3777	0.99842	0.16831	27.3203
GOTERM_MF_FAT	GO:0016667~oxidoreductase activity, acting on sulfur group of donors	3	2.7027	0.0329447	809292, 787982, 821489	96	39	12983	10.403	0.999981	0.492555	36.4222
GOTERM_MF_FAT	GO:0050660~FAD binding	3	2.7027	0.0974898	809292, 787982, 821489	96	72	12983	5.63498	1	0.810188	75.0125
SP_PIR_KEYWORDS	oxidoreductase	7	6.30631	0.10335	818276, 809292, 783505, 787596, 791615, 787982, 821489	111	562	19235	2.1584	1	0.426466	76.073
GOTERM_MF_FAT	GO:0048037~cofactor binding	5	4.5045	0.109682	809292, 790389, 783505, 787982, 821489	96	249	12983	2.71565	1	0.791617	79.2095
SP_PIR_KEYWORDS	Flavoprotein	3	2.7027	0.125099	809292, 787982, 821489	111	107	19235	4.85855	1	0.474773	82.6587
SP_PIR_KEYWORDS	FAD	3	2.7027	0.138582	809292, 787982, 821489	111	114	19235	4.56022	1	0.500192	85.8532
GOTERM_BP_FAT	GO:0055114~oxidation reduction	7	6.30631	0.267826	818276, 809292, 783505, 787596, 791615, 787982, 821489	93	639	13528	1.59348	1	0.846141	99.4226
GOTERM_MF_FAT	GO:0050662~coenzyme binding	3	2.7027	0.38301	809292, 787982, 821489	96	181	12983	2.24154	1	0.973711	99.8539
GOTERM_MF_FAT	GO:0009055~electron carrier activity	3	2.7027	0.482994	809292, 787982, 821489	96	221	12983	1.83583	1	0.988356	99.9866
Annotation Cluster 32	Enrichment Score: 1.101030282621433
Category	Term	Count	%	PValue	Genes	List Total	Pop Hits	Pop Total	Fold Enrichment	Bonferroni	Benjamini	FDR
GOTERM_MF_FAT	GO:0042802~identical protein binding	13	11.7117	0.00238997	826111, 784977, 784511, 814479, 826877, 794878, 795963, 777548, 811688, 780448, 791615, 817654, 804233	96	640	12983	2.74705	0.539423	0.121213	3.18328
GOTERM_MF_FAT	GO:0042803~protein homodimerization activity	6	5.40541	0.0980859	795963, 814479, 826877, 794878, 791615, 804233	96	334	12983	2.42945	1	0.796641	75.2347
GOTERM_MF_FAT	GO:0046983~protein dimerization activity	8	7.20721	0.101915	795963, 826111, 784977, 814479, 826877, 794878, 791615, 804233	96	542	12983	1.99616	1	0.780021	76.6192
GOTERM_BP_FAT	GO:0003013~circulatory system process	3	2.7027	0.361664	814479, 791615, 804233	93	186	13528	2.34617	1	0.913723	99.9402
GOTERM_BP_FAT	GO:0008015~blood circulation	3	2.7027	0.361664	814479, 791615, 804233	93	186	13528	2.34617	1	0.913723	99.9402
Annotation Cluster 33	Enrichment Score: 1.0884897700857212
Category	Term	Count	%	PValue	Genes	List Total	Pop Hits	Pop Total	Fold Enrichment	Bonferroni	Benjamini	FDR
GOTERM_BP_FAT	GO:0032101~regulation of response to external stimulus	7	6.30631	0.000743885	794018, 794781, 826111, 801761, 817654, 787908, 804233	93	159	13528	6.404	0.657792	0.0208067	1.22291
GOTERM_CC_FAT	GO:0009897~external side of plasma membrane	7	6.30631	0.00226574	826111, 814479, 826073, 817654, 820867, 784099, 804233	102	170	12782	5.15998	0.432819	0.0370995	2.90376
GOTERM_BP_FAT	GO:0051241~negative regulation of multicellular organismal process	6	5.40541	0.00519049	794781, 801761, 811688, 791615, 817654, 804233	93	164	13528	5.32179	0.999446	0.080806	8.24486
GOTERM_CC_FAT	GO:0043025~cell soma	6	5.40541	0.0106319	795963, 783768, 791615, 826073, 819944, 804233	102	168	12782	4.47549	0.930901	0.0942308	12.9649
GOTERM_CC_FAT	GO:0009986~cell surface	8	7.20721	0.0202586	826111, 784977, 814479, 826073, 817654, 820867, 784099, 804233	102	348	12782	2.88078	0.994004	0.120073	23.347
GOTERM_BP_FAT	GO:0030193~regulation of blood coagulation	3	2.7027	0.0248108	794781, 817654, 804233	93	36	13528	12.1219	1	0.215709	33.9933
GOTERM_MF_FAT	GO:0008034~lipoprotein binding	3	2.7027	0.0269551	826073, 817654, 804233	96	35	12983	11.592	0.999857	0.445796	30.8871
GOTERM_BP_FAT	GO:0050818~regulation of coagulation	3	2.7027	0.0315964	794781, 817654, 804233	93	41	13528	10.6436	1	0.255233	41.1907
GOTERM_BP_FAT	GO:0019220~regulation of phosphate metabolic process	8	7.20721	0.0470206	794781, 826111, 814479, 784611, 791615, 826073, 817654, 804233	93	485	13528	2.39938	1	0.333594	54.9026
GOTERM_BP_FAT	GO:0051174~regulation of phosphorus metabolic process	8	7.20721	0.0470206	794781, 826111, 814479, 784611, 791615, 826073, 817654, 804233	93	485	13528	2.39938	1	0.333594	54.9026
GOTERM_BP_FAT	GO:0010035~response to inorganic substance	5	4.5045	0.0510813	791615, 817654, 787908, 804233, 803569	93	205	13528	3.54786	1	0.350623	57.9769
GOTERM_CC_FAT	GO:0043005~neuron projection	7	6.30631	0.0536947	795963, 826111, 796443, 783768, 791615, 826073, 804233	102	342	12782	2.5649	0.999999	0.249825	51.1771
GOTERM_BP_FAT	GO:0042325~regulation of phosphorylation	7	6.30631	0.0975997	794781, 814479, 784611, 791615, 826073, 817654, 804233	93	466	13528	2.18506	1	0.526407	81.6963
GOTERM_CC_FAT	GO:0030425~dendrite	4	3.6036	0.138416	783768, 791615, 826073, 804233	102	163	12782	3.07518	1	0.431257	85.5637
GOTERM_BP_FAT	GO:0042327~positive regulation of phosphorylation	3	2.7027	0.141086	794781, 814479, 817654	93	97	13528	4.49884	1	0.64957	91.9113
GOTERM_BP_FAT	GO:0045937~positive regulation of phosphate metabolic process	3	2.7027	0.148108	794781, 814479, 817654	93	100	13528	4.36387	1	0.661909	92.938
GOTERM_BP_FAT	GO:0010562~positive regulation of phosphorus metabolic process	3	2.7027	0.148108	794781, 814479, 817654	93	100	13528	4.36387	1	0.661909	92.938
GOTERM_BP_FAT	GO:0043405~regulation of MAP kinase activity	3	2.7027	0.248976	791615, 817654, 804233	93	141	13528	3.09494	1	0.823343	99.121
GOTERM_BP_FAT	GO:0050865~regulation of cell activation	3	2.7027	0.334465	791615, 817654, 804233	93	175	13528	2.49364	1	0.899829	99.8808
GOTERM_BP_FAT	GO:0008283~cell proliferation	5	4.5045	0.344749	795963, 826111, 809797, 783768, 826073	93	436	13528	1.66815	1	0.905684	99.9079
GOTERM_BP_FAT	GO:0003013~circulatory system process	3	2.7027	0.361664	814479, 791615, 804233	93	186	13528	2.34617	1	0.913723	99.9402
GOTERM_BP_FAT	GO:0008015~blood circulation	3	2.7027	0.361664	814479, 791615, 804233	93	186	13528	2.34617	1	0.913723	99.9402
GOTERM_BP_FAT	GO:0045859~regulation of protein kinase activity	4	3.6036	0.417651	791615, 826073, 817654, 804233	93	345	13528	1.68652	1	0.94178	99.9869
GOTERM_BP_FAT	GO:0043549~regulation of kinase activity	4	3.6036	0.439396	791615, 826073, 817654, 804233	93	357	13528	1.62983	1	0.951277	99.993
GOTERM_BP_FAT	GO:0045860~positive regulation of protein kinase activity	3	2.7027	0.449703	791615, 826073, 817654	93	223	13528	1.95689	1	0.954773	99.9949
GOTERM_BP_FAT	GO:0051338~regulation of transferase activity	4	3.6036	0.466149	791615, 826073, 817654, 804233	93	372	13528	1.56411	1	0.959989	99.9969
GOTERM_BP_FAT	GO:0033674~positive regulation of kinase activity	3	2.7027	0.467867	791615, 826073, 817654	93	231	13528	1.88912	1	0.960191	99.997
GOTERM_BP_FAT	GO:0051347~positive regulation of transferase activity	3	2.7027	0.487879	791615, 826073, 817654	93	240	13528	1.81828	1	0.965669	99.9984
Annotation Cluster 34	Enrichment Score: 1.0859398403895226
Category	Term	Count	%	PValue	Genes	List Total	Pop Hits	Pop Total	Fold Enrichment	Bonferroni	Benjamini	FDR
GOTERM_BP_FAT	GO:0010648~negative regulation of cell communication	6	5.40541	0.0269605	814479, 801761, 811688, 826073, 817654, 791411	93	248	13528	3.51925	1	0.228255	36.3585
GOTERM_BP_FAT	GO:0017015~regulation of transforming growth factor beta receptor signaling pathway	3	2.7027	0.0288025	814479, 817654, 791411	93	39	13528	11.1894	1	0.24062	38.3214
GOTERM_BP_FAT	GO:0009968~negative regulation of signal transduction	5	4.5045	0.063815	814479, 801761, 826073, 817654, 791411	93	221	13528	3.291	1	0.403352	66.3896
GOTERM_BP_FAT	GO:0008285~negative regulation of cell proliferation	5	4.5045	0.230856	797658, 814479, 817654, 791411, 804233	93	361	13528	2.01471	1	0.800011	98.6963
GOTERM_BP_FAT	GO:0009967~positive regulation of signal transduction	4	3.6036	0.324996	814479, 817654, 791411, 813535	93	295	13528	1.97237	1	0.893393	99.8495
Annotation Cluster 35	Enrichment Score: 1.0813378066973103
Category	Term	Count	%	PValue	Genes	List Total	Pop Hits	Pop Total	Fold Enrichment	Bonferroni	Benjamini	FDR
GOTERM_CC_FAT	GO:0044429~mitochondrial part	10	9.00901	0.0454738	785252, 809292, 795339, 783247, 788949, 787596, 791615, 787982, 790625, 816597	102	595	12782	2.10611	0.999991	0.219292	45.3708
SP_PIR_KEYWORDS	mitochondrion	10	9.00901	0.0489536	785252, 809292, 795339, 783247, 788949, 826877, 787596, 787982, 790625, 816597	111	832	19235	2.08279	0.999998	0.288978	48.2126
SP_PIR_KEYWORDS	transit peptide	7	6.30631	0.0556627	785252, 809292, 788949, 826877, 787596, 787982, 790625	111	476	19235	2.54836	1	0.303271	52.8027
GOTERM_CC_FAT	GO:0031980~mitochondrial lumen	5	4.5045	0.105183	785252, 788949, 787596, 791615, 790625	102	227	12782	2.76021	1	0.365853	76.3961
GOTERM_CC_FAT	GO:0005759~mitochondrial matrix	5	4.5045	0.105183	785252, 788949, 787596, 791615, 790625	102	227	12782	2.76021	1	0.365853	76.3961
UP_SEQ_FEATURE	transit peptide:Mitochondrion	6	5.40541	0.132276	809292, 788949, 826877, 787596, 787982, 790625	111	467	19113	2.21228	1	0.981684	88.3849
GOTERM_CC_FAT	GO:0005739~mitochondrion	13	11.7117	0.148646	809292, 783247, 788949, 787596, 826877, 816597, 785252, 795339, 811688, 791615, 790625, 787982, 803569	102	1087	12782	1.49869	1	0.446584	87.6387
Annotation Cluster 36	Enrichment Score: 1.0591302330506214
Category	Term	Count	%	PValue	Genes	List Total	Pop Hits	Pop Total	Fold Enrichment	Bonferroni	Benjamini	FDR
GOTERM_MF_FAT	GO:0005509~calcium ion binding	16	14.4144	0.00264927	794781, 826111, 802187, 820867, 813535, 825519, 800485, 809797, 814755, 826073, 798323, 817654, 803417, 806127, 797855, 823969	96	919	12983	2.35455	0.576627	0.115547	3.52294
SP_PIR_KEYWORDS	metal-binding	24	21.6216	0.0766008	818276, 794153, 795829, 818352, 778543, 784511, 788949, 790175, 799578, 790215, 779157, 813535, 781129, 809326, 785252, 818676, 777548, 780030, 809797, 791615, 826073, 806310, 791411, 782395	111	2972	19235	1.39937	1	0.361949	64.8232
GOTERM_MF_FAT	GO:0046872~metal ion binding	37	33.3333	0.125709	778543, 802187, 784511, 790175, 779157, 820867, 809326, 818676, 780030, 783505, 809797, 791615, 798323, 806127, 791411, 823969, 797855, 818276, 794781, 794153, 795829, 818352, 826111, 788949, 799578, 790215, 813535, 781129, 825519, 800485, 806310, 826073, 814755, 817654, 803417, 782395, 804233	96	4140	12983	1.20866	1	0.812525	83.7369
GOTERM_MF_FAT	GO:0043169~cation binding	37	33.3333	0.139426	778543, 802187, 784511, 790175, 779157, 820867, 809326, 818676, 780030, 783505, 809797, 791615, 798323, 806127, 791411, 823969, 797855, 818276, 794781, 794153, 795829, 818352, 826111, 788949, 799578, 790215, 813535, 781129, 825519, 800485, 806310, 826073, 814755, 817654, 803417, 782395, 804233	96	4179	12983	1.19738	1	0.835011	86.8674
GOTERM_MF_FAT	GO:0043167~ion binding	37	33.3333	0.163152	778543, 802187, 784511, 790175, 779157, 820867, 809326, 818676, 780030, 783505, 809797, 791615, 798323, 806127, 791411, 823969, 797855, 818276, 794781, 794153, 795829, 818352, 826111, 788949, 799578, 790215, 813535, 781129, 825519, 800485, 806310, 826073, 814755, 817654, 803417, 782395, 804233	96	4241	12983	1.17988	1	0.872675	91.0008
GOTERM_MF_FAT	GO:0046914~transition metal ion binding	19	17.1171	0.761301	818276, 794153, 818352, 795829, 778543, 784511, 788949, 790175, 790215, 779157, 813535, 781129, 809326, 818676, 783505, 780030, 791615, 791411, 782395	96	2785	12983	0.92264	1	0.999815	100
Annotation Cluster 37	Enrichment Score: 1.0481502685618402
Category	Term	Count	%	PValue	Genes	List Total	Pop Hits	Pop Total	Fold Enrichment	Bonferroni	Benjamini	FDR
GOTERM_BP_FAT	GO:0006953~acute-phase response	5	4.5045	0.000151792	794781, 801761, 780030, 787908, 803569	93	40	13528	18.1828	0.196476	0.00605793	0.250688
UP_SEQ_FEATURE	glycosylation site:O-linked (GalNAc...)	4	3.6036	0.0160832	801761, 780030, 804233, 803569	111	92	19113	7.48649	0.999993	0.483286	21.8096
GOTERM_BP_FAT	GO:0006879~cellular iron ion homeostasis	3	2.7027	0.0187177	780030, 791615, 803569	93	31	13528	14.077	1	0.186388	26.833
GOTERM_BP_FAT	GO:0030005~cellular di-, tri-valent inorganic cation homeostasis	6	5.40541	0.0192597	794781, 780030, 791615, 813535, 804233, 803569	93	227	13528	3.84482	1	0.189988	27.4983
GOTERM_BP_FAT	GO:0055066~di-, tri-valent inorganic cation homeostasis	6	5.40541	0.0234537	794781, 780030, 791615, 813535, 804233, 803569	93	239	13528	3.65177	1	0.2114	32.458
GOTERM_BP_FAT	GO:0055072~iron ion homeostasis	3	2.7027	0.0248108	780030, 791615, 803569	93	36	13528	12.1219	1	0.215709	33.9933
GOTERM_BP_FAT	GO:0030003~cellular cation homeostasis	6	5.40541	0.0294753	794781, 780030, 791615, 813535, 804233, 803569	93	254	13528	3.43612	1	0.24418	39.0242
GOTERM_BP_FAT	GO:0019725~cellular homeostasis	8	7.20721	0.0393019	794781, 809292, 780030, 791615, 787982, 813535, 804233, 803569	93	466	13528	2.49721	1	0.298448	48.4676
GOTERM_BP_FAT	GO:0055080~cation homeostasis	6	5.40541	0.0453681	794781, 780030, 791615, 813535, 804233, 803569	93	286	13528	3.05166	1	0.325348	53.592
GOTERM_BP_FAT	GO:0006873~cellular ion homeostasis	6	5.40541	0.111194	794781, 780030, 791615, 813535, 804233, 803569	93	374	13528	2.33362	1	0.568674	85.7591
GOTERM_BP_FAT	GO:0055082~cellular chemical homeostasis	6	5.40541	0.116822	794781, 780030, 791615, 813535, 804233, 803569	93	380	13528	2.29677	1	0.58598	87.179
GOTERM_BP_FAT	GO:0042592~homeostatic process	9	8.10811	0.13814	794781, 809292, 826111, 780030, 791615, 787982, 813535, 804233, 803569	93	751	13528	1.74322	1	0.642962	91.4401
GOTERM_BP_FAT	GO:0050801~ion homeostasis	6	5.40541	0.145872	794781, 780030, 791615, 813535, 804233, 803569	93	409	13528	2.13392	1	0.657588	92.6252
GOTERM_BP_FAT	GO:0048878~chemical homeostasis	6	5.40541	0.268863	794781, 780030, 791615, 813535, 804233, 803569	93	512	13528	1.70464	1	0.846251	99.436
GOTERM_BP_FAT	GO:0015674~di-, tri-valent inorganic cation transport	3	2.7027	0.336952	794781, 780030, 813535	93	176	13528	2.47947	1	0.901032	99.888
GOTERM_BP_FAT	GO:0006874~cellular calcium ion homeostasis	3	2.7027	0.354283	794781, 813535, 804233	93	183	13528	2.38463	1	0.909794	99.9277
GOTERM_BP_FAT	GO:0055074~calcium ion homeostasis	3	2.7027	0.366568	794781, 813535, 804233	93	188	13528	2.32121	1	0.916498	99.9474
GOTERM_BP_FAT	GO:0006875~cellular metal ion homeostasis	3	2.7027	0.386038	794781, 813535, 804233	93	196	13528	2.22646	1	0.927412	99.9686
GOTERM_BP_FAT	GO:0055065~metal ion homeostasis	3	2.7027	0.407634	794781, 813535, 804233	93	205	13528	2.12872	1	0.936956	99.9826
GOTERM_BP_FAT	GO:0030001~metal ion transport	3	2.7027	0.829821	794781, 780030, 813535	93	465	13528	0.938467	1	0.999741	100
GOTERM_BP_FAT	GO:0006812~cation transport	3	2.7027	0.895014	794781, 780030, 813535	93	553	13528	0.789127	1	0.999969	100
GOTERM_BP_FAT	GO:0006811~ion transport	4	3.6036	0.900492	794781, 795339, 780030, 813535	93	768	13528	0.757616	1	0.999974	100
Annotation Cluster 38	Enrichment Score: 1.0265283470245479
Category	Term	Count	%	PValue	Genes	List Total	Pop Hits	Pop Total	Fold Enrichment	Bonferroni	Benjamini	FDR
GOTERM_CC_FAT	GO:0031594~neuromuscular junction	3	2.7027	0.012884	784977, 794878, 783768	102	22	12782	17.0882	0.960912	0.105769	15.5038
GOTERM_BP_FAT	GO:0043009~chordate embryonic development	6	5.40541	0.0750098	825565, 788227, 784977, 788771, 794878, 783768	93	331	13528	2.63678	1	0.444708	72.4522
GOTERM_BP_FAT	GO:0009792~embryonic development ending in birth or egg hatching	6	5.40541	0.0772898	825565, 788227, 784977, 788771, 794878, 783768	93	334	13528	2.6131	1	0.453226	73.5537
GOTERM_BP_FAT	GO:0001701~in utero embryonic development	4	3.6036	0.118097	788227, 784977, 794878, 783768	93	176	13528	3.30596	1	0.588408	87.4817
GOTERM_BP_FAT	GO:0051146~striated muscle cell differentiation	3	2.7027	0.120501	784977, 794878, 783768	93	88	13528	4.95894	1	0.594477	88.034
GOTERM_BP_FAT	GO:0042692~muscle cell differentiation	3	2.7027	0.198934	784977, 794878, 783768	93	121	13528	3.6065	1	0.758426	97.4462
GOTERM_CC_FAT	GO:0045202~synapse	5	4.5045	0.308369	775740, 784977, 794878, 783768, 797855	102	355	12782	1.76498	1	0.666239	99.1686
Annotation Cluster 39	Enrichment Score: 0.9261709686687476
Category	Term	Count	%	PValue	Genes	List Total	Pop Hits	Pop Total	Fold Enrichment	Bonferroni	Benjamini	FDR
GOTERM_CC_FAT	GO:0031410~cytoplasmic vesicle	10	9.00901	0.0670538	784977, 811688, 780030, 783505, 791615, 826073, 817654, 787908, 803569, 797855	102	642	12782	1.95193	1	0.288396	59.411
GOTERM_CC_FAT	GO:0031091~platelet alpha granule	3	2.7027	0.0723107	811688, 817654, 787908	102	56	12782	6.71324	1	0.293543	62.2838
GOTERM_CC_FAT	GO:0031982~vesicle	10	9.00901	0.0825707	784977, 811688, 780030, 783505, 791615, 826073, 817654, 787908, 803569, 797855	102	670	12782	1.87035	1	0.324111	67.3576
GOTERM_CC_FAT	GO:0016023~cytoplasmic membrane-bounded vesicle	8	7.20721	0.144455	784977, 811688, 780030, 783505, 826073, 817654, 787908, 803569	102	550	12782	1.82275	1	0.441305	86.8244
GOTERM_CC_FAT	GO:0048770~pigment granule	3	2.7027	0.15615	784977, 783505, 803569	102	89	12782	4.22406	1	0.459439	88.9817
GOTERM_CC_FAT	GO:0042470~melanosome	3	2.7027	0.15615	784977, 783505, 803569	102	89	12782	4.22406	1	0.459439	88.9817
GOTERM_CC_FAT	GO:0031988~membrane-bounded vesicle	8	7.20721	0.162203	784977, 811688, 780030, 783505, 826073, 817654, 787908, 803569	102	568	12782	1.76498	1	0.463757	89.9655
GOTERM_CC_FAT	GO:0030141~secretory granule	4	3.6036	0.170335	811688, 780030, 817654, 787908	102	180	12782	2.78475	1	0.477107	91.1596
Annotation Cluster 40	Enrichment Score: 0.8215095224376182
Category	Term	Count	%	PValue	Genes	List Total	Pop Hits	Pop Total	Fold Enrichment	Bonferroni	Benjamini	FDR
GOTERM_CC_FAT	GO:0005938~cell cortex	5	4.5045	0.0284512	795963, 778543, 778146, 794878, 783768	102	146	12782	4.29157	0.999265	0.154488	31.2689
GOTERM_BP_FAT	GO:0030705~cytoskeleton-dependent intracellular transport	3	2.7027	0.0487093	795963, 794878, 783768	93	52	13528	8.39206	1	0.341872	56.2059
GOTERM_BP_FAT	GO:0051656~establishment of organelle localization	3	2.7027	0.0800874	795963, 794878, 783768	93	69	13528	6.32445	1	0.462083	74.8487
GOTERM_BP_FAT	GO:0051640~organelle localization	3	2.7027	0.129554	795963, 794878, 783768	93	92	13528	4.74334	1	0.621135	89.9157
GOTERM_CC_FAT	GO:0005819~spindle	3	2.7027	0.323989	795963, 794878, 783768	102	147	12782	2.55742	1	0.683871	99.3821
GOTERM_BP_FAT	GO:0051301~cell division	3	2.7027	0.599582	795963, 794878, 783768	93	295	13528	1.47928	1	0.989075	100
GOTERM_CC_FAT	GO:0015630~microtubule cytoskeleton	5	4.5045	0.635808	795963, 784611, 794878, 783768, 797855	102	549	12782	1.14129	1	0.941415	99.9998
Annotation Cluster 41	Enrichment Score: 0.8010994329327679
Category	Term	Count	%	PValue	Genes	List Total	Pop Hits	Pop Total	Fold Enrichment	Bonferroni	Benjamini	FDR
GOTERM_CC_FAT	GO:0031975~envelope	10	9.00901	0.0571982	795963, 797658, 809292, 795339, 826111, 783247, 822806, 787982, 816597, 819944	102	622	12782	2.01469	1	0.255093	53.4739
GOTERM_CC_FAT	GO:0031967~organelle envelope	9	8.10811	0.116923	795963, 797658, 809292, 795339, 783247, 822806, 787982, 816597, 819944	102	620	12782	1.81907	1	0.384742	80.1175
GOTERM_CC_FAT	GO:0005635~nuclear envelope	4	3.6036	0.220564	795963, 797658, 822806, 819944	102	205	12782	2.44515	1	0.554716	96.0725
GOTERM_CC_FAT	GO:0005740~mitochondrial envelope	5	4.5045	0.423433	809292, 795339, 783247, 787982, 816597	102	419	12782	1.49539	1	0.798259	99.9218
Annotation Cluster 42	Enrichment Score: 0.740426306528993
Category	Term	Count	%	PValue	Genes	List Total	Pop Hits	Pop Total	Fold Enrichment	Bonferroni	Benjamini	FDR
GOTERM_CC_FAT	GO:0019867~outer membrane	4	3.6036	0.0539398	795339, 826111, 783247, 816597	102	108	12782	4.64125	0.999999	0.246408	51.3412
SP_PIR_KEYWORDS	mitochondrion outer membrane	3	2.7027	0.0608763	795339, 783247, 816597	111	70	19235	7.42664	1	0.314959	56.1069
GOTERM_CC_FAT	GO:0005741~mitochondrial outer membrane	3	2.7027	0.158919	795339, 783247, 816597	102	90	12782	4.17712	1	0.461032	89.4423
GOTERM_CC_FAT	GO:0031968~organelle outer membrane	3	2.7027	0.198521	795339, 783247, 816597	102	104	12782	3.61482	1	0.526509	94.3575
GOTERM_CC_FAT	GO:0005740~mitochondrial envelope	5	4.5045	0.423433	809292, 795339, 783247, 787982, 816597	102	419	12782	1.49539	1	0.798259	99.9218
GOTERM_CC_FAT	GO:0031966~mitochondrial membrane	3	2.7027	0.822842	795339, 783247, 816597	102	394	12782	0.954165	1	0.990462	100
Annotation Cluster 43	Enrichment Score: 0.6818491881482411
Category	Term	Count	%	PValue	Genes	List Total	Pop Hits	Pop Total	Fold Enrichment	Bonferroni	Benjamini	FDR
UP_SEQ_FEATURE	domain:PDZ	3	2.7027	0.132187	795829, 790175, 797855	111	110	19113	4.69607	1	0.984345	88.3667
INTERPRO	IPR001478:PDZ/DHR/GLGF	3	2.7027	0.251611	795829, 790175, 797855	109	149	16659	3.07721	1	0.994215	97.9982
SMART	SM00228:PDZ	3	2.7027	0.270729	795829, 790175, 797855	63	149	9079	2.90157	1	0.979631	96.328
Annotation Cluster 44	Enrichment Score: 0.6531121086435985
Category	Term	Count	%	PValue	Genes	List Total	Pop Hits	Pop Total	Fold Enrichment	Bonferroni	Benjamini	FDR
GOTERM_BP_FAT	GO:0042060~wound healing	5	4.5045	0.0412112	794781, 826111, 814479, 811688, 783768	93	191	13528	3.80792	1	0.304508	50.1351
GOTERM_BP_FAT	GO:0050817~coagulation	3	2.7027	0.152829	794781, 826111, 811688	93	102	13528	4.2783	1	0.670968	93.558
GOTERM_BP_FAT	GO:0007596~blood coagulation	3	2.7027	0.152829	794781, 826111, 811688	93	102	13528	4.2783	1	0.670968	93.558
GOTERM_BP_FAT	GO:0007599~hemostasis	3	2.7027	0.167163	794781, 826111, 811688	93	108	13528	4.04062	1	0.703194	95.1418
GOTERM_BP_FAT	GO:0050878~regulation of body fluid levels	3	2.7027	0.248976	794781, 826111, 811688	93	141	13528	3.09494	1	0.823343	99.121
GOTERM_BP_FAT	GO:0051345~positive regulation of hydrolase activity	3	2.7027	0.344397	818836, 794781, 826111	93	179	13528	2.43792	1	0.906264	99.9071
GOTERM_BP_FAT	GO:0008104~protein localization	8	7.20721	0.393303	818836, 794781, 825565, 826111, 778146, 811688, 794878, 803417	93	882	13528	1.31939	1	0.929857	99.9742
GOTERM_BP_FAT	GO:0051336~regulation of hydrolase activity	4	3.6036	0.403011	795963, 818836, 794781, 826111	93	337	13528	1.72656	1	0.93497	99.9802
GOTERM_BP_FAT	GO:0045184~establishment of protein localization	6	5.40541	0.605566	818836, 794781, 826111, 811688, 794878, 803417	93	769	13528	1.13495	1	0.989535	100
Annotation Cluster 45	Enrichment Score: 0.6476236890106282
Category	Term	Count	%	PValue	Genes	List Total	Pop Hits	Pop Total	Fold Enrichment	Bonferroni	Benjamini	FDR
GOTERM_BP_FAT	GO:0008406~gonad development	3	2.7027	0.176846	794153, 801761, 791615	93	112	13528	3.89631	1	0.723738	95.9959
GOTERM_BP_FAT	GO:0048608~reproductive structure development	3	2.7027	0.211348	794153, 801761, 791615	93	126	13528	3.46339	1	0.777003	98.0274
GOTERM_BP_FAT	GO:0045137~development of primary sexual characteristics	3	2.7027	0.21384	794153, 801761, 791615	93	127	13528	3.43612	1	0.779964	98.128
GOTERM_BP_FAT	GO:0003006~reproductive developmental process	4	3.6036	0.263704	795963, 794153, 801761, 791615	93	262	13528	2.2208	1	0.842086	99.3665
GOTERM_BP_FAT	GO:0007548~sex differentiation	3	2.7027	0.274209	794153, 801761, 791615	93	151	13528	2.88998	1	0.851681	99.5005
Annotation Cluster 46	Enrichment Score: 0.6014928897013098
Category	Term	Count	%	PValue	Genes	List Total	Pop Hits	Pop Total	Fold Enrichment	Bonferroni	Benjamini	FDR
GOTERM_CC_FAT	GO:0043005~neuron projection	7	6.30631	0.0536947	795963, 826111, 796443, 783768, 791615, 826073, 804233	102	342	12782	2.5649	0.999999	0.249825	51.1771
GOTERM_BP_FAT	GO:0050877~neurological system process	11	9.90991	0.306955	795963, 809326, 795339, 818676, 826111, 783768, 791615, 790215, 820495, 779157, 804233	93	1210	13528	1.32239	1	0.880198	99.7672
GOTERM_BP_FAT	GO:0050890~cognition	4	3.6036	0.951734	795963, 795339, 826111, 791615	93	909	13528	0.640098	1	0.999999	100
Annotation Cluster 47	Enrichment Score: 0.5894636568163787
Category	Term	Count	%	PValue	Genes	List Total	Pop Hits	Pop Total	Fold Enrichment	Bonferroni	Benjamini	FDR
UP_SEQ_FEATURE	domain:Ig-like C2-type 5	3	2.7027	0.0399969	825565, 785547, 801728	111	55	19113	9.39214	1	0.775978	46.1715
UP_SEQ_FEATURE	domain:Ig-like C2-type 4	3	2.7027	0.0710709	825565, 785547, 801728	111	76	19113	6.79694	1	0.914249	67.3276
UP_SEQ_FEATURE	domain:Ig-like C2-type 3	3	2.7027	0.155907	825565, 785547, 801728	111	122	19113	4.23416	1	0.989962	92.3604
INTERPRO	IPR013098:Immunoglobulin I-set	3	2.7027	0.225261	825565, 785547, 801728	109	138	16659	3.3225	1	0.993931	96.8069
UP_SEQ_FEATURE	domain:Ig-like C2-type 1	3	2.7027	0.298846	825565, 785547, 801728	111	190	19113	2.71878	1	0.999873	99.5424
UP_SEQ_FEATURE	domain:Ig-like C2-type 2	3	2.7027	0.300971	825565, 785547, 801728	111	191	19113	2.70454	1	0.999841	99.563
INTERPRO	IPR003598:Immunoglobulin subtype 2	3	2.7027	0.3845	825565, 785547, 801728	109	205	16659	2.23661	1	0.999576	99.8569
SMART	SM00408:IGc2	3	2.7027	0.41017	825565, 785547, 801728	63	205	9079	2.10894	1	0.996231	99.6016
INTERPRO	IPR013783:Immunoglobulin-like fold	5	4.5045	0.484103	825565, 800485, 778146, 785547, 801728	109	553	16659	1.38187	1	0.999853	99.9868
INTERPRO	IPR007110:Immunoglobulin-like	4	3.6036	0.634748	825565, 800485, 785547, 801728	109	501	16659	1.22024	1	0.999997	99.9999
SP_PIR_KEYWORDS	Immunoglobulin domain	3	2.7027	0.753804	825565, 800485, 801728	111	470	19235	1.1061	1	0.99037	100
Annotation Cluster 48	Enrichment Score: 0.57823369014202
Category	Term	Count	%	PValue	Genes	List Total	Pop Hits	Pop Total	Fold Enrichment	Bonferroni	Benjamini	FDR
GOTERM_CC_FAT	GO:0005856~cytoskeleton	15	13.5135	0.198648	795829, 778543, 784511, 788771, 796443, 783768, 794878, 795963, 825519, 778146, 801728, 784611, 798323, 791411, 797855	102	1381	12782	1.36112	1	0.522019	94.3692
GOTERM_CC_FAT	GO:0043228~non-membrane-bounded organelle	24	21.6216	0.304514	809686, 818836, 795829, 778543, 784511, 788771, 822806, 796443, 794878, 783768, 795726, 790215, 779157, 821689, 795963, 809326, 825519, 818676, 778146, 801728, 784611, 798323, 791411, 797855	102	2596	12782	1.15852	1	0.665061	99.1063
GOTERM_CC_FAT	GO:0043232~intracellular non-membrane-bounded organelle	24	21.6216	0.304514	809686, 818836, 795829, 778543, 784511, 788771, 822806, 796443, 794878, 783768, 795726, 790215, 779157, 821689, 795963, 809326, 825519, 818676, 778146, 801728, 784611, 798323, 791411, 797855	102	2596	12782	1.15852	1	0.665061	99.1063
Annotation Cluster 49	Enrichment Score: 0.5680450532552002
Category	Term	Count	%	PValue	Genes	List Total	Pop Hits	Pop Total	Fold Enrichment	Bonferroni	Benjamini	FDR
UP_SEQ_FEATURE	domain:EF-hand 3	3	2.7027	0.102099	825519, 798323, 823969	111	94	19113	5.4954	1	0.962716	80.4877
INTERPRO	IPR018248:EF hand	3	2.7027	0.206241	825519, 798323, 823969	109	130	16659	3.52696	1	0.992755	95.5705
INTERPRO	IPR002048:Calcium-binding EF-hand	3	2.7027	0.237218	825519, 798323, 823969	109	143	16659	3.20633	1	0.993885	97.4114
SMART	SM00054:EFh	3	2.7027	0.255483	825519, 798323, 823969	63	143	9079	3.02331	1	0.987302	95.4402
UP_SEQ_FEATURE	domain:EF-hand 2	3	2.7027	0.281813	825519, 798323, 823969	111	182	19113	2.83828	1	0.999828	99.3414
UP_SEQ_FEATURE	domain:EF-hand 1	3	2.7027	0.281813	825519, 798323, 823969	111	182	19113	2.83828	1	0.999828	99.3414
INTERPRO	IPR018249:EF-HAND 2	3	2.7027	0.407354	825519, 798323, 823969	109	215	16659	2.13258	1	0.999655	99.9141
INTERPRO	IPR018247:EF-HAND 1	3	2.7027	0.411877	825519, 798323, 823969	109	217	16659	2.11292	1	0.999557	99.9225
INTERPRO	IPR011992:EF-Hand type	3	2.7027	0.453972	825519, 798323, 823969	109	236	16659	1.94282	1	0.999779	99.9716
Annotation Cluster 50	Enrichment Score: 0.5649400041438479
Category	Term	Count	%	PValue	Genes	List Total	Pop Hits	Pop Total	Fold Enrichment	Bonferroni	Benjamini	FDR
GOTERM_BP_FAT	GO:0005996~monosaccharide metabolic process	4	3.6036	0.192134	809686, 783247, 799578, 826487	93	222	13528	2.62094	1	0.748095	97.0632
GOTERM_BP_FAT	GO:0006006~glucose metabolic process	3	2.7027	0.279256	783247, 799578, 826487	93	153	13528	2.8522	1	0.855425	99.5549
GOTERM_BP_FAT	GO:0019318~hexose metabolic process	3	2.7027	0.376333	783247, 799578, 826487	93	192	13528	2.27285	1	0.922518	99.9593
Annotation Cluster 51	Enrichment Score: 0.5520863214644962
Category	Term	Count	%	PValue	Genes	List Total	Pop Hits	Pop Total	Fold Enrichment	Bonferroni	Benjamini	FDR
SP_PIR_KEYWORDS	nucleotide-binding	16	14.4144	0.0568	818836, 818352, 804583, 826877, 783768, 794878, 799578, 794055, 813535, 785252, 795339, 806310, 812322, 782385, 790625, 820495	111	1686	19235	1.64449	1	0.30259	53.5425
SP_PIR_KEYWORDS	atp-binding	12	10.8108	0.136658	818836, 785252, 818352, 826877, 794878, 783768, 806310, 799578, 812322, 790625, 820495, 813535	111	1326	19235	1.56822	1	0.501107	85.4335
GOTERM_MF_FAT	GO:0016887~ATPase activity	5	4.5045	0.228504	818836, 794878, 783768, 812322, 813535	96	334	12983	2.02454	1	0.933556	97.0024
GOTERM_MF_FAT	GO:0017076~purine nucleotide binding	18	16.2162	0.232073	818836, 809292, 818352, 804583, 826877, 783768, 794878, 799578, 794055, 813535, 785252, 806310, 812322, 782385, 821489, 790625, 787982, 820495	96	1918	12983	1.26919	1	0.930998	97.1845
GOTERM_MF_FAT	GO:0030554~adenyl nucleotide binding	15	13.5135	0.260354	818836, 809292, 818352, 826877, 783768, 794878, 799578, 813535, 785252, 806310, 812322, 821489, 790625, 787982, 820495	96	1577	12983	1.28636	1	0.938689	98.3047
GOTERM_MF_FAT	GO:0001883~purine nucleoside binding	15	13.5135	0.279093	818836, 809292, 818352, 826877, 783768, 794878, 799578, 813535, 785252, 806310, 812322, 821489, 790625, 787982, 820495	96	1601	12983	1.26708	1	0.943051	98.8017
GOTERM_MF_FAT	GO:0001882~nucleoside binding	15	13.5135	0.287839	818836, 809292, 818352, 826877, 783768, 794878, 799578, 813535, 785252, 806310, 812322, 821489, 790625, 787982, 820495	96	1612	12983	1.25843	1	0.940397	98.984
UP_SEQ_FEATURE	nucleotide phosphate-binding region:ATP	8	7.20721	0.317527	818836, 785252, 818352, 826877, 794878, 783768, 806310, 799578	111	962	19113	1.43193	1	0.999842	99.6963
GOTERM_MF_FAT	GO:0000166~nucleotide binding	19	17.1171	0.374992	818836, 809292, 818352, 804583, 826877, 783768, 794878, 799578, 794055, 813535, 785252, 795339, 812322, 806310, 782385, 821489, 790625, 787982, 820495	96	2245	12983	1.14457	1	0.973368	99.826
GOTERM_MF_FAT	GO:0032553~ribonucleotide binding	15	13.5135	0.478286	818836, 818352, 804583, 826877, 783768, 794878, 799578, 794055, 813535, 785252, 806310, 812322, 782385, 790625, 820495	96	1836	12983	1.1049	1	0.988726	99.9849
GOTERM_MF_FAT	GO:0032555~purine ribonucleotide binding	15	13.5135	0.478286	818836, 818352, 804583, 826877, 783768, 794878, 799578, 794055, 813535, 785252, 806310, 812322, 782385, 790625, 820495	96	1836	12983	1.1049	1	0.988726	99.9849
GOTERM_MF_FAT	GO:0005524~ATP binding	12	10.8108	0.523227	818836, 785252, 818352, 826877, 794878, 783768, 806310, 799578, 812322, 790625, 820495, 813535	96	1477	12983	1.09876	1	0.992537	99.9955
GOTERM_MF_FAT	GO:0032559~adenyl ribonucleotide binding	12	10.8108	0.542056	818836, 785252, 818352, 826877, 794878, 783768, 806310, 799578, 812322, 790625, 820495, 813535	96	1497	12983	1.08408	1	0.992999	99.9974
Annotation Cluster 52	Enrichment Score: 0.519819360443613
Category	Term	Count	%	PValue	Genes	List Total	Pop Hits	Pop Total	Fold Enrichment	Bonferroni	Benjamini	FDR
GOTERM_BP_FAT	GO:0051241~negative regulation of multicellular organismal process	6	5.40541	0.00519049	794781, 801761, 811688, 791615, 817654, 804233	93	164	13528	5.32179	0.999446	0.080806	8.24486
GOTERM_BP_FAT	GO:0042325~regulation of phosphorylation	7	6.30631	0.0975997	794781, 814479, 784611, 791615, 826073, 817654, 804233	93	466	13528	2.18506	1	0.526407	81.6963
GOTERM_BP_FAT	GO:0007243~protein kinase cascade	3	2.7027	0.721329	794781, 791615, 817654	93	370	13528	1.17942	1	0.997704	100
GOTERM_BP_FAT	GO:0006468~protein amino acid phosphorylation	4	3.6036	0.838379	794781, 806310, 791615, 817654	93	667	13528	0.872338	1	0.999791	100
GOTERM_BP_FAT	GO:0006796~phosphate metabolic process	5	4.5045	0.905237	794781, 806310, 791615, 811080, 817654	93	973	13528	0.747494	1	0.999978	100
GOTERM_BP_FAT	GO:0006793~phosphorus metabolic process	5	4.5045	0.905237	794781, 806310, 791615, 811080, 817654	93	973	13528	0.747494	1	0.999978	100
GOTERM_BP_FAT	GO:0016310~phosphorylation	4	3.6036	0.915186	794781, 806310, 791615, 817654	93	800	13528	0.727312	1	0.999987	100
Annotation Cluster 53	Enrichment Score: 0.5143178794647311
Category	Term	Count	%	PValue	Genes	List Total	Pop Hits	Pop Total	Fold Enrichment	Bonferroni	Benjamini	FDR
GOTERM_BP_FAT	GO:0019953~sexual reproduction	6	5.40541	0.201121	795963, 794153, 784977, 784611, 791615, 784099	93	458	13528	1.90562	1	0.761105	97.5591
GOTERM_BP_FAT	GO:0003006~reproductive developmental process	4	3.6036	0.263704	795963, 794153, 801761, 791615	93	262	13528	2.2208	1	0.842086	99.3665
GOTERM_BP_FAT	GO:0007276~gamete generation	5	4.5045	0.281574	795963, 794153, 784977, 784611, 791615	93	395	13528	1.8413	1	0.857015	99.578
GOTERM_BP_FAT	GO:0032504~multicellular organism reproduction	5	4.5045	0.423761	795963, 794153, 784977, 784611, 791615	93	487	13528	1.49345	1	0.944338	99.989
GOTERM_BP_FAT	GO:0048609~reproductive process in a multicellular organism	5	4.5045	0.423761	795963, 794153, 784977, 784611, 791615	93	487	13528	1.49345	1	0.944338	99.989
Annotation Cluster 54	Enrichment Score: 0.505446887473792
Category	Term	Count	%	PValue	Genes	List Total	Pop Hits	Pop Total	Fold Enrichment	Bonferroni	Benjamini	FDR
GOTERM_MF_FAT	GO:0046983~protein dimerization activity	8	7.20721	0.101915	795963, 826111, 784977, 814479, 826877, 794878, 791615, 804233	96	542	12983	1.99616	1	0.780021	76.6192
GOTERM_BP_FAT	GO:0048534~hemopoietic or lymphoid organ development	3	2.7027	0.530659	784977, 794878, 791615	93	260	13528	1.67841	1	0.977286	99.9996
GOTERM_BP_FAT	GO:0002520~immune system development	3	2.7027	0.563124	784977, 794878, 791615	93	276	13528	1.58111	1	0.983902	99.9999
Annotation Cluster 55	Enrichment Score: 0.3390083639259612
Category	Term	Count	%	PValue	Genes	List Total	Pop Hits	Pop Total	Fold Enrichment	Bonferroni	Benjamini	FDR
GOTERM_BP_FAT	GO:0046907~intracellular transport	9	8.10811	0.078179	795963, 818836, 794781, 807973, 794878, 783768, 803417, 813535, 804233	93	657	13528	1.99264	1	0.455447	73.9719
GOTERM_BP_FAT	GO:0001775~cell activation	4	3.6036	0.310064	794781, 784977, 811688, 794878	93	287	13528	2.02735	1	0.882268	99.7839
GOTERM_BP_FAT	GO:0008104~protein localization	8	7.20721	0.393303	818836, 794781, 825565, 826111, 778146, 811688, 794878, 803417	93	882	13528	1.31939	1	0.929857	99.9742
GOTERM_BP_FAT	GO:0045184~establishment of protein localization	6	5.40541	0.605566	818836, 794781, 826111, 811688, 794878, 803417	93	769	13528	1.13495	1	0.989535	100
GOTERM_BP_FAT	GO:0006886~intracellular protein transport	3	2.7027	0.726865	818836, 794781, 803417	93	374	13528	1.16681	1	0.997827	100
GOTERM_BP_FAT	GO:0015031~protein transport	5	4.5045	0.768785	818836, 794781, 811688, 794878, 803417	93	762	13528	0.954477	1	0.998988	100
GOTERM_BP_FAT	GO:0034613~cellular protein localization	3	2.7027	0.773831	818836, 794781, 803417	93	411	13528	1.06177	1	0.999067	100
GOTERM_BP_FAT	GO:0070727~cellular macromolecule localization	3	2.7027	0.777317	818836, 794781, 803417	93	414	13528	1.05408	1	0.999113	100
Annotation Cluster 56	Enrichment Score: 0.31525859367296294
Category	Term	Count	%	PValue	Genes	List Total	Pop Hits	Pop Total	Fold Enrichment	Bonferroni	Benjamini	FDR
SP_PIR_KEYWORDS	membrane	44	39.6396	0.0863664	797658, 805447, 804583, 806556, 802187, 825863, 788771, 814479, 822806, 816597, 789359, 820867, 785252, 811688, 796685, 812322, 812401, 806127, 819944, 797855, 803569, 818276, 826111, 784977, 774025, 798274, 783247, 807686, 789056, 813535, 795963, 807973, 781129, 821192, 795339, 800485, 812705, 777548, 790389, 826073, 821489, 782974, 803417, 784099	111	6256	19235	1.21878	1	0.386451	69.3999
UP_SEQ_FEATURE	topological domain:Cytoplasmic	21	18.9189	0.481099	826111, 806556, 825863, 784977, 802187, 798274, 783247, 814479, 807686, 789359, 820867, 813535, 807973, 796685, 826073, 812322, 812401, 803417, 819944, 806127, 803569	111	3374	19113	1.07172	1	1	99.9952
SP_PIR_KEYWORDS	transmembrane	30	27.027	0.487751	797658, 805447, 806556, 825863, 802187, 814479, 822806, 789359, 820867, 816597, 796685, 812322, 812401, 819944, 806127, 803569, 826111, 784977, 774025, 798274, 783247, 807686, 813535, 807973, 821192, 800485, 795339, 790389, 826073, 803417	111	4973	19235	1.04537	1	0.920534	99.9845
UP_SEQ_FEATURE	transmembrane region	28	25.2252	0.644565	797658, 805447, 806556, 825863, 802187, 814479, 822806, 789359, 820867, 796685, 812322, 812401, 819944, 806127, 803569, 826111, 774025, 784977, 798274, 783247, 807686, 813535, 807973, 821192, 795339, 790389, 826073, 803417	111	4911	19113	0.981734	1	1	100
GOTERM_CC_FAT	GO:0016021~integral to membrane	32	28.8288	0.990287	797658, 805447, 806556, 825863, 802187, 814479, 822806, 794878, 789359, 820867, 816597, 778146, 796685, 812322, 812401, 806127, 819944, 803569, 826111, 784977, 774025, 798274, 783247, 807686, 813535, 807973, 821192, 800485, 795339, 790389, 826073, 803417	102	5297	12782	0.75704	1	0.999993	100
GOTERM_CC_FAT	GO:0031224~intrinsic to membrane	33	29.7297	0.992301	797658, 805447, 806556, 825863, 802187, 814479, 822806, 794878, 789359, 820867, 816597, 778146, 796685, 812322, 812401, 806127, 819944, 803569, 826111, 784977, 774025, 798274, 783247, 807686, 813535, 807973, 781129, 821192, 800485, 795339, 790389, 826073, 803417	102	5485	12782	0.753939	1	0.999995	100
Annotation Cluster 57	Enrichment Score: 0.269376146430636
Category	Term	Count	%	PValue	Genes	List Total	Pop Hits	Pop Total	Fold Enrichment	Bonferroni	Benjamini	FDR
SP_PIR_KEYWORDS	microtubule	3	2.7027	0.381605	795963, 784611, 797855	111	231	19235	2.2505	1	0.846344	99.8166
GOTERM_CC_FAT	GO:0015630~microtubule cytoskeleton	5	4.5045	0.635808	795963, 784611, 794878, 783768, 797855	102	549	12782	1.14129	1	0.941415	99.9998
GOTERM_CC_FAT	GO:0005874~microtubule	3	2.7027	0.641108	795963, 784611, 797855	102	274	12782	1.37205	1	0.941952	99.9998
Annotation Cluster 58	Enrichment Score: 0.2136913548872534
Category	Term	Count	%	PValue	Genes	List Total	Pop Hits	Pop Total	Fold Enrichment	Bonferroni	Benjamini	FDR
GOTERM_BP_FAT	GO:0009890~negative regulation of biosynthetic process	6	5.40541	0.35044	814479, 795726, 791615, 822682, 820867, 804233	93	573	13528	1.52317	1	0.908488	99.9203
GOTERM_BP_FAT	GO:0010558~negative regulation of macromolecule biosynthetic process	4	3.6036	0.72485	814479, 795726, 822682, 820867	93	547	13528	1.06371	1	0.997795	100
GOTERM_BP_FAT	GO:0031327~negative regulation of cellular biosynthetic process	3	2.7027	0.899631	814479, 795726, 822682	93	561	13528	0.777874	1	0.999974	100
Annotation Cluster 59	Enrichment Score: 0.16559924272371845
Category	Term	Count	%	PValue	Genes	List Total	Pop Hits	Pop Total	Fold Enrichment	Bonferroni	Benjamini	FDR
GOTERM_BP_FAT	GO:0065003~macromolecular complex assembly	5	4.5045	0.668773	818836, 823371, 799578, 816597, 804233	93	665	13528	1.0937	1	0.995133	100
GOTERM_BP_FAT	GO:0070271~protein complex biogenesis	4	3.6036	0.67295	818836, 823371, 799578, 816597	93	505	13528	1.15218	1	0.995338	100
GOTERM_BP_FAT	GO:0006461~protein complex assembly	4	3.6036	0.67295	818836, 823371, 799578, 816597	93	505	13528	1.15218	1	0.995338	100
GOTERM_BP_FAT	GO:0043933~macromolecular complex subunit organization	5	4.5045	0.718388	818836, 823371, 799578, 816597, 804233	93	710	13528	1.02438	1	0.997634	100
Annotation Cluster 60	Enrichment Score: 0.1491180680101152
Category	Term	Count	%	PValue	Genes	List Total	Pop Hits	Pop Total	Fold Enrichment	Bonferroni	Benjamini	FDR
GOTERM_BP_FAT	GO:0006351~transcription, DNA-dependent	3	2.7027	0.593978	788227, 826487, 791411	93	292	13528	1.49448	1	0.988477	100
GOTERM_BP_FAT	GO:0032774~RNA biosynthetic process	3	2.7027	0.601437	788227, 826487, 791411	93	296	13528	1.47428	1	0.989155	100
GOTERM_BP_FAT	GO:0006350~transcription	6	5.40541	0.999277	788227, 784511, 795726, 782974, 826487, 791411	93	2101	13528	0.415409	1	1	100
Annotation Cluster 61	Enrichment Score: 0.14756854046568044
Category	Term	Count	%	PValue	Genes	List Total	Pop Hits	Pop Total	Fold Enrichment	Bonferroni	Benjamini	FDR
SP_PIR_KEYWORDS	gtp-binding	3	2.7027	0.563858	804583, 794055, 782385	111	329	19235	1.58014	1	0.946705	99.9981
GOTERM_MF_FAT	GO:0005525~GTP binding	3	2.7027	0.760893	804583, 794055, 782385	96	372	12983	1.09064	1	0.999841	100
GOTERM_MF_FAT	GO:0032561~guanyl ribonucleotide binding	3	2.7027	0.773778	804583, 794055, 782385	96	382	12983	1.06209	1	0.999842	100
GOTERM_MF_FAT	GO:0019001~guanyl nucleotide binding	3	2.7027	0.773778	804583, 794055, 782385	96	382	12983	1.06209	1	0.999842	100
Annotation Cluster 62	Enrichment Score: 0.020289841413772342
Category	Term	Count	%	PValue	Genes	List Total	Pop Hits	Pop Total	Fold Enrichment	Bonferroni	Benjamini	FDR
GOTERM_MF_FAT	GO:0008134~transcription factor binding	4	3.6036	0.730429	792654, 784511, 795726, 791411	96	513	12983	1.0545	1	0.999716	100
GOTERM_BP_FAT	GO:0006357~regulation of transcription from RNA polymerase II promoter	3	2.7027	0.961804	784511, 814479, 789056	93	727	13528	0.600257	1	1	100
GOTERM_BP_FAT	GO:0045449~regulation of transcription	11	9.90991	0.98947	809326, 788227, 818676, 784511, 814479, 789056, 795726, 790215, 782974, 779157, 791411	93	2601	13528	0.615181	1	1	100
GOTERM_BP_FAT	GO:0006355~regulation of transcription, DNA-dependent	6	5.40541	0.99526	788227, 784511, 814479, 789056, 795726, 791411	93	1773	13528	0.492258	1	1	100
GOTERM_BP_FAT	GO:0051252~regulation of RNA metabolic process	6	5.40541	0.996197	788227, 784511, 814479, 789056, 795726, 791411	93	1813	13528	0.481398	1	1	100
GOTERM_BP_FAT	GO:0006350~transcription	6	5.40541	0.999277	788227, 784511, 795726, 782974, 826487, 791411	93	2101	13528	0.415409	1	1	100
SP_PIR_KEYWORDS	transcription regulation	4	3.6036	0.999544	788227, 784511, 795726, 782974	111	2026	19235	0.342129	1	1	100
SP_PIR_KEYWORDS	Transcription	4	3.6036	0.999643	788227, 784511, 795726, 782974	111	2071	19235	0.334695	1	1	100

## Sheet: Osteogenic
Annotation Cluster 1	Enrichment Score: 1.9326626269173388
Category	Term	Count	%	PValue	Genes	List Total	Pop Hits	Pop Total	Fold Enrichment	Bonferroni	Benjamini	FDR
GOTERM_MF_FAT	GO:0005198~structural molecule activity	9	20.4545	0.000411292	800376, 798707, 777984, 814248, 782130, 778958, 801872, 826696, 772335	39	634	12983	4.72567	0.0598412	0.0598412	0.490047
GOTERM_CC_FAT	GO:0022626~cytosolic ribosome	4	9.09091	0.001901	777984, 814248, 801872, 772335	40	81	12782	15.7802	0.239671	0.128032	2.23095
GOTERM_BP_FAT	GO:0006414~translational elongation	4	9.09091	0.00326617	777984, 814248, 801872, 772335	41	101	13528	13.0674	0.825702	0.825702	4.64342
SP_PIR_KEYWORDS	ribonucleoprotein	5	11.3636	0.00342745	777984, 814248, 801872, 782425, 772335	44	279	19235	7.83439	0.438307	0.250538	4.09407
GOTERM_CC_FAT	GO:0022627~cytosolic small ribosomal subunit	3	6.81818	0.00657665	814248, 801872, 772335	40	40	12782	23.9662	0.613323	0.211436	7.52564
GOTERM_CC_FAT	GO:0033279~ribosomal subunit	4	9.09091	0.0068922	777984, 814248, 801872, 772335	40	128	12782	9.98594	0.630614	0.1806	7.87333
KEGG_PATHWAY	hsa03010:Ribosome	4	9.09091	0.00755203	777984, 814248, 801872, 772335	25	87	5085	9.35172	0.289034	0.289034	6.88095
SP_PIR_KEYWORDS	ribosomal protein	4	9.09091	0.00851115	777984, 814248, 801872, 772335	44	188	19235	9.30126	0.762121	0.301624	9.88383
GOTERM_CC_FAT	GO:0044445~cytosolic part	4	9.09091	0.0110179	777984, 814248, 801872, 772335	40	152	12782	8.40921	0.797169	0.233482	12.3104
SP_PIR_KEYWORDS	ribosome	3	6.81818	0.0116023	814248, 801872, 772335	44	73	19235	17.9654	0.859224	0.244279	13.2456
GOTERM_MF_FAT	GO:0003735~structural constituent of ribosome	4	9.09091	0.012886	777984, 814248, 801872, 772335	39	168	12983	7.92613	0.857079	0.621951	14.3482
GOTERM_CC_FAT	GO:0015935~small ribosomal subunit	3	6.81818	0.0157576	814248, 801872, 772335	40	63	12782	15.2167	0.898446	0.278728	17.1659
GOTERM_CC_FAT	GO:0005829~cytosol	10	22.7273	0.0165929	802428, 798707, 777984, 792895, 814248, 792736, 801872, 794852, 772335, 818087	40	1330	12782	2.40263	0.910133	0.260054	17.9956
GOTERM_CC_FAT	GO:0005840~ribosome	4	9.09091	0.0275085	777984, 814248, 801872, 772335	40	215	12782	5.94512	0.981988	0.330801	28.1613
SP_PIR_KEYWORDS	protein biosynthesis	3	6.81818	0.0660957	814248, 801872, 772335	44	188	19235	6.97594	0.99999	0.616087	56.5071
GOTERM_CC_FAT	GO:0030529~ribonucleoprotein complex	5	11.3636	0.0706386	777984, 814248, 801872, 782425, 772335	40	515	12782	3.10243	0.999974	0.426051	58.0476
GOTERM_BP_FAT	GO:0006412~translation	4	9.09091	0.0738531	777984, 814248, 801872, 772335	41	331	13528	3.98733	1	0.997128	67.2101
GOTERM_MF_FAT	GO:0003723~RNA binding	5	11.3636	0.156419	777984, 814248, 794852, 782425, 772335	39	718	12983	2.31823	1	0.973878	86.8831
Annotation Cluster 2	Enrichment Score: 1.1626206003301784
Category	Term	Count	%	PValue	Genes	List Total	Pop Hits	Pop Total	Fold Enrichment	Bonferroni	Benjamini	FDR
GOTERM_CC_FAT	GO:0005739~mitochondrion	10	22.7273	0.0046115	802076, 779088, 798707, 797565, 822165, 787596, 826221, 823216, 818567, 803359	40	1087	12782	2.93974	0.486031	0.198976	5.33316
SP_PIR_KEYWORDS	mitochondrion	7	15.9091	0.0100008	802076, 779088, 789549, 822165, 787596, 818567, 803359	44	832	19235	3.67802	0.81522	0.286603	11.5185
GOTERM_CC_FAT	GO:0044429~mitochondrial part	6	13.6364	0.0334929	802076, 779088, 822165, 787596, 818567, 803359	40	595	12782	3.22235	0.992595	0.359793	33.2315
GOTERM_CC_FAT	GO:0005743~mitochondrial inner membrane	4	9.09091	0.0659973	802076, 779088, 818567, 803359	40	306	12782	4.17712	0.999946	0.43917	55.495
SP_PIR_KEYWORDS	mitochondrion inner membrane	3	6.81818	0.0691877	802076, 779088, 803359	44	193	19235	6.79522	0.999994	0.604084	58.2283
GOTERM_CC_FAT	GO:0019866~organelle inner membrane	4	9.09091	0.0782988	802076, 779088, 818567, 803359	40	329	12782	3.88511	0.999992	0.444033	61.9692
UP_SEQ_FEATURE	transit peptide:Mitochondrion	4	9.09091	0.087348	822165, 787596, 818567, 803359	44	467	19113	3.72065	1	0.999877	68.1068
SP_PIR_KEYWORDS	transit peptide	4	9.09091	0.0899373	822165, 787596, 818567, 803359	44	476	19235	3.67361	1	0.651984	68.255
GOTERM_CC_FAT	GO:0031966~mitochondrial membrane	4	9.09091	0.11795	802076, 779088, 818567, 803359	40	394	12782	3.24416	1	0.529068	77.4215
GOTERM_BP_FAT	GO:0055114~oxidation reduction	5	11.3636	0.118556	802076, 822165, 787596, 818567, 803359	41	639	13528	2.58178	1	0.99944	84.0234
GOTERM_CC_FAT	GO:0031967~organelle envelope	5	11.3636	0.118812	802076, 779088, 822474, 818567, 803359	40	620	12782	2.57702	1	0.51739	77.6815
GOTERM_CC_FAT	GO:0031975~envelope	5	11.3636	0.119845	802076, 779088, 822474, 818567, 803359	40	622	12782	2.56873	1	0.506891	77.9899
SP_PIR_KEYWORDS	oxidoreductase	4	9.09091	0.130246	822165, 787596, 818567, 803359	44	562	19235	3.11145	1	0.748177	81.7137
GOTERM_CC_FAT	GO:0005740~mitochondrial envelope	4	9.09091	0.134901	802076, 779088, 818567, 803359	40	419	12782	3.0506	1	0.525389	82.0622
GOTERM_CC_FAT	GO:0031090~organelle membrane	6	13.6364	0.239595	802076, 779088, 798707, 822474, 818567, 803359	40	1096	12782	1.74936	1	0.697362	96.1139
Annotation Cluster 3	Enrichment Score: 1.1561269620203851
Category	Term	Count	%	PValue	Genes	List Total	Pop Hits	Pop Total	Fold Enrichment	Bonferroni	Benjamini	FDR
SP_PIR_KEYWORDS	lysosome	4	9.09091	0.00448115	797565, 826221, 823216, 789359	44	149	19235	11.7358	0.529766	0.222373	5.32144
KEGG_PATHWAY	hsa04142:Lysosome	4	9.09091	0.0168958	797565, 826221, 823216, 789359	25	117	5085	6.95385	0.535506	0.318462	14.807
GOTERM_CC_FAT	GO:0000323~lytic vacuole	4	9.09091	0.0262113	797565, 826221, 823216, 789359	40	211	12782	6.05782	0.978177	0.346214	27.0168
GOTERM_CC_FAT	GO:0005764~lysosome	4	9.09091	0.0262113	797565, 826221, 823216, 789359	40	211	12782	6.05782	0.978177	0.346214	27.0168
GOTERM_CC_FAT	GO:0005773~vacuole	4	9.09091	0.0411124	797565, 826221, 823216, 789359	40	252	12782	5.07222	0.997631	0.371881	39.2125
GOTERM_BP_FAT	GO:0006869~lipid transport	3	6.81818	0.0683128	798707, 797565, 823216	41	145	13528	6.82658	1	0.999478	64.241
GOTERM_MF_FAT	GO:0008047~enzyme activator activity	4	9.09091	0.0740515	798707, 797565, 826221, 823216	39	335	12983	3.97489	0.99999	0.944152	60.0983
GOTERM_BP_FAT	GO:0010876~lipid localization	3	6.81818	0.0783973	798707, 797565, 823216	41	157	13528	6.3048	1	0.995702	69.4723
SP_PIR_KEYWORDS	disease mutation	5	11.3636	0.480796	798707, 797565, 782130, 826221, 823216	44	1591	19235	1.37385	1	0.983066	99.9658
UP_SEQ_FEATURE	glycosylation site:N-linked (GlcNAc...)	10	22.7273	0.602347	811418, 800376, 797565, 822474, 826696, 826221, 823216, 789359, 808970, 818087	44	4129	19113	1.05204	1	1	99.999
UP_SEQ_FEATURE	disulfide bond	6	13.6364	0.780444	800376, 797565, 826221, 823216, 818087, 803359	44	2819	19113	0.924554	1	1	100
Annotation Cluster 4	Enrichment Score: 1.1097067873017517
Category	Term	Count	%	PValue	Genes	List Total	Pop Hits	Pop Total	Fold Enrichment	Bonferroni	Benjamini	FDR
GOTERM_BP_FAT	GO:0007010~cytoskeleton organization	5	11.3636	0.0390226	825257, 793194, 798707, 822573, 822474	41	436	13528	3.78384	1	0.999976	43.9261
GOTERM_BP_FAT	GO:0000226~microtubule cytoskeleton organization	3	6.81818	0.0699612	793194, 798707, 822474	41	147	13528	6.7337	1	0.998427	65.1496
GOTERM_BP_FAT	GO:0007017~microtubule-based process	3	6.81818	0.171675	793194, 798707, 822474	41	253	13528	3.91247	1	0.999771	93.5261
Annotation Cluster 5	Enrichment Score: 1.0970968287777456
Category	Term	Count	%	PValue	Genes	List Total	Pop Hits	Pop Total	Fold Enrichment	Bonferroni	Benjamini	FDR
GOTERM_CC_FAT	GO:0005938~cell cortex	5	11.3636	0.000984843	825257, 798707, 822573, 797565, 778958	40	146	12782	10.9435	0.132281	0.132281	1.16153
GOTERM_CC_FAT	GO:0044459~plasma membrane part	7	15.9091	0.685319	822836, 798707, 822573, 797565, 778958, 789359, 808970	40	2203	12782	1.01537	1	0.984428	99.9999
GOTERM_CC_FAT	GO:0005886~plasma membrane	11	25	0.757618	822836, 811418, 825257, 798707, 822573, 816398, 797565, 778958, 794683, 789359, 808970	40	3777	12782	0.930646	1	0.990325	100
Annotation Cluster 6	Enrichment Score: 0.9979598016579886
Category	Term	Count	%	PValue	Genes	List Total	Pop Hits	Pop Total	Fold Enrichment	Bonferroni	Benjamini	FDR
GOTERM_CC_FAT	GO:0005925~focal adhesion	3	6.81818	0.0385882	822836, 798707, 822573	40	102	12782	9.39853	0.996541	0.376389	37.2877
GOTERM_CC_FAT	GO:0005924~cell-substrate adherens junction	3	6.81818	0.0413749	822836, 798707, 822573	40	106	12782	9.04387	0.997723	0.352492	39.4095
GOTERM_CC_FAT	GO:0030055~cell-substrate junction	3	6.81818	0.0456931	822836, 798707, 822573	40	112	12782	8.55937	0.998811	0.343564	42.5678
GOTERM_CC_FAT	GO:0005912~adherens junction	3	6.81818	0.080909	822836, 798707, 822573	40	155	12782	6.18484	0.999995	0.439283	63.2268
GOTERM_CC_FAT	GO:0070161~anchoring junction	3	6.81818	0.0965727	822836, 798707, 822573	40	172	12782	5.57355	1	0.470516	70.0075
GOTERM_CC_FAT	GO:0016323~basolateral plasma membrane	3	6.81818	0.127091	822836, 798707, 822573	40	203	12782	4.72241	1	0.515642	80.0451
GOTERM_CC_FAT	GO:0030054~cell junction	4	9.09091	0.209132	822836, 798707, 822573, 778958	40	518	12782	2.46757	1	0.663738	93.8086
GOTERM_CC_FAT	GO:0044459~plasma membrane part	7	15.9091	0.685319	822836, 798707, 822573, 797565, 778958, 789359, 808970	40	2203	12782	1.01537	1	0.984428	99.9999
Annotation Cluster 7	Enrichment Score: 0.9619343998597268
Category	Term	Count	%	PValue	Genes	List Total	Pop Hits	Pop Total	Fold Enrichment	Bonferroni	Benjamini	FDR
SMART	SM00132:LIM	3	6.81818	0.00711442	822836, 822573, 812499	17	73	9079	21.9476	0.139238	0.139238	5.36372
SP_PIR_KEYWORDS	LIM domain	3	6.81818	0.0110019	822836, 822573, 812499	44	71	19235	18.4715	0.844104	0.266378	12.6018
INTERPRO	IPR001781:Zinc finger, LIM-type	3	6.81818	0.0152307	822836, 822573, 812499	44	73	16659	15.5595	0.848594	0.848594	16.2196
SP_PIR_KEYWORDS	metal-binding	10	22.7273	0.210825	822836, 811418, 822573, 798453, 822165, 799395, 794852, 808970, 812499, 803359	44	2972	19235	1.47093	1	0.849552	94.402
GOTERM_MF_FAT	GO:0046914~transition metal ion binding	7	15.9091	0.854456	822836, 811418, 822573, 798453, 794852, 812499, 803359	39	2785	12983	0.836726	1	1	100
SP_PIR_KEYWORDS	zinc	4	9.09091	0.881566	822836, 811418, 822573, 812499	44	2189	19235	0.798829	1	0.999964	100
GOTERM_MF_FAT	GO:0008270~zinc ion binding	4	9.09091	0.975582	822836, 811418, 822573, 812499	39	2311	12983	0.576196	1	1	100
Annotation Cluster 8	Enrichment Score: 0.7521193504992746
Category	Term	Count	%	PValue	Genes	List Total	Pop Hits	Pop Total	Fold Enrichment	Bonferroni	Benjamini	FDR
GOTERM_BP_FAT	GO:0007155~cell adhesion	5	11.3636	0.150693	822836, 825257, 816398, 826696, 789359	41	700	13528	2.35679	1	0.999837	90.6877
GOTERM_BP_FAT	GO:0022610~biological adhesion	5	11.3636	0.151247	822836, 825257, 816398, 826696, 789359	41	701	13528	2.35343	1	0.999651	90.7755
SP_PIR_KEYWORDS	cell adhesion	3	6.81818	0.243144	822836, 816398, 826696	44	422	19235	3.10777	1	0.880848	96.6354
Annotation Cluster 9	Enrichment Score: 0.6987623615972909
Category	Term	Count	%	PValue	Genes	List Total	Pop Hits	Pop Total	Fold Enrichment	Bonferroni	Benjamini	FDR
GOTERM_CC_FAT	GO:0000267~cell fraction	8	18.1818	0.0431802	811418, 825257, 793194, 798707, 792895, 816398, 792736, 789359	40	1083	12782	2.36048	0.998264	0.34541	40.7487
SP_PIR_KEYWORDS	lipoprotein	4	9.09091	0.172504	811418, 825257, 798707, 794683	44	642	19235	2.72373	1	0.796186	90.0284
GOTERM_CC_FAT	GO:0005624~membrane fraction	5	11.3636	0.23165	811418, 825257, 793194, 798707, 789359	40	809	12782	1.97497	1	0.694497	95.6042
GOTERM_CC_FAT	GO:0005626~insoluble fraction	5	11.3636	0.251755	811418, 825257, 793194, 798707, 789359	40	839	12782	1.90435	1	0.707222	96.79
SP_PIR_KEYWORDS	cell membrane	5	11.3636	0.738405	811418, 825257, 798707, 789549, 778958	44	2194	19235	0.99626	1	0.999124	100
Annotation Cluster 10	Enrichment Score: 0.523439124601033
Category	Term	Count	%	PValue	Genes	List Total	Pop Hits	Pop Total	Fold Enrichment	Bonferroni	Benjamini	FDR
SP_PIR_KEYWORDS	actin-binding	3	6.81818	0.105323	822573, 782130, 778958	44	247	19235	5.30962	1	0.689188	74.2061
SP_PIR_KEYWORDS	cytoskeleton	4	9.09091	0.169202	822836, 822573, 782130, 778958	44	636	19235	2.74943	1	0.805835	89.533
GOTERM_MF_FAT	GO:0008092~cytoskeletal protein binding	4	9.09091	0.182082	822573, 782130, 822474, 778958	39	504	12983	2.64204	1	0.976916	90.93
GOTERM_CC_FAT	GO:0015629~actin cytoskeleton	3	6.81818	0.197869	822836, 822573, 782130	40	269	12782	3.56375	1	0.652963	92.6784
GOTERM_MF_FAT	GO:0003779~actin binding	3	6.81818	0.247112	822573, 782130, 778958	39	326	12983	3.06347	1	0.991179	96.6275
SP_PIR_KEYWORDS	cytoplasm	8	18.1818	0.634304	822836, 802428, 822573, 814248, 782130, 778958, 794852, 804403	44	3332	19235	1.0496	1	0.997055	99.9995
GOTERM_CC_FAT	GO:0044430~cytoskeletal part	3	6.81818	0.798201	822836, 822573, 782130	40	952	12782	1.00699	1	0.994033	100
GOTERM_CC_FAT	GO:0005856~cytoskeleton	4	9.09091	0.808372	822836, 822573, 782130, 778958	40	1381	12782	0.925561	1	0.994327	100
Annotation Cluster 11	Enrichment Score: 0.4813621077549641
Category	Term	Count	%	PValue	Genes	List Total	Pop Hits	Pop Total	Fold Enrichment	Bonferroni	Benjamini	FDR
GOTERM_BP_FAT	GO:0009725~response to hormone stimulus	3	6.81818	0.295975	798707, 804403, 803359	41	367	13528	2.69715	1	0.999992	99.3906
GOTERM_BP_FAT	GO:0009719~response to endogenous stimulus	3	6.81818	0.337636	798707, 804403, 803359	41	405	13528	2.44408	1	0.999998	99.7489
GOTERM_BP_FAT	GO:0010033~response to organic substance	4	9.09091	0.359924	798707, 804403, 818087, 803359	41	721	13528	1.83052	1	0.999998	99.8473
Annotation Cluster 12	Enrichment Score: 0.46543364804794857
Category	Term	Count	%	PValue	Genes	List Total	Pop Hits	Pop Total	Fold Enrichment	Bonferroni	Benjamini	FDR
GOTERM_MF_FAT	GO:0005506~iron ion binding	4	9.09091	0.0606419	811418, 798453, 794852, 803359	39	308	12983	4.32334	0.999916	0.956192	52.6239
SP_PIR_KEYWORDS	iron	3	6.81818	0.133201	798453, 794852, 803359	44	285	19235	4.60167	1	0.736626	82.4559
SP_PIR_KEYWORDS	metal-binding	10	22.7273	0.210825	822836, 811418, 822573, 798453, 822165, 799395, 794852, 808970, 812499, 803359	44	2972	19235	1.47093	1	0.849552	94.402
GOTERM_MF_FAT	GO:0046872~metal ion binding	12	27.2727	0.708242	822836, 811418, 822573, 798453, 822165, 778958, 799395, 794852, 808970, 812499, 818567, 803359	39	4140	12983	0.96492	1	1	100
GOTERM_MF_FAT	GO:0043169~cation binding	12	27.2727	0.721659	822836, 811418, 822573, 798453, 822165, 778958, 799395, 794852, 808970, 812499, 818567, 803359	39	4179	12983	0.955915	1	1	100
GOTERM_MF_FAT	GO:0043167~ion binding	12	27.2727	0.742266	822836, 811418, 822573, 798453, 822165, 778958, 799395, 794852, 808970, 812499, 818567, 803359	39	4241	12983	0.94194	1	1	100
GOTERM_MF_FAT	GO:0046914~transition metal ion binding	7	15.9091	0.854456	822836, 811418, 822573, 798453, 794852, 812499, 803359	39	2785	12983	0.836726	1	1	100
Annotation Cluster 13	Enrichment Score: 0.43884459664622855
Category	Term	Count	%	PValue	Genes	List Total	Pop Hits	Pop Total	Fold Enrichment	Bonferroni	Benjamini	FDR
SP_PIR_KEYWORDS	lipoprotein	4	9.09091	0.172504	811418, 825257, 798707, 794683	44	642	19235	2.72373	1	0.796186	90.0284
GOTERM_CC_FAT	GO:0005794~Golgi apparatus	5	11.3636	0.274323	825257, 798707, 794852, 794683, 823216	40	872	12782	1.83228	1	0.722684	97.7675
SP_PIR_KEYWORDS	golgi apparatus	3	6.81818	0.380126	825257, 798707, 794683	44	588	19235	2.2304	1	0.959795	99.7041
GOTERM_BP_FAT	GO:0008104~protein localization	4	9.09091	0.488898	825257, 798707, 794683, 826221	41	882	13528	1.49638	1	1	99.9942
GOTERM_BP_FAT	GO:0016192~vesicle-mediated transport	3	6.81818	0.512784	825257, 798707, 794683	41	576	13528	1.7185	1	1	99.9971
GOTERM_BP_FAT	GO:0007242~intracellular signaling cascade	5	11.3636	0.51617	825257, 798707, 784692, 794683, 804403	41	1256	13528	1.3135	1	1	99.9974
Annotation Cluster 14	Enrichment Score: 0.42516889817819153
Category	Term	Count	%	PValue	Genes	List Total	Pop Hits	Pop Total	Fold Enrichment	Bonferroni	Benjamini	FDR
GOTERM_CC_FAT	GO:0005694~chromosome	4	9.09091	0.164416	822474, 778958, 797864, 784692	40	460	12782	2.7787	1	0.590135	88.1146
GOTERM_CC_FAT	GO:0044427~chromosomal part	3	6.81818	0.330371	822474, 797864, 784692	40	386	12782	2.48355	1	0.790026	99.1393
SP_PIR_KEYWORDS	nucleus	6	13.6364	0.97622	822836, 822474, 797864, 784692, 782425, 795705	44	4283	19235	0.612411	1	1	100
Annotation Cluster 15	Enrichment Score: 0.3977829955447814
Category	Term	Count	%	PValue	Genes	List Total	Pop Hits	Pop Total	Fold Enrichment	Bonferroni	Benjamini	FDR
GOTERM_BP_FAT	GO:0034622~cellular macromolecular complex assembly	3	6.81818	0.241955	802076, 798707, 784692	41	318	13528	3.11275	1	0.999989	98.2154
GOTERM_BP_FAT	GO:0034621~cellular macromolecular complex subunit organization	3	6.81818	0.284951	802076, 798707, 784692	41	357	13528	2.7727	1	0.999993	99.2362
GOTERM_BP_FAT	GO:0065003~macromolecular complex assembly	3	6.81818	0.591881	802076, 798707, 784692	41	665	13528	1.4885	1	1	99.9998
GOTERM_BP_FAT	GO:0043933~macromolecular complex subunit organization	3	6.81818	0.628246	802076, 798707, 784692	41	710	13528	1.39416	1	1	99.9999
Annotation Cluster 16	Enrichment Score: 0.28246232261427506
Category	Term	Count	%	PValue	Genes	List Total	Pop Hits	Pop Total	Fold Enrichment	Bonferroni	Benjamini	FDR
SP_PIR_KEYWORDS	lipoprotein	4	9.09091	0.172504	811418, 825257, 798707, 794683	44	642	19235	2.72373	1	0.796186	90.0284
SP_PIR_KEYWORDS	nucleotide-binding	3	6.81818	0.900921	811418, 825257, 794683	44	1686	19235	0.777863	1	0.999972	100
GOTERM_MF_FAT	GO:0000166~nucleotide binding	5	11.3636	0.914382	811418, 825257, 822165, 794683, 782425	39	2245	12983	0.74142	1	1	100
Annotation Cluster 17	Enrichment Score: 0.2571285438301651
Category	Term	Count	%	PValue	Genes	List Total	Pop Hits	Pop Total	Fold Enrichment	Bonferroni	Benjamini	FDR
SP_PIR_KEYWORDS	disulfide bond	9	20.4545	0.326303	811418, 800376, 797565, 826696, 826221, 823216, 808970, 818087, 803359	44	2924	19235	1.34556	1	0.944147	99.1844
SP_PIR_KEYWORDS	signal	9	20.4545	0.444189	811418, 800376, 816398, 797565, 826696, 826221, 823216, 808970, 818087	44	3250	19235	1.21059	1	0.977518	99.9216
UP_SEQ_FEATURE	signal peptide	9	20.4545	0.451755	811418, 800376, 816398, 797565, 826696, 826221, 823216, 808970, 818087	44	3250	19113	1.20292	1	1	99.9455
SP_PIR_KEYWORDS	glycoprotein	11	25	0.508745	811418, 800376, 792895, 797565, 822474, 826696, 826221, 823216, 789359, 808970, 818087	44	4318	19235	1.11365	1	0.985945	99.9826
UP_SEQ_FEATURE	glycosylation site:N-linked (GlcNAc...)	10	22.7273	0.602347	811418, 800376, 797565, 822474, 826696, 826221, 823216, 789359, 808970, 818087	44	4129	19113	1.05204	1	1	99.999
SP_PIR_KEYWORDS	Secreted	4	9.09091	0.740755	800376, 816398, 826696, 818087	44	1689	19235	1.03531	1	0.998964	100
GOTERM_CC_FAT	GO:0005576~extracellular region	6	13.6364	0.755992	793194, 800376, 816398, 826696, 823216, 818087	40	2010	12782	0.953881	1	0.991118	100
UP_SEQ_FEATURE	disulfide bond	6	13.6364	0.780444	800376, 797565, 826221, 823216, 818087, 803359	44	2819	19113	0.924554	1	1	100
Annotation Cluster 18	Enrichment Score: 0.21967571012183665
Category	Term	Count	%	PValue	Genes	List Total	Pop Hits	Pop Total	Fold Enrichment	Bonferroni	Benjamini	FDR
GOTERM_BP_FAT	GO:0008104~protein localization	4	9.09091	0.488898	825257, 798707, 794683, 826221	41	882	13528	1.49638	1	1	99.9942
GOTERM_BP_FAT	GO:0015031~protein transport	3	6.81818	0.667202	825257, 794683, 826221	41	762	13528	1.29902	1	1	100
GOTERM_BP_FAT	GO:0045184~establishment of protein localization	3	6.81818	0.672198	825257, 794683, 826221	41	769	13528	1.2872	1	1	100
Annotation Cluster 19	Enrichment Score: 0.18406334924257256
Category	Term	Count	%	PValue	Genes	List Total	Pop Hits	Pop Total	Fold Enrichment	Bonferroni	Benjamini	FDR
GOTERM_BP_FAT	GO:0006811~ion transport	4	9.09091	0.398371	798707, 822573, 789549, 808970	41	768	13528	1.7185	1	0.999999	99.9379
GOTERM_BP_FAT	GO:0006812~cation transport	3	6.81818	0.490852	798707, 789549, 808970	41	553	13528	1.78997	1	1	99.9945
UP_SEQ_FEATURE	transmembrane region	8	18.1818	0.950189	779088, 798707, 798453, 789549, 822474, 799395, 789359, 808970	44	4911	19113	0.707614	1	1	100
UP_SEQ_FEATURE	topological domain:Cytoplasmic	4	9.09091	0.987865	798707, 789549, 789359, 808970	44	3374	19113	0.514981	1	1	100
Annotation Cluster 20	Enrichment Score: 0.14854321177232768
Category	Term	Count	%	PValue	Genes	List Total	Pop Hits	Pop Total	Fold Enrichment	Bonferroni	Benjamini	FDR
GOTERM_CC_FAT	GO:0044459~plasma membrane part	7	15.9091	0.685319	822836, 798707, 822573, 797565, 778958, 789359, 808970	40	2203	12782	1.01537	1	0.984428	99.9999
GOTERM_CC_FAT	GO:0005887~integral to plasma membrane	4	9.09091	0.71588	822836, 798707, 797565, 789359	40	1188	12782	1.07593	1	0.987961	100
GOTERM_CC_FAT	GO:0031226~intrinsic to plasma membrane	4	9.09091	0.730529	822836, 798707, 797565, 789359	40	1215	12782	1.05202	1	0.988845	100
Annotation Cluster 21	Enrichment Score: 0.08353270111309594
Category	Term	Count	%	PValue	Genes	List Total	Pop Hits	Pop Total	Fold Enrichment	Bonferroni	Benjamini	FDR
GOTERM_CC_FAT	GO:0070013~intracellular organelle lumen	5	11.3636	0.811395	798453, 822165, 787596, 784692, 823216	40	1779	12782	0.898117	1	0.993969	100
GOTERM_CC_FAT	GO:0043233~organelle lumen	5	11.3636	0.825934	798453, 822165, 787596, 784692, 823216	40	1820	12782	0.877885	1	0.994726	100
GOTERM_CC_FAT	GO:0031974~membrane-enclosed lumen	5	11.3636	0.837962	798453, 822165, 787596, 784692, 823216	40	1856	12782	0.860857	1	0.995244	100
Annotation Cluster 22	Enrichment Score: 0.05726739327491107
Category	Term	Count	%	PValue	Genes	List Total	Pop Hits	Pop Total	Fold Enrichment	Bonferroni	Benjamini	FDR
SP_PIR_KEYWORDS	membrane	14	31.8182	0.680289	825257, 802076, 798707, 789549, 778958, 799395, 789359, 808970, 803359, 811418, 793194, 779088, 798453, 822474	44	6256	19235	0.978297	1	0.998315	99.9999
SP_PIR_KEYWORDS	transmembrane	9	20.4545	0.900199	779088, 798707, 798453, 789549, 822474, 799395, 789359, 808970, 803359	44	4973	19235	0.791159	1	0.999979	100
GOTERM_CC_FAT	GO:0031224~intrinsic to membrane	14	31.8182	0.916538	798707, 789549, 799395, 789359, 808970, 803359, 811418, 822836, 793194, 779088, 798453, 797565, 822474, 823216	40	5485	12782	0.815624	1	0.999217	100
UP_SEQ_FEATURE	transmembrane region	8	18.1818	0.950189	779088, 798707, 798453, 789549, 822474, 799395, 789359, 808970	44	4911	19113	0.707614	1	1	100
GOTERM_CC_FAT	GO:0016021~integral to membrane	12	27.2727	0.969774	822836, 779088, 798707, 798453, 797565, 789549, 822474, 799395, 823216, 789359, 808970, 803359	40	5297	12782	0.723919	1	0.999949	100

## Sheet: Tenogenic
Annotation Cluster 1	Enrichment Score: 7.084307564909952
Category	Term	Count	%	PValue	Genes	List Total	Pop Hits	Pop Total	Fold Enrichment	Bonferroni	Benjamini	FDR
GOTERM_CC_FAT	GO:0042470~melanosome	12	8.10811	1.86906e-09	812139, 784769, 815675, 823976, 783500, 784977, 785761, 797325, 783505, 791781, 791999, 804644	134	89	12782	12.8613	5.02776e-07	2.51388e-07	2.45605e-06
GOTERM_CC_FAT	GO:0048770~pigment granule	12	8.10811	1.86906e-09	812139, 784769, 815675, 823976, 783500, 784977, 785761, 797325, 783505, 791781, 791999, 804644	134	89	12782	12.8613	5.02776e-07	2.51388e-07	2.45605e-06
GOTERM_CC_FAT	GO:0031988~membrane-bounded vesicle	23	15.5405	8.75508e-08	788455, 813997, 815675, 823976, 784977, 785761, 808953, 797325, 795388, 791999, 812139, 805919, 784769, 783500, 786096, 783505, 824963, 826073, 817654, 792407, 791781, 811696, 804644	134	568	12782	3.86254	2.35509e-05	5.88777e-06	0.000115047
GOTERM_CC_FAT	GO:0031982~vesicle	24	16.2162	3.7467e-07	788455, 813997, 815675, 823976, 784977, 785761, 808953, 797325, 795388, 791999, 812139, 805919, 784769, 783500, 786096, 783505, 824963, 826073, 783835, 817654, 792407, 791781, 811696, 804644	134	670	12782	3.41689	0.000100781	1.67976e-05	0.000492337
GOTERM_CC_FAT	GO:0016023~cytoplasmic membrane-bounded vesicle	21	14.1892	9.79508e-07	813997, 815675, 823976, 784977, 785761, 808953, 797325, 795388, 791999, 812139, 805919, 784769, 783500, 786096, 783505, 824963, 826073, 817654, 791781, 811696, 804644	134	550	12782	3.64209	0.000263453	3.29354e-05	0.00128712
GOTERM_CC_FAT	GO:0031410~cytoplasmic vesicle	22	14.8649	2.77967e-06	813997, 815675, 823976, 784977, 785761, 808953, 797325, 795388, 791999, 812139, 805919, 784769, 783500, 786096, 783505, 824963, 826073, 783835, 817654, 791781, 811696, 804644	134	642	12782	3.26875	0.000747452	7.47703e-05	0.00365258
Annotation Cluster 2	Enrichment Score: 5.941331730759482
Category	Term	Count	%	PValue	Genes	List Total	Pop Hits	Pop Total	Fold Enrichment	Bonferroni	Benjamini	FDR
SP_PIR_KEYWORDS	actin-binding	19	12.8378	6.02906e-13	802976, 822573, 808953, 782130, 815507, 794878, 801440, 825820, 822491, 815528, 815272, 786096, 794115, 794587, 811889, 805574, 801728, 772395, 820625	148	247	19235	9.9974	1.82664e-10	4.56659e-11	8.0681e-10
GOTERM_MF_FAT	GO:0003779~actin binding	23	15.5405	4.01075e-12	799778, 802976, 822573, 808953, 783885, 782130, 815507, 794878, 801440, 825820, 822491, 789529, 815528, 815272, 794115, 786096, 794587, 811889, 805574, 801728, 772395, 792407, 820625	139	326	12983	6.58977	1.48399e-09	1.48399e-09	5.53078e-09
GOTERM_MF_FAT	GO:0008092~cytoskeletal protein binding	25	16.8919	5.66794e-10	802976, 808953, 794878, 825820, 822491, 815528, 786096, 794115, 794587, 801728, 805574, 799778, 822573, 783885, 782130, 815507, 801440, 795963, 789529, 815272, 811889, 782125, 772395, 820625, 792407	139	504	12983	4.63308	2.09714e-07	1.04857e-07	7.81594e-07
GOTERM_CC_FAT	GO:0015629~actin cytoskeleton	18	12.1622	2.60632e-09	802976, 795829, 822573, 783885, 782130, 815507, 794878, 801440, 825820, 822836, 825519, 786096, 794115, 811889, 805574, 801728, 772395, 792407	134	269	12782	6.38284	7.01101e-07	2.337e-07	3.42486e-06
GOTERM_BP_FAT	GO:0030036~actin cytoskeleton organization	15	10.1351	5.63588e-08	795829, 784977, 808953, 794878, 801440, 825820, 822491, 795963, 789529, 815528, 786096, 794115, 805574, 772395, 792407	136	226	13528	6.60203	7.43344e-05	1.48673e-05	9.21852e-05
GOTERM_CC_FAT	GO:0005856~cytoskeleton	37	25	1.23694e-07	802976, 784511, 808953, 817614, 814359, 794878, 772317, 825820, 822491, 815528, 794115, 786096, 823922, 794587, 805574, 801728, 791118, 791411, 799778, 795829, 822573, 783885, 782130, 815507, 801440, 791999, 795963, 822836, 789529, 815272, 825519, 811889, 782125, 796391, 772395, 783835, 792407	134	1381	12782	2.55565	3.32731e-05	6.65471e-06	0.000162541
GOTERM_BP_FAT	GO:0030029~actin filament-based process	15	10.1351	1.25318e-07	795829, 784977, 808953, 794878, 801440, 825820, 822491, 795963, 789529, 815528, 786096, 794115, 805574, 772395, 792407	136	241	13528	6.19112	0.000165281	2.06617e-05	0.000204981
SP_PIR_KEYWORDS	cytoskeleton	20	13.5135	4.00314e-07	799778, 802976, 795829, 822573, 808953, 782130, 815507, 822491, 795963, 822836, 789529, 815528, 815272, 794115, 823922, 794587, 811889, 801728, 772395, 791411	148	636	19235	4.08699	0.000121288	1.10268e-05	0.000535751
GOTERM_BP_FAT	GO:0007010~cytoskeleton organization	18	12.1622	1.56838e-06	795829, 822573, 784977, 808953, 794878, 801440, 772317, 825820, 822491, 795963, 789529, 815528, 786096, 794115, 801728, 805574, 772395, 792407	136	436	13528	4.10658	0.00206655	0.000159117	0.00256534
GOTERM_CC_FAT	GO:0043228~non-membrane-bounded organelle	51	34.4595	2.92317e-06	796817, 799749, 808953, 817614, 814359, 825820, 823922, 794587, 805574, 801728, 791118, 823660, 791411, 795829, 786754, 783885, 782130, 815507, 801440, 795963, 789529, 811889, 782125, 772395, 811161, 792407, 802976, 812540, 784511, 794878, 809635, 772317, 820161, 822491, 815528, 786096, 794115, 801125, 799778, 825605, 822573, 795791, 799635, 791999, 822836, 791264, 815272, 825519, 814248, 796391,…	134	2596	12782	1.87396	0.000786025	7.14823e-05	0.00384114
GOTERM_CC_FAT	GO:0043232~intracellular non-membrane-bounded organelle	51	34.4595	2.92317e-06	796817, 799749, 808953, 817614, 814359, 825820, 823922, 794587, 805574, 801728, 791118, 823660, 791411, 795829, 786754, 783885, 782130, 815507, 801440, 795963, 789529, 811889, 782125, 772395, 811161, 792407, 802976, 812540, 784511, 794878, 809635, 772317, 820161, 822491, 815528, 786096, 794115, 801125, 799778, 825605, 822573, 795791, 799635, 791999, 822836, 791264, 815272, 825519, 814248, 796391,…	134	2596	12782	1.87396	0.000786025	7.14823e-05	0.00384114
GOTERM_CC_FAT	GO:0030863~cortical cytoskeleton	7	4.72973	1.09793e-05	802976, 786096, 794115, 822573, 805574, 794878, 825820	134	49	12782	13.6269	0.00294908	0.000196876	0.0144264
GOTERM_CC_FAT	GO:0005938~cell cortex	10	6.75676	2.11491e-05	795963, 802976, 786096, 794115, 822573, 823922, 805574, 815507, 794878, 825820	134	146	12782	6.53343	0.00567303	0.000299386	0.0277876
GOTERM_CC_FAT	GO:0030864~cortical actin cytoskeleton	5	3.37838	0.000188983	802976, 794115, 822573, 805574, 825820	134	28	12782	17.0336	0.0495705	0.00181411	0.24805
GOTERM_CC_FAT	GO:0044448~cell cortex part	7	4.72973	0.000222007	802976, 786096, 794115, 822573, 805574, 794878, 825820	134	83	12782	8.04478	0.057978	0.00198891	0.291338
GOTERM_CC_FAT	GO:0044430~cytoskeletal part	21	14.1892	0.00195189	802976, 795829, 822573, 814359, 782130, 815507, 794878, 801440, 772317, 825820, 791999, 795963, 822836, 825519, 786096, 794115, 811889, 805574, 801728, 782125, 783835	134	952	12782	2.10415	0.408782	0.0116114	2.53472
GOTERM_BP_FAT	GO:0000910~cytokinesis	3	2.02703	0.0629636	794115, 794878, 825820	136	41	13528	7.27834	1	0.535076	65.4837
GOTERM_BP_FAT	GO:0051301~cell division	4	2.7027	0.567566	795963, 794115, 794878, 825820	136	295	13528	1.34875	1	0.990587	99.9999
Annotation Cluster 3	Enrichment Score: 4.384353209404583
Category	Term	Count	%	PValue	Genes	List Total	Pop Hits	Pop Total	Fold Enrichment	Bonferroni	Benjamini	FDR
GOTERM_CC_FAT	GO:0001726~ruffle	8	5.40541	5.83102e-06	783393, 789529, 795829, 823922, 784977, 782125, 794878, 788149	134	67	12782	11.3896	0.00156732	0.00012065	0.00766202
GOTERM_CC_FAT	GO:0031252~cell leading edge	10	6.75676	1.34567e-05	795963, 783393, 789529, 775626, 795829, 823922, 784977, 782125, 794878, 788149	134	138	12782	6.91218	0.00361332	0.000212911	0.0176814
GOTERM_CC_FAT	GO:0042995~cell projection	18	12.1622	0.000895898	799778, 783393, 795829, 775626, 784977, 808953, 817614, 814359, 794878, 801440, 794884, 788149, 795963, 789529, 786096, 823922, 782125, 826073	134	697	12782	2.46339	0.214241	0.00649516	1.17088
Annotation Cluster 4	Enrichment Score: 4.205363296575949
Category	Term	Count	%	PValue	Genes	List Total	Pop Hits	Pop Total	Fold Enrichment	Bonferroni	Benjamini	FDR
GOTERM_CC_FAT	GO:0044449~contractile fiber part	10	6.75676	2.60882e-06	802976, 825519, 811889, 794587, 784511, 783039, 808953, 783885, 782130, 792407	134	113	12782	8.44142	0.000701528	7.79718e-05	0.00342809
GOTERM_CC_FAT	GO:0043292~contractile fiber	10	6.75676	4.60277e-06	802976, 825519, 811889, 794587, 784511, 783039, 808953, 783885, 782130, 792407	134	121	12782	7.88331	0.00123738	0.000103174	0.00604814
GOTERM_CC_FAT	GO:0030017~sarcomere	9	6.08108	7.97817e-06	802976, 811889, 794587, 784511, 783039, 808953, 783885, 782130, 792407	134	98	12782	8.76013	0.00214383	0.000153284	0.0104833
GOTERM_CC_FAT	GO:0030016~myofibril	9	6.08108	1.9992e-05	802976, 811889, 794587, 784511, 783039, 808953, 783885, 782130, 792407	134	111	12782	7.73417	0.00536347	0.000298728	0.0262675
GOTERM_CC_FAT	GO:0031674~I band	5	3.37838	0.00253484	794587, 784511, 808953, 783885, 792407	134	55	12782	8.67164	0.494769	0.0138368	3.28016
GOTERM_CC_FAT	GO:0030018~Z disc	4	2.7027	0.0120683	794587, 784511, 808953, 783885	134	46	12782	8.29461	0.961846	0.0513157	14.7472
Annotation Cluster 5	Enrichment Score: 3.9650017198717014
Category	Term	Count	%	PValue	Genes	List Total	Pop Hits	Pop Total	Fold Enrichment	Bonferroni	Benjamini	FDR
GOTERM_BP_FAT	GO:0006414~translational elongation	13	8.78378	3.33195e-10	825605, 796817, 799749, 793126, 786754, 795791, 799635, 796244, 781923, 821677, 801125, 814248, 811161	136	101	13528	12.8031	4.39484e-07	4.39484e-07	5.45002e-07
SP_PIR_KEYWORDS	protein biosynthesis	14	9.45946	2.18262e-09	825605, 793126, 799749, 795791, 795388, 799635, 796244, 781923, 821677, 775824, 801125, 814248, 811161, 820495	148	188	19235	9.67834	6.61334e-07	1.10222e-07	2.92107e-06
GOTERM_BP_FAT	GO:0006412~translation	16	10.8108	1.06443e-06	825605, 796817, 793126, 799749, 786754, 795791, 795388, 799635, 796244, 781923, 821677, 775824, 801125, 814248, 811161, 820495	136	331	13528	4.80825	0.001403	0.000127627	0.00174106
GOTERM_MF_FAT	GO:0005198~structural molecule activity	21	14.1892	1.1873e-05	799778, 802976, 825605, 796817, 799749, 786754, 779124, 817614, 814359, 795791, 782130, 789529, 805919, 783500, 825519, 814248, 811889, 801125, 811161, 817654, 804645	139	634	12983	3.09379	0.00438341	0.00146328	0.0163714
SP_PIR_KEYWORDS	ribosome	7	4.72973	2.0088e-05	825605, 799749, 786754, 801125, 814248, 795791, 811161	148	73	19235	12.4625	0.00606823	0.000357978	0.026881
GOTERM_CC_FAT	GO:0044445~cytosolic part	10	6.75676	2.91292e-05	825605, 815675, 799749, 786754, 801125, 814248, 783039, 796391, 795791, 811161	134	152	12782	6.27553	0.00780526	0.000391717	0.0382707
GOTERM_CC_FAT	GO:0022626~cytosolic ribosome	7	4.72973	0.000194152	825605, 799749, 786754, 801125, 814248, 795791, 811161	134	81	12782	8.24341	0.0508914	0.00179948	0.254827
KEGG_PATHWAY	hsa03010:Ribosome	8	5.40541	0.000524642	796817, 825605, 799749, 786754, 801125, 814248, 795791, 811161	85	87	5085	5.50101	0.0461321	0.0233384	0.569267
SP_PIR_KEYWORDS	ribosomal protein	8	5.40541	0.0006173	796817, 825605, 799749, 786754, 801125, 814248, 795791, 811161	148	188	19235	5.53048	0.170639	0.00665985	0.823
GOTERM_CC_FAT	GO:0022625~cytosolic large ribosomal subunit	5	3.37838	0.000628655	825605, 786754, 801125, 795791, 811161	134	38	12782	12.5511	0.155627	0.00511298	0.822943
SP_PIR_KEYWORDS	ribonucleoprotein	9	6.08108	0.00139107	796817, 825605, 791264, 799749, 786754, 801125, 814248, 795791, 811161	148	279	19235	4.19246	0.344127	0.0135139	1.84576
GOTERM_MF_FAT	GO:0003735~structural constituent of ribosome	8	5.40541	0.00210277	796817, 825605, 799749, 786754, 801125, 814248, 795791, 811161	139	168	12983	4.44776	0.541064	0.0628423	2.86099
GOTERM_CC_FAT	GO:0033279~ribosomal subunit	7	4.72973	0.00218127	825605, 799749, 786754, 801125, 814248, 795791, 811161	134	128	12782	5.21653	0.444231	0.0124201	2.82867
GOTERM_CC_FAT	GO:0015934~large ribosomal subunit	5	3.37838	0.00517692	825605, 786754, 801125, 795791, 811161	134	67	12782	7.11851	0.752466	0.0264929	6.59304
GOTERM_CC_FAT	GO:0005840~ribosome	8	5.40541	0.00720613	796817, 825605, 799749, 786754, 801125, 814248, 795791, 811161	134	215	12782	3.54932	0.85708	0.0353859	9.06594
GOTERM_CC_FAT	GO:0030529~ribonucleoprotein complex	12	8.10811	0.0185278	796817, 825605, 793126, 791264, 823976, 799749, 786754, 786096, 801125, 814248, 795791, 811161	134	515	12782	2.22263	0.993466	0.0755952	21.7882
GOTERM_MF_FAT	GO:0003723~RNA binding	14	9.45946	0.0419747	825605, 796817, 799749, 786754, 795791, 794852, 775955, 791264, 775824, 801125, 814248, 811161, 820495, 804644	139	718	12983	1.82123	1	0.381704	44.6403
Annotation Cluster 6	Enrichment Score: 3.933318235572465
Category	Term	Count	%	PValue	Genes	List Total	Pop Hits	Pop Total	Fold Enrichment	Bonferroni	Benjamini	FDR
GOTERM_BP_FAT	GO:0006091~generation of precursor metabolites and energy	19	12.8378	2.03378e-09	796931, 797595, 787383, 812048, 794852, 794884, 818987, 801768, 820161, 803359, 813015, 822387, 783039, 813329, 821792, 777438, 792407, 788119, 799188	136	313	13528	6.03815	2.68255e-06	1.34128e-06	3.32662e-06
GOTERM_BP_FAT	GO:0006096~glycolysis	9	6.08108	1.80952e-08	797595, 812048, 783039, 813329, 821792, 777438, 794884, 801768, 792407	136	47	13528	19.0476	2.38673e-05	7.95583e-06	2.95981e-05
GOTERM_BP_FAT	GO:0046365~monosaccharide catabolic process	10	6.75676	3.31184e-08	797595, 812048, 783039, 813329, 802330, 821792, 777438, 794884, 801768, 792407	136	71	13528	14.0099	4.36823e-05	1.09207e-05	5.41713e-05
SP_PIR_KEYWORDS	glycolysis	8	5.40541	3.98942e-08	797595, 812048, 783039, 813329, 777438, 794884, 801768, 792407	148	44	19235	23.6302	1.20879e-05	1.72685e-06	5.33916e-05
GOTERM_BP_FAT	GO:0006007~glucose catabolic process	9	6.08108	1.006e-07	797595, 812048, 783039, 813329, 821792, 777438, 794884, 801768, 792407	136	58	13528	15.4351	0.000132682	2.21149e-05	0.000164549
GOTERM_BP_FAT	GO:0046164~alcohol catabolic process	10	6.75676	1.06658e-07	797595, 812048, 783039, 813329, 802330, 821792, 777438, 794884, 801768, 792407	136	81	13528	12.2803	0.000140672	2.00971e-05	0.000174458
GOTERM_BP_FAT	GO:0044275~cellular carbohydrate catabolic process	10	6.75676	1.62759e-07	797595, 812048, 783039, 813329, 802330, 821792, 777438, 794884, 801768, 792407	136	85	13528	11.7024	0.000214656	2.38529e-05	0.000266222
GOTERM_BP_FAT	GO:0019320~hexose catabolic process	9	6.08108	4.0026e-07	797595, 812048, 783039, 813329, 821792, 777438, 794884, 801768, 792407	136	69	13528	12.9744	0.000527804	5.27929e-05	0.000654698
KEGG_PATHWAY	hsa00010:Glycolysis / Gluconeogenesis	10	6.75676	4.41785e-07	797595, 812048, 819709, 783039, 813329, 787596, 777438, 794884, 801768, 792407	85	60	5085	9.97059	3.97598e-05	3.97598e-05	0.000480605
GOTERM_BP_FAT	GO:0016052~carbohydrate catabolic process	10	6.75676	1.37745e-06	797595, 812048, 783039, 813329, 802330, 821792, 777438, 794884, 801768, 792407	136	109	13528	9.12574	0.00181521	0.000151393	0.00225305
BIOCARTA	h_glycolysisPathway:Glycolysis Pathway	5	3.37838	8.64302e-05	797595, 783039, 813329, 777438, 801768	36	11	1437	18.1439	0.00457052	0.00457052	0.0842937
UP_SEQ_FEATURE	binding site:Substrate	11	7.43243	0.000102924	796931, 797595, 775626, 812048, 783039, 813329, 807457, 795388, 821792, 794884, 792407	148	297	19113	4.78303	0.0691328	0.0235967	0.154984
SP_PIR_KEYWORDS	oxidoreductase	15	10.1351	0.000106317	813997, 812048, 793882, 787596, 794884, 801768, 784216, 812449, 803359, 813015, 819709, 783505, 807457, 821792, 788119	148	562	19235	3.46885	0.0317024	0.00153291	0.142194
GOTERM_BP_FAT	GO:0006006~glucose metabolic process	9	6.08108	0.000146861	797595, 812048, 783039, 813329, 821792, 777438, 794884, 801768, 792407	136	153	13528	5.85121	0.176114	0.0120347	0.239947
UP_SEQ_FEATURE	nucleotide phosphate-binding region:NAD	6	4.05405	0.000299424	812048, 807457, 787596, 821792, 794884, 801768	148	76	19113	10.1954	0.188143	0.034142	0.450255
GOTERM_BP_FAT	GO:0005996~monosaccharide metabolic process	10	6.75676	0.000383651	797595, 812048, 783039, 813329, 802330, 821792, 777438, 794884, 801768, 792407	136	222	13528	4.48066	0.397177	0.0249891	0.625687
SP_PIR_KEYWORDS	gluconeogenesis	4	2.7027	0.000387366	797595, 813329, 801768, 792407	148	19	19235	27.3613	0.110766	0.00487949	0.517181
UP_SEQ_FEATURE	binding site:NAD	5	3.37838	0.000587669	812048, 807457, 821792, 794884, 801768	148	50	19113	12.9142	0.335777	0.044442	0.88191
SP_PIR_KEYWORDS	nad	8	5.40541	0.000634189	812048, 819709, 783505, 807457, 787596, 821792, 794884, 801768	148	189	19235	5.50122	0.174875	0.00660636	0.845428
GOTERM_BP_FAT	GO:0019318~hexose metabolic process	9	6.08108	0.000678684	797595, 812048, 783039, 813329, 821792, 777438, 794884, 801768, 792407	136	192	13528	4.66268	0.591592	0.0366245	1.10435
INTERPRO	IPR016040:NAD(P)-binding domain	7	4.72973	0.00201725	812048, 783505, 807457, 821792, 794884, 801768, 812449	146	150	16659	5.32479	0.565676	0.0884991	2.78996
INTERPRO	IPR001557:L-lactate/malate dehydrogenase	3	2.02703	0.00203557	812048, 821792, 794884	146	8	16659	42.7885	0.568957	0.0807109	2.81496
INTERPRO	IPR001236:Lactate/malate dehydrogenase	3	2.02703	0.00203557	812048, 821792, 794884	146	8	16659	42.7885	0.568957	0.0807109	2.81496
INTERPRO	IPR015955:Lactate dehydrogenase/glycoside hydrolase, family 4, C-terminal	3	2.02703	0.00260224	812048, 821792, 794884	146	9	16659	38.0342	0.659086	0.0857737	3.58541
GOTERM_BP_FAT	GO:0055114~oxidation reduction	15	10.1351	0.00466733	813997, 812048, 793882, 787596, 794884, 801768, 784216, 812449, 803359, 819709, 783505, 807457, 821792, 788119, 799188	136	639	13528	2.33499	0.99791	0.133682	7.3667
PIR_SUPERFAMILY	PIRSF000102:Lac_mal_DH	3	2.02703	0.00548522	812048, 821792, 794884	108	8	7396	25.6806	0.462881	0.267116	6.05421
GOTERM_MF_FAT	GO:0051287~NAD or NADH binding	4	2.7027	0.0135497	812048, 819709, 807457, 801768	139	47	12983	7.94918	0.993576	0.223053	17.1488
KEGG_PATHWAY	hsa00620:Pyruvate metabolism	4	2.7027	0.0276983	812048, 787596, 821792, 794884	85	40	5085	5.98235	0.920184	0.270943	26.33
GOTERM_MF_FAT	GO:0048037~cofactor binding	7	4.72973	0.0498467	774195, 812048, 819709, 812540, 783505, 807457, 801768	139	249	12983	2.62578	1	0.417565	50.5939
GOTERM_BP_FAT	GO:0006090~pyruvate metabolic process	3	2.02703	0.0656918	812048, 813329, 794884	136	42	13528	7.10504	1	0.541293	67.0912
KEGG_PATHWAY	hsa00640:Propanoate metabolism	3	2.02703	0.0972798	812048, 787596, 794884	85	32	5085	5.60846	0.9999	0.400532	67.1546
UP_SEQ_FEATURE	active site:Proton acceptor	8	5.40541	0.243716	812048, 783039, 813329, 807457, 787596, 821792, 794884, 792407	148	658	19113	1.57011	1	0.998111	98.5144
GOTERM_MF_FAT	GO:0050662~coenzyme binding	4	2.7027	0.302452	812048, 819709, 807457, 801768	139	181	12983	2.06415	1	0.863179	99.3035
Annotation Cluster 7	Enrichment Score: 3.416620562961484
Category	Term	Count	%	PValue	Genes	List Total	Pop Hits	Pop Total	Fold Enrichment	Bonferroni	Benjamini	FDR
GOTERM_BP_FAT	GO:0043066~negative regulation of apoptosis	13	8.78378	0.000220518	815675, 817614, 817433, 809635, 791999, 794115, 782125, 818455, 791118, 824963, 817654, 820495, 804644	136	354	13528	3.65287	0.252406	0.0169659	0.360088
GOTERM_BP_FAT	GO:0043069~negative regulation of programmed cell death	13	8.78378	0.000250808	815675, 817614, 817433, 809635, 791999, 794115, 782125, 818455, 791118, 824963, 817654, 820495, 804644	136	359	13528	3.602	0.281692	0.018213	0.409454
GOTERM_BP_FAT	GO:0060548~negative regulation of cell death	13	8.78378	0.000257273	815675, 817614, 817433, 809635, 791999, 794115, 782125, 818455, 791118, 824963, 817654, 820495, 804644	136	360	13528	3.59199	0.287793	0.0177039	0.419988
GOTERM_BP_FAT	GO:0042981~regulation of apoptosis	20	13.5135	0.000390257	815675, 808953, 817614, 797325, 817433, 809635, 775480, 791999, 783770, 786096, 794115, 782125, 818455, 791118, 824963, 793142, 791792, 820495, 817654, 804644	136	804	13528	2.47439	0.402409	0.0242185	0.636428
GOTERM_BP_FAT	GO:0043067~regulation of programmed cell death	20	13.5135	0.000441158	815675, 808953, 817614, 797325, 817433, 809635, 775480, 791999, 783770, 786096, 794115, 782125, 818455, 791118, 824963, 793142, 791792, 820495, 817654, 804644	136	812	13528	2.45001	0.441229	0.0261084	0.719156
GOTERM_BP_FAT	GO:0010941~regulation of cell death	20	13.5135	0.000461686	815675, 808953, 817614, 797325, 817433, 809635, 775480, 791999, 783770, 786096, 794115, 782125, 818455, 791118, 824963, 793142, 791792, 820495, 817654, 804644	136	815	13528	2.441	0.456162	0.0261352	0.752501
GOTERM_BP_FAT	GO:0006916~anti-apoptosis	9	6.08108	0.00107198	815675, 794115, 817614, 818455, 817433, 791118, 817654, 791999, 804644	136	206	13528	4.3458	0.757001	0.046062	1.73906
Annotation Cluster 8	Enrichment Score: 3.367556367017487
Category	Term	Count	%	PValue	Genes	List Total	Pop Hits	Pop Total	Fold Enrichment	Bonferroni	Benjamini	FDR
SP_PIR_KEYWORDS	molecular chaperone	5	3.37838	2.21907e-06	823976, 796391, 824963, 800499, 791792	148	13	19235	49.987	0.000672154	5.17202e-05	0.00296981
GOTERM_MF_FAT	GO:0051082~unfolded protein binding	9	6.08108	3.0238e-05	784769, 815675, 823976, 785761, 796391, 824963, 800499, 791792, 804644	139	115	12983	7.30979	0.0111259	0.00279315	0.0416893
SP_PIR_KEYWORDS	heat shock	3	2.02703	0.000344575	824963, 800499, 791792	148	4	19235	97.4747	0.0991571	0.0045299	0.460173
GOTERM_BP_FAT	GO:0006986~response to unfolded protein	6	4.05405	0.000705797	823976, 785761, 824963, 800499, 791792, 820495	136	71	13528	8.40597	0.605949	0.0365657	1.14823
SP_PIR_KEYWORDS	Chaperone	7	4.72973	0.00136316	823976, 785761, 796391, 824963, 800499, 791792, 804644	148	158	19235	5.758	0.338549	0.0136829	1.80904
SP_PIR_KEYWORDS	stress-induced protein	3	2.02703	0.001576	824963, 800499, 791792	148	8	19235	48.7373	0.379919	0.0148236	2.08875
SP_PIR_KEYWORDS	stress response	5	3.37838	0.00163429	823976, 785761, 824963, 800499, 791792	148	66	19235	9.84593	0.390791	0.0149058	2.16522
GOTERM_BP_FAT	GO:0006457~protein folding	8	5.40541	0.0019816	784769, 823976, 785761, 796391, 824963, 791792, 820495, 804644	136	177	13528	4.49585	0.926929	0.076221	3.19242
GOTERM_BP_FAT	GO:0051789~response to protein stimulus	6	4.05405	0.00433367	823976, 785761, 824963, 800499, 791792, 820495	136	107	13528	5.57779	0.996748	0.127501	6.85747
Annotation Cluster 9	Enrichment Score: 3.0424949084491537
Category	Term	Count	%	PValue	Genes	List Total	Pop Hits	Pop Total	Fold Enrichment	Bonferroni	Benjamini	FDR
GOTERM_CC_FAT	GO:0042641~actomyosin	5	3.37838	0.000163296	822836, 795829, 786096, 794878, 801440	134	27	12782	17.6645	0.0429792	0.00168819	0.214367
GOTERM_CC_FAT	GO:0001725~stress fiber	4	2.7027	0.00189969	822836, 795829, 786096, 794878	134	24	12782	15.898	0.400405	0.0115577	2.46771
GOTERM_CC_FAT	GO:0032432~actin filament bundle	4	2.7027	0.00240358	822836, 795829, 786096, 794878	134	26	12782	14.6751	0.476564	0.0133957	3.11277
Annotation Cluster 10	Enrichment Score: 2.795841084103699
Category	Term	Count	%	PValue	Genes	List Total	Pop Hits	Pop Total	Fold Enrichment	Bonferroni	Benjamini	FDR
GOTERM_MF_FAT	GO:0042802~identical protein binding	20	13.5135	4.61103e-05	783393, 825605, 814144, 775626, 812048, 784977, 784511, 785761, 794878, 788149, 795963, 809178, 786096, 819709, 782125, 791118, 807457, 794622, 817654, 792407	139	640	12983	2.91884	0.0169165	0.0028395	0.0635661
GOTERM_MF_FAT	GO:0042803~protein homodimerization activity	11	7.43243	0.00299438	795963, 783393, 825605, 775626, 814144, 786096, 819709, 785761, 794622, 794878, 788149	139	334	12983	3.07614	0.670304	0.0761965	4.05103
GOTERM_MF_FAT	GO:0046983~protein dimerization activity	12	8.10811	0.0296737	795963, 783393, 825605, 775626, 814144, 786096, 819709, 784977, 785761, 794622, 794878, 788149	139	542	12983	2.06796	0.999986	0.310312	33.9915
Annotation Cluster 11	Enrichment Score: 2.7829132439587583
Category	Term	Count	%	PValue	Genes	List Total	Pop Hits	Pop Total	Fold Enrichment	Bonferroni	Benjamini	FDR
SMART	SM00132:LIM	7	4.72973	1.6193e-05	822836, 795829, 822573, 784511, 783885, 790175, 791411	69	73	9079	12.6172	0.00103582	0.000518045	0.0164493
SP_PIR_KEYWORDS	LIM domain	7	4.72973	1.71136e-05	822836, 795829, 822573, 784511, 783885, 790175, 791411	148	71	19235	12.8136	0.00517206	0.000345639	0.0229013
INTERPRO	IPR001781:Zinc finger, LIM-type	7	4.72973	4.13069e-05	822836, 795829, 822573, 784511, 783885, 790175, 791411	146	73	16659	10.9414	0.0169154	0.00849377	0.0578677
GOTERM_CC_FAT	GO:0005925~focal adhesion	7	4.72973	0.000674362	822836, 789529, 822573, 784977, 784511, 808953, 791411	134	102	12782	6.54624	0.165952	0.00532297	0.882532
GOTERM_CC_FAT	GO:0005924~cell-substrate adherens junction	7	4.72973	0.000825937	822836, 789529, 822573, 784977, 784511, 808953, 791411	134	106	12782	6.29921	0.1993	0.00615512	1.0799
GOTERM_CC_FAT	GO:0030055~cell-substrate junction	7	4.72973	0.0011011	822836, 789529, 822573, 784977, 784511, 808953, 791411	134	112	12782	5.96175	0.256479	0.00757015	1.43728
GOTERM_CC_FAT	GO:0005912~adherens junction	8	5.40541	0.00117009	822836, 789529, 822573, 784977, 784511, 808953, 794878, 791411	134	155	12782	4.92325	0.270167	0.00765202	1.52669
GOTERM_CC_FAT	GO:0016323~basolateral plasma membrane	9	6.08108	0.00126909	822836, 799778, 789529, 822573, 784977, 784511, 808953, 817614, 791411	134	203	12782	4.22903	0.28937	0.00810041	1.65487
GOTERM_CC_FAT	GO:0070161~anchoring junction	8	5.40541	0.0021256	822836, 789529, 822573, 784977, 784511, 808953, 794878, 791411	134	172	12782	4.43665	0.435827	0.0123663	2.7574
GOTERM_CC_FAT	GO:0030054~cell junction	9	6.08108	0.172063	822836, 789529, 814144, 822573, 784977, 784511, 808953, 794878, 791411	134	518	12782	1.65732	1	0.457709	91.6355
BIOCARTA	h_integrinPathway:Integrin Signaling Pathway	3	2.02703	0.199671	822836, 789529, 784977	36	34	1437	3.52206	0.999993	0.947723	88.6174
GOTERM_CC_FAT	GO:0044459~plasma membrane part	24	16.2162	0.529039	788455, 799778, 802976, 814144, 822573, 784977, 784511, 808953, 817614, 794878, 822836, 805919, 789529, 812139, 783770, 783500, 794622, 791118, 824963, 794360, 826073, 817654, 791781, 791411	134	2203	12782	1.03918	1	0.873416	99.995
Annotation Cluster 12	Enrichment Score: 2.7579551810903955
Category	Term	Count	%	PValue	Genes	List Total	Pop Hits	Pop Total	Fold Enrichment	Bonferroni	Benjamini	FDR
GOTERM_BP_FAT	GO:0007015~actin filament organization	6	4.05405	0.000752466	786096, 794115, 808953, 801440, 825820, 792407	136	72	13528	8.28922	0.62949	0.0374676	1.22371
UP_SEQ_FEATURE	domain:ADF-H	3	2.02703	0.00159588	794115, 801440, 825820	148	8	19113	48.4282	0.670973	0.0884736	2.37802
SMART	SM00102:ADF	3	2.02703	0.00239286	794115, 801440, 825820	69	10	9079	39.4739	0.14215	0.0376062	2.40445
INTERPRO	IPR002108:Actin-binding, cofilin/tropomyosin type	3	2.02703	0.00323427	794115, 801440, 825820	146	10	16659	34.2308	0.737609	0.097798	4.43803
Annotation Cluster 13	Enrichment Score: 2.3771696646818046
Category	Term	Count	%	PValue	Genes	List Total	Pop Hits	Pop Total	Fold Enrichment	Bonferroni	Benjamini	FDR
SMART	SM00101:14_3_3	4	2.7027	1.37681e-05	797325, 815903, 791999, 820893	69	7	9079	75.1884	0.000880774	0.000880774	0.0139861
UP_SEQ_FEATURE	site:Interaction with phosphoserine on interacting protein	4	2.7027	1.52527e-05	797325, 815903, 791999, 820893	148	7	19113	73.7954	0.0105598	0.0105598	0.0229819
INTERPRO	IPR000308:14-3-3 protein	4	2.7027	2.20358e-05	797325, 815903, 791999, 820893	146	7	16659	65.2016	0.0090596	0.0090596	0.0308743
PIR_SUPERFAMILY	PIRSF000868:14-3-3 protein	4	2.7027	9.87924e-05	797325, 815903, 791999, 820893	108	7	7396	39.1323	0.011102	0.011102	0.112115
PIR_SUPERFAMILY	PIRSF000868:14-3-3	4	2.7027	9.87924e-05	797325, 815903, 791999, 820893	108	7	7396	39.1323	0.011102	0.011102	0.112115
GOTERM_BP_FAT	GO:0046907~intracellular transport	17	11.4865	0.000843791	802976, 823976, 787383, 785761, 797325, 794878, 791999, 798427, 815359, 820893, 795963, 805919, 783500, 823629, 815903, 794622, 823660	136	657	13528	2.57382	0.67157	0.0403994	1.37127
GOTERM_BP_FAT	GO:0008104~protein localization	18	12.1622	0.00673118	809511, 802976, 797325, 794878, 791999, 798427, 815359, 820893, 822491, 789529, 805919, 815528, 786096, 783500, 815903, 823660, 814242, 804644	136	882	13528	2.03001	0.999865	0.169388	10.459
GOTERM_BP_FAT	GO:0006886~intracellular protein transport	10	6.75676	0.0126594	805919, 802976, 783500, 797325, 815903, 823660, 815359, 798427, 791999, 820893	136	374	13528	2.65964	1	0.259239	18.811
GOTERM_BP_FAT	GO:0015031~protein transport	15	10.1351	0.0198622	809511, 802976, 797325, 794878, 791999, 798427, 815359, 820893, 805919, 786096, 783500, 815903, 823660, 814242, 804644	136	762	13528	1.95808	1	0.338647	27.9747
GOTERM_BP_FAT	GO:0045184~establishment of protein localization	15	10.1351	0.0213033	809511, 802976, 797325, 794878, 791999, 798427, 815359, 820893, 805919, 786096, 783500, 815903, 823660, 814242, 804644	136	769	13528	1.94026	1	0.345524	29.6875
GOTERM_BP_FAT	GO:0034613~cellular protein localization	10	6.75676	0.0219887	805919, 802976, 783500, 797325, 815903, 823660, 815359, 798427, 791999, 820893	136	411	13528	2.42021	1	0.346247	30.4886
GOTERM_BP_FAT	GO:0070727~cellular macromolecule localization	10	6.75676	0.0229172	805919, 802976, 783500, 797325, 815903, 823660, 815359, 798427, 791999, 820893	136	414	13528	2.40267	1	0.353932	31.5602
GOTERM_MF_FAT	GO:0019904~protein domain specific binding	8	5.40541	0.0631804	789529, 785761, 797325, 815903, 818622, 793142, 791999, 820893	139	331	12983	2.25747	1	0.461612	59.3422
GOTERM_BP_FAT	GO:0006605~protein targeting	6	4.05405	0.0642443	802976, 797325, 815903, 823660, 791999, 820893	136	215	13528	2.77592	1	0.536185	66.2473
KEGG_PATHWAY	hsa04722:Neurotrophin signaling pathway	5	3.37838	0.148004	797325, 815903, 791118, 791999, 820893	85	124	5085	2.41224	0.999999	0.496644	82.4916
KEGG_PATHWAY	hsa04114:Oocyte meiosis	4	2.7027	0.272944	797325, 815903, 791999, 820893	85	110	5085	2.1754	1	0.682572	96.8809
KEGG_PATHWAY	hsa04110:Cell cycle	4	2.7027	0.341176	797325, 815903, 791999, 820893	85	125	5085	1.91435	1	0.764135	98.9323
Annotation Cluster 14	Enrichment Score: 2.289746781054366
Category	Term	Count	%	PValue	Genes	List Total	Pop Hits	Pop Total	Fold Enrichment	Bonferroni	Benjamini	FDR
UP_SEQ_FEATURE	domain:GST C-terminal	5	3.37838	0.000115546	809178, 781923, 818332, 817433, 796244	148	33	19113	19.567	0.0772755	0.0199054	0.173975
INTERPRO	IPR012335:Thioredoxin fold	7	4.72973	0.000251956	809178, 781923, 813997, 818332, 817433, 818622, 799188	146	101	16659	7.90811	0.0988386	0.0340955	0.352487
UP_SEQ_FEATURE	domain:GST N-terminal	4	2.7027	0.000535544	809178, 781923, 818332, 817433	148	21	19113	24.5985	0.311224	0.0455355	0.803981
INTERPRO	IPR004046:Glutathione S-transferase, C-terminal	4	2.7027	0.000765719	809178, 781923, 818332, 817433	146	21	16659	21.7339	0.271205	0.0513612	1.06767
INTERPRO	IPR004045:Glutathione S-transferase, N-terminal	4	2.7027	0.000880992	809178, 781923, 818332, 817433	146	22	16659	20.746	0.305116	0.0506725	1.22748
INTERPRO	IPR017933:Glutathione S-transferase/chloride channel, C-terminal	4	2.7027	0.00220743	809178, 781923, 818332, 817433	146	30	16659	15.2137	0.598551	0.0796216	3.04922
GOTERM_MF_FAT	GO:0004364~glutathione transferase activity	3	2.02703	0.0188032	809178, 818332, 817433	139	20	12983	14.0104	0.999109	0.253711	23.0304
INTERPRO	IPR010987:Glutathione S-transferase, C-terminal-like	3	2.02703	0.0261987	781923, 818332, 817433	146	29	16659	11.8037	0.999983	0.392485	31.0657
KEGG_PATHWAY	hsa00480:Glutathione metabolism	4	2.7027	0.048895	788455, 809178, 818332, 817433	85	50	5085	4.78588	0.989021	0.313385	42.0367
KEGG_PATHWAY	hsa00980:Metabolism of xenobiotics by cytochrome P450	4	2.7027	0.0760343	809178, 819709, 818332, 817433	85	60	5085	3.98824	0.999189	0.377793	57.6962
KEGG_PATHWAY	hsa00982:Drug metabolism	4	2.7027	0.0821193	809178, 819709, 818332, 817433	85	62	5085	3.85958	0.999553	0.382449	60.6304
GOTERM_MF_FAT	GO:0016765~transferase activity, transferring alkyl or aryl (other than methyl) groups	3	2.02703	0.0955005	809178, 818332, 817433	139	49	12983	5.71854	1	0.546235	74.9457
Annotation Cluster 15	Enrichment Score: 2.285777836470682
Category	Term	Count	%	PValue	Genes	List Total	Pop Hits	Pop Total	Fold Enrichment	Bonferroni	Benjamini	FDR
SMART	SM00033:CH	6	4.05405	0.000168659	802976, 786096, 794587, 808953, 790788, 820625	69	70	9079	11.2783	0.010737	0.00359189	0.171209
INTERPRO	IPR001715:Calponin-like actin-binding	6	4.05405	0.000358126	802976, 786096, 794587, 808953, 790788, 820625	146	70	16659	9.78023	0.137511	0.0363076	0.500673
UP_SEQ_FEATURE	domain:Actin-binding	4	2.7027	0.000461631	802976, 786096, 794587, 808953	148	20	19113	25.8284	0.274845	0.044872	0.69338
INTERPRO	IPR001589:Actinin-type, actin-binding, conserved site	4	2.7027	0.00100671	802976, 786096, 794587, 808953	146	23	16659	19.844	0.340307	0.0506688	1.4015
UP_SEQ_FEATURE	domain:CH 1	4	2.7027	0.00113869	802976, 786096, 794587, 808953	148	27	19113	19.1321	0.547505	0.0695519	1.70222
UP_SEQ_FEATURE	domain:CH 2	4	2.7027	0.00113869	802976, 786096, 794587, 808953	148	27	19113	19.1321	0.547505	0.0695519	1.70222
UP_SEQ_FEATURE	repeat:Spectrin 4	3	2.02703	0.0112108	802976, 786096, 808953	148	21	19113	18.4488	0.999609	0.387634	15.6243
UP_SEQ_FEATURE	repeat:Spectrin 3	3	2.02703	0.0122702	802976, 786096, 808953	148	22	19113	17.6103	0.999815	0.396775	16.9763
INTERPRO	IPR002017:Spectrin repeat	3	2.02703	0.0141777	802976, 786096, 808953	146	21	16659	16.3004	0.997253	0.255368	18.1346
UP_SEQ_FEATURE	repeat:Spectrin 1	3	2.02703	0.0169212	802976, 786096, 808953	148	26	19113	14.901	0.999993	0.46482	22.6761
UP_SEQ_FEATURE	repeat:Spectrin 2	3	2.02703	0.0169212	802976, 786096, 808953	148	26	19113	14.901	0.999993	0.46482	22.6761
SMART	SM00150:SPEC	3	2.02703	0.0223495	802976, 786096, 808953	69	31	9079	12.7335	0.764629	0.214236	20.5168
INTERPRO	IPR018159:Spectrin/alpha-actinin	3	2.02703	0.0296699	802976, 786096, 808953	146	31	16659	11.0422	0.999996	0.417736	34.4302
GOTERM_CC_FAT	GO:0005730~nucleolus	7	4.72973	0.740484	799778, 802976, 791264, 799749, 786096, 808953, 823660	134	698	12782	0.956614	1	0.967394	100
Annotation Cluster 16	Enrichment Score: 2.12975845259065
Category	Term	Count	%	PValue	Genes	List Total	Pop Hits	Pop Total	Fold Enrichment	Bonferroni	Benjamini	FDR
GOTERM_BP_FAT	GO:0016044~membrane organization	14	9.45946	0.00011213	823976, 795829, 785761, 798427, 820161, 795963, 805919, 783500, 805574, 782125, 794622, 826073, 817654, 806127	136	381	13528	3.65509	0.137489	0.00981202	0.183251
GOTERM_BP_FAT	GO:0016192~vesicle-mediated transport	15	10.1351	0.00183105	823976, 795829, 795388, 791999, 798427, 820161, 805919, 783500, 805574, 782125, 794622, 814242, 826073, 817654, 806127	136	576	13528	2.59038	0.910844	0.0727599	2.95328
GOTERM_BP_FAT	GO:0006897~endocytosis	8	5.40541	0.0065441	795829, 805574, 782125, 794622, 826073, 817654, 806127, 820161	136	220	13528	3.61711	0.999827	0.168277	10.1827
GOTERM_BP_FAT	GO:0010324~membrane invagination	8	5.40541	0.0065441	795829, 805574, 782125, 794622, 826073, 817654, 806127, 820161	136	220	13528	3.61711	0.999827	0.168277	10.1827
GOTERM_BP_FAT	GO:0006898~receptor-mediated endocytosis	4	2.7027	0.0158347	795829, 805574, 826073, 820161	136	53	13528	7.50721	1	0.300109	22.9779
GOTERM_MF_FAT	GO:0008034~lipoprotein binding	3	2.02703	0.0531248	826073, 817654, 820161	139	35	12983	8.00596	1	0.420668	52.8932
SP_PIR_KEYWORDS	Endocytosis	3	2.02703	0.166981	782125, 826073, 806127	148	96	19235	4.06144	1	0.573292	91.3283
Annotation Cluster 17	Enrichment Score: 2.0605123816102386
Category	Term	Count	%	PValue	Genes	List Total	Pop Hits	Pop Total	Fold Enrichment	Bonferroni	Benjamini	FDR
SP_PIR_KEYWORDS	calcium binding	10	6.75676	9.47707e-08	812139, 783393, 808953, 817614, 818455, 782629, 826073, 817654, 788149, 804644	148	103	19235	12.6181	2.87151e-05	3.19061e-06	0.000126834
SMART	SM00132:LIM	7	4.72973	1.6193e-05	822836, 795829, 822573, 784511, 783885, 790175, 791411	69	73	9079	12.6172	0.00103582	0.000518045	0.0164493
SP_PIR_KEYWORDS	LIM domain	7	4.72973	1.71136e-05	822836, 795829, 822573, 784511, 783885, 790175, 791411	148	71	19235	12.8136	0.00517206	0.000345639	0.0229013
UP_SEQ_FEATURE	domain:LIM zinc-binding 3	5	3.37838	3.74682e-05	822836, 795829, 784511, 783885, 791411	148	25	19113	25.8284	0.0257413	0.0129546	0.0564462
INTERPRO	IPR001781:Zinc finger, LIM-type	7	4.72973	4.13069e-05	822836, 795829, 822573, 784511, 783885, 790175, 791411	146	73	16659	10.9414	0.0169154	0.00849377	0.0578677
UP_SEQ_FEATURE	domain:LIM zinc-binding 2	5	3.37838	0.000587669	822836, 795829, 784511, 783885, 791411	148	50	19113	12.9142	0.335777	0.044442	0.88191
UP_SEQ_FEATURE	domain:LIM zinc-binding 1	5	3.37838	0.000587669	822836, 795829, 784511, 783885, 791411	148	50	19113	12.9142	0.335777	0.044442	0.88191
SP_PIR_KEYWORDS	calcium	15	10.1351	0.00343253	783393, 808953, 817614, 782629, 788149, 812139, 825519, 786096, 811889, 818455, 826073, 817654, 791781, 806127, 804644	148	803	19235	2.42776	0.647197	0.0285254	4.49749
GOTERM_MF_FAT	GO:0005509~calcium ion binding	17	11.4865	0.0346116	783393, 815675, 808953, 817614, 782629, 788149, 820161, 812139, 825519, 786096, 811889, 818455, 826073, 817654, 791781, 806127, 804644	139	919	12983	1.7278	0.999998	0.334547	38.4759
UP_SEQ_FEATURE	domain:PDZ	4	2.7027	0.0530684	795829, 779036, 783885, 790175	148	110	19113	4.69607	1	0.85007	56.0313
SMART	SM00228:PDZ	4	2.7027	0.100629	795829, 779036, 783885, 790175	69	149	9079	3.53234	0.998873	0.529616	65.9544
INTERPRO	IPR001478:PDZ/DHR/GLGF	4	2.7027	0.140735	795829, 779036, 783885, 790175	146	149	16659	3.06316	1	0.884686	88.0621
SP_PIR_KEYWORDS	metal-binding	21	14.1892	0.76544	788455, 795829, 822573, 784511, 783885, 794852, 790175, 775480, 788149, 803359, 822836, 819709, 811889, 783039, 782125, 818766, 794622, 826073, 791411, 791781, 811696	148	2972	19235	0.918335	1	0.991123	100
SP_PIR_KEYWORDS	zinc	14	9.45946	0.867024	788455, 822573, 795829, 784511, 783885, 790175, 775480, 822836, 819709, 794622, 818766, 791781, 791411, 811696	148	2189	19235	0.831214	1	0.998046	100
GOTERM_MF_FAT	GO:0046872~metal ion binding	37	25	0.942944	783393, 784511, 808953, 817614, 802330, 794852, 790175, 788149, 820161, 803359, 812139, 786096, 783039, 818455, 783505, 794622, 795261, 791781, 791411, 806127, 788119, 788455, 815675, 795829, 822573, 783885, 782629, 812449, 822836, 825519, 819709, 811889, 782125, 818766, 826073, 817654, 804644	139	4140	12983	0.83476	1	0.999987	100
GOTERM_MF_FAT	GO:0043169~cation binding	37	25	0.951003	783393, 784511, 808953, 817614, 802330, 794852, 790175, 788149, 820161, 803359, 812139, 786096, 783039, 818455, 783505, 794622, 795261, 791781, 791411, 806127, 788119, 788455, 815675, 795829, 822573, 783885, 782629, 812449, 822836, 825519, 819709, 811889, 782125, 818766, 826073, 817654, 804644	139	4179	12983	0.82697	1	0.999992	100
GOTERM_MF_FAT	GO:0043167~ion binding	37	25	0.961878	783393, 784511, 808953, 817614, 802330, 794852, 790175, 788149, 820161, 803359, 812139, 786096, 783039, 818455, 783505, 794622, 795261, 791781, 791411, 806127, 788119, 788455, 815675, 795829, 822573, 783885, 782629, 812449, 822836, 825519, 819709, 811889, 782125, 818766, 826073, 817654, 804644	139	4241	12983	0.81488	1	0.999996	100
GOTERM_MF_FAT	GO:0008270~zinc ion binding	16	10.8108	0.991193	788455, 822573, 795829, 784511, 783885, 790175, 788149, 812449, 822836, 819709, 783505, 794622, 818766, 791781, 791411, 788119	139	2311	12983	0.646666	1	1	100
GOTERM_MF_FAT	GO:0046914~transition metal ion binding	19	12.8378	0.996054	788455, 822573, 795829, 784511, 783885, 794852, 790175, 788149, 812449, 803359, 822836, 819709, 783505, 818766, 794622, 795261, 791411, 791781, 788119	139	2785	12983	0.637219	1	1	100
Annotation Cluster 18	Enrichment Score: 2.006796689802355
Category	Term	Count	%	PValue	Genes	List Total	Pop Hits	Pop Total	Fold Enrichment	Bonferroni	Benjamini	FDR
SP_PIR_KEYWORDS	endonexin fold	3	2.02703	0.00304946	812139, 817614, 818455	148	11	19235	35.4453	0.603627	0.0260935	4.00501
SMART	SM00335:ANX	3	2.02703	0.00474621	812139, 817614, 818455	69	14	9079	28.1957	0.262494	0.059079	4.71823
SP_PIR_KEYWORDS	annexin	3	2.02703	0.00497023	812139, 817614, 818455	148	14	19235	27.8499	0.779031	0.038951	6.45091
UP_SEQ_FEATURE	repeat:Annexin 4	3	2.02703	0.00503195	812139, 817614, 818455	148	14	19113	27.6733	0.970135	0.236684	7.32006
UP_SEQ_FEATURE	repeat:Annexin 3	3	2.02703	0.00503195	812139, 817614, 818455	148	14	19113	27.6733	0.970135	0.236684	7.32006
UP_SEQ_FEATURE	repeat:Annexin 2	3	2.02703	0.00503195	812139, 817614, 818455	148	14	19113	27.6733	0.970135	0.236684	7.32006
UP_SEQ_FEATURE	repeat:Annexin 1	3	2.02703	0.00503195	812139, 817614, 818455	148	14	19113	27.6733	0.970135	0.236684	7.32006
SP_PIR_KEYWORDS	calcium/phospholipid-binding	3	2.02703	0.00570626	812139, 817614, 818455	148	15	19235	25.9932	0.823414	0.0434864	7.37279
INTERPRO	IPR001464:Annexin	3	2.02703	0.00639292	812139, 817614, 818455	146	14	16659	24.4506	0.92926	0.161871	8.59512
INTERPRO	IPR018502:Annexin repeat	3	2.02703	0.00639292	812139, 817614, 818455	146	14	16659	24.4506	0.92926	0.161871	8.59512
INTERPRO	IPR018252:Annexin repeat, conserved site	3	2.02703	0.00639292	812139, 817614, 818455	146	14	16659	24.4506	0.92926	0.161871	8.59512
SP_PIR_KEYWORDS	phospholipid binding	3	2.02703	0.0121228	812139, 817614, 818455	148	22	19235	17.7227	0.975169	0.0771978	15.0608
PIR_SUPERFAMILY	PIRSF002359:annexin I	3	2.02703	0.0124507	812139, 817614, 818455	108	12	7396	17.1204	0.757259	0.376196	13.2601
GOTERM_MF_FAT	GO:0005544~calcium-dependent phospholipid binding	3	2.02703	0.0308611	812139, 817614, 818455	139	26	12983	10.7773	0.999991	0.312124	35.0967
GOTERM_MF_FAT	GO:0005543~phospholipid binding	5	3.37838	0.119802	812139, 817614, 818455, 794622, 815359	139	177	12983	2.6385	1	0.626055	82.7901
GOTERM_MF_FAT	GO:0008289~lipid binding	8	5.40541	0.202881	812139, 787383, 819709, 817614, 818455, 807457, 794622, 815359	139	450	12983	1.6605	1	0.78247	95.6144
Annotation Cluster 19	Enrichment Score: 1.8396843885988459
Category	Term	Count	%	PValue	Genes	List Total	Pop Hits	Pop Total	Fold Enrichment	Bonferroni	Benjamini	FDR
GOTERM_BP_FAT	GO:0006928~cell motion	16	10.8108	7.83904e-05	799778, 784977, 817614, 814359, 794878, 825820, 820161, 795963, 789529, 794115, 811889, 805574, 791118, 817654, 791781, 799188	136	475	13528	3.35059	0.0982347	0.00735857	0.128145
GOTERM_BP_FAT	GO:0007162~negative regulation of cell adhesion	5	3.37838	0.000865751	791118, 817654, 803900, 791781, 820161	136	43	13528	11.5663	0.680954	0.0399796	1.40672
GOTERM_BP_FAT	GO:0016477~cell migration	9	6.08108	0.0064653	795963, 799778, 794115, 784977, 805574, 794878, 817654, 791781, 820161	136	276	13528	3.24361	0.999808	0.169716	10.0661
GOTERM_BP_FAT	GO:0051674~localization of cell	9	6.08108	0.0118639	795963, 799778, 794115, 784977, 805574, 794878, 817654, 791781, 820161	136	307	13528	2.91608	1	0.265575	17.7344
GOTERM_BP_FAT	GO:0048870~cell motility	9	6.08108	0.0118639	795963, 799778, 794115, 784977, 805574, 794878, 817654, 791781, 820161	136	307	13528	2.91608	1	0.265575	17.7344
GOTERM_BP_FAT	GO:0030155~regulation of cell adhesion	6	4.05405	0.0120296	814144, 791118, 817654, 803900, 791781, 820161	136	137	13528	4.35638	1	0.264338	17.9596
GOTERM_BP_FAT	GO:0001525~angiogenesis	5	3.37838	0.0608162	788455, 794878, 817654, 791781, 820161	136	148	13528	3.36049	1	0.525541	64.1668
GOTERM_BP_FAT	GO:0048514~blood vessel morphogenesis	5	3.37838	0.160212	788455, 794878, 817654, 791781, 820161	136	211	13528	2.35712	1	0.773688	94.2502
GOTERM_BP_FAT	GO:0001568~blood vessel development	5	3.37838	0.229021	788455, 794878, 817654, 791781, 820161	136	245	13528	2.03001	1	0.85604	98.5797
GOTERM_BP_FAT	GO:0001944~vasculature development	5	3.37838	0.241889	788455, 794878, 817654, 791781, 820161	136	251	13528	1.98149	1	0.865602	98.9215
Annotation Cluster 20	Enrichment Score: 1.7603089101803768
Category	Term	Count	%	PValue	Genes	List Total	Pop Hits	Pop Total	Fold Enrichment	Bonferroni	Benjamini	FDR
GOTERM_MF_FAT	GO:0051082~unfolded protein binding	9	6.08108	3.0238e-05	784769, 815675, 823976, 785761, 796391, 824963, 800499, 791792, 804644	139	115	12983	7.30979	0.0111259	0.00279315	0.0416893
UP_SEQ_FEATURE	short sequence motif:Prevents secretion from ER	5	3.37838	0.00110092	784769, 815675, 782629, 800499, 804644	148	59	19113	10.9442	0.535439	0.073801	1.64619
INTERPRO	IPR000886:Endoplasmic reticulum, targeting sequence	4	2.7027	0.00701641	815675, 782629, 800499, 804644	146	45	16659	10.1425	0.945415	0.16619	9.39559
GOTERM_CC_FAT	GO:0005788~endoplasmic reticulum lumen	5	3.37838	0.00963442	784769, 815675, 782629, 800499, 804644	134	80	12782	5.96175	0.92604	0.0446602	11.9456
GOTERM_CC_FAT	GO:0044432~endoplasmic reticulum part	5	3.37838	0.489477	784769, 815675, 782629, 800499, 804644	134	347	12782	1.37447	1	0.850988	99.9854
SP_PIR_KEYWORDS	endoplasmic reticulum	6	4.05405	0.639677	784769, 815675, 782629, 814242, 800499, 804644	148	713	19235	1.09368	1	0.97142	99.9999
GOTERM_CC_FAT	GO:0005783~endoplasmic reticulum	10	6.75676	0.67592	784769, 815675, 814144, 777269, 782629, 807457, 814242, 794852, 800499, 804644	134	960	12782	0.993626	1	0.948777	100
Annotation Cluster 21	Enrichment Score: 1.7275671981226015
Category	Term	Count	%	PValue	Genes	List Total	Pop Hits	Pop Total	Fold Enrichment	Bonferroni	Benjamini	FDR
SP_PIR_KEYWORDS	elongation factor	5	3.37838	1.77115e-05	781923, 793126, 821677, 799635, 796244	148	21	19235	30.9443	0.00535225	0.000335358	0.0237012
GOTERM_MF_FAT	GO:0003746~translation elongation factor activity	5	3.37838	0.000110078	781923, 793126, 821677, 799635, 796244	139	24	12983	19.4589	0.0399128	0.00580184	0.151688
GOTERM_CC_FAT	GO:0005853~eukaryotic translation elongation factor 1 complex	3	2.02703	0.00105277	781923, 821677, 796244	134	5	12782	57.2328	0.24674	0.00742873	1.3746
GOTERM_MF_FAT	GO:0008135~translation factor activity, nucleic acid binding	6	4.05405	0.00388777	781923, 793126, 775824, 821677, 799635, 796244	139	98	12983	5.71854	0.763375	0.0812867	5.22986
INTERPRO	IPR004161:Translation elongation factor EFTu/EF1A, domain 2	3	2.02703	0.00733457	793126, 821677, 799635	146	15	16659	22.8205	0.952181	0.163763	9.80154
SP_PIR_KEYWORDS	nucleotide binding	5	3.37838	0.00920368	793126, 814242, 799635, 772317, 820161	148	107	19235	6.07319	0.939289	0.06605	11.6396
INTERPRO	IPR000795:Protein synthesis factor, GTP-binding	3	2.02703	0.00939257	793126, 821677, 799635	146	17	16659	20.1358	0.979707	0.194688	12.3869
SP_PIR_KEYWORDS	P-loop	5	3.37838	0.0121181	793126, 814242, 799635, 772317, 820161	148	116	19235	5.60199	0.975133	0.0788142	15.0554
SP_PIR_KEYWORDS	GTP binding	4	2.7027	0.0146689	793126, 821677, 814242, 799635	148	67	19235	7.75918	0.988639	0.0908706	17.9443
GOTERM_MF_FAT	GO:0003924~GTPase activity	4	2.7027	0.389586	793126, 821677, 814242, 799635	139	211	12983	1.77067	1	0.903819	99.8894
UP_SEQ_FEATURE	nucleotide phosphate-binding region:GTP	4	2.7027	0.396507	793126, 821677, 814242, 799635	148	295	19113	1.75108	1	0.999943	99.9505
SP_PIR_KEYWORDS	gtp-binding	4	2.7027	0.461482	793126, 821677, 814242, 799635	148	329	19235	1.58014	1	0.904077	99.9747
GOTERM_MF_FAT	GO:0005525~GTP binding	5	3.37838	0.561246	793126, 821677, 782125, 814242, 799635	139	372	12983	1.25542	1	0.97345	99.9988
GOTERM_MF_FAT	GO:0019001~guanyl nucleotide binding	5	3.37838	0.582363	793126, 821677, 782125, 814242, 799635	139	382	12983	1.22255	1	0.977646	99.9994
GOTERM_MF_FAT	GO:0032561~guanyl ribonucleotide binding	5	3.37838	0.582363	793126, 821677, 782125, 814242, 799635	139	382	12983	1.22255	1	0.977646	99.9994
Annotation Cluster 22	Enrichment Score: 1.715130391929895
Category	Term	Count	%	PValue	Genes	List Total	Pop Hits	Pop Total	Fold Enrichment	Bonferroni	Benjamini	FDR
SP_PIR_KEYWORDS	mitochondrion	21	14.1892	5.50431e-06	796931, 774195, 787383, 812540, 793882, 787596, 799635, 818987, 820161, 803359, 783770, 813015, 822387, 823629, 807457, 824963, 821792, 795261, 777438, 791792, 788119	148	832	19235	3.2804	0.00166642	0.000119122	0.00736633
GOTERM_CC_FAT	GO:0044429~mitochondrial part	20	13.5135	1.22969e-05	796931, 774195, 787383, 812540, 793882, 787596, 795388, 799635, 818987, 820161, 803359, 783770, 813015, 823629, 807457, 824963, 821792, 777438, 791792, 788119	134	595	12782	3.20632	0.00330243	0.000206722	0.0161577
GOTERM_CC_FAT	GO:0005739~mitochondrion	27	18.2432	4.63014e-05	796931, 774195, 787383, 812540, 818987, 820161, 803359, 783500, 813015, 823629, 807457, 821792, 795261, 777438, 788119, 795388, 787596, 793882, 799635, 791999, 775955, 783770, 819709, 822387, 824963, 791792, 799188	134	1087	12782	2.36934	0.0123781	0.000592937	0.0608256
GOTERM_CC_FAT	GO:0031967~organelle envelope	19	12.8378	7.39911e-05	787383, 812540, 793882, 818987, 790788, 788149, 820161, 803359, 795963, 783770, 813015, 823629, 807457, 824963, 823660, 821792, 783835, 777438, 788119	134	620	12782	2.92318	0.0197076	0.000904334	0.0971849
SP_PIR_KEYWORDS	transit peptide	14	9.45946	7.59291e-05	796931, 774195, 787383, 812540, 787596, 799635, 818987, 820161, 803359, 813015, 822387, 824963, 821792, 788119	148	476	19235	3.82254	0.0227447	0.00114971	0.10157
GOTERM_CC_FAT	GO:0031975~envelope	19	12.8378	7.71029e-05	787383, 812540, 793882, 818987, 790788, 788149, 820161, 803359, 795963, 783770, 813015, 823629, 807457, 824963, 823660, 821792, 783835, 777438, 788119	134	622	12782	2.91378	0.0205279	0.000901397	0.10127
GOTERM_CC_FAT	GO:0005743~mitochondrial inner membrane	13	8.78378	8.25964e-05	787383, 812540, 793882, 818987, 803359, 820161, 813015, 783770, 823629, 807457, 824963, 821792, 788119	134	306	12782	4.05243	0.0219743	0.000925378	0.108482
SP_PIR_KEYWORDS	mitochondrion inner membrane	9	6.08108	0.000120578	813015, 783770, 787383, 823629, 793882, 818987, 820161, 788119, 803359	148	193	19235	6.0606	0.035878	0.00165941	0.161253
GOTERM_CC_FAT	GO:0005759~mitochondrial matrix	11	7.43243	0.000128498	796931, 774195, 812540, 795388, 824963, 787596, 821792, 791792, 799635, 818987, 820161	134	227	12782	4.62233	0.0339775	0.00138177	0.168722
GOTERM_CC_FAT	GO:0031980~mitochondrial lumen	11	7.43243	0.000128498	796931, 774195, 812540, 795388, 824963, 787596, 821792, 791792, 799635, 818987, 820161	134	227	12782	4.62233	0.0339775	0.00138177	0.168722
GOTERM_CC_FAT	GO:0019866~organelle inner membrane	13	8.78378	0.000163459	787383, 812540, 793882, 818987, 803359, 820161, 813015, 783770, 823629, 807457, 824963, 821792, 788119	134	329	12782	3.76913	0.0430213	0.00162735	0.214582
GOTERM_CC_FAT	GO:0031966~mitochondrial membrane	14	9.45946	0.000233557	787383, 812540, 793882, 818987, 803359, 820161, 813015, 783770, 823629, 807457, 824963, 821792, 777438, 788119	134	394	12782	3.38942	0.0609009	0.00202486	0.306473
UP_SEQ_FEATURE	transit peptide:Mitochondrion	13	8.78378	0.000268165	796931, 787383, 812540, 787596, 799635, 818987, 803359, 820161, 813015, 822387, 824963, 821792, 788119	148	467	19113	3.59496	0.170281	0.0366453	0.403338
GOTERM_CC_FAT	GO:0005740~mitochondrial envelope	14	9.45946	0.000421952	787383, 812540, 793882, 818987, 803359, 820161, 813015, 783770, 823629, 807457, 824963, 821792, 777438, 788119	134	419	12782	3.18719	0.107322	0.0035415	0.553051
GOTERM_BP_FAT	GO:0009259~ribonucleotide metabolic process	7	4.72973	0.00354317	787383, 782125, 793981, 802330, 818987, 792407, 820161	136	147	13528	4.73669	0.990737	0.115916	5.64048
GOTERM_CC_FAT	GO:0031090~organelle membrane	22	14.8649	0.00449138	788455, 815675, 787383, 812540, 793882, 790788, 818987, 798427, 820161, 803359, 795963, 805919, 783770, 783500, 813015, 823629, 807457, 824963, 821792, 777438, 788119, 804644	134	1096	12782	1.91472	0.702072	0.0234635	5.74368
KEGG_PATHWAY	hsa05010:Alzheimer's disease	9	6.08108	0.0051618	813015, 787383, 807457, 826073, 801768, 818987, 820161, 788119, 803359	85	163	5085	3.30314	0.372345	0.109918	5.47439
GOTERM_BP_FAT	GO:0009260~ribonucleotide biosynthetic process	6	4.05405	0.00802863	787383, 782125, 793981, 818987, 792407, 820161	136	124	13528	4.81309	0.999976	0.191561	12.353
GOTERM_CC_FAT	GO:0044455~mitochondrial membrane part	6	4.05405	0.00981573	787383, 823629, 818987, 820161, 788119, 803359	134	125	12782	4.57863	0.929594	0.0447188	12.1572
GOTERM_MF_FAT	GO:0046933~hydrogen ion transporting ATP synthase activity, rotational mechanism	3	2.02703	0.0122089	787383, 818987, 820161	139	16	12983	17.513	0.989381	0.212756	15.5824
GOTERM_MF_FAT	GO:0015078~hydrogen ion transmembrane transporter activity	5	3.37838	0.015447	813015, 787383, 818987, 820161, 803359	139	90	12983	5.18905	0.996849	0.230349	19.3194
GOTERM_CC_FAT	GO:0005753~mitochondrial proton-transporting ATP synthase complex	3	2.02703	0.0163667	787383, 818987, 820161	134	19	12782	15.0613	0.988193	0.0680363	19.4947
GOTERM_BP_FAT	GO:0009206~purine ribonucleoside triphosphate biosynthetic process	5	3.37838	0.0166545	787383, 782125, 818987, 792407, 820161	136	98	13528	5.07503	1	0.308717	24.0207
GOTERM_BP_FAT	GO:0009201~ribonucleoside triphosphate biosynthetic process	5	3.37838	0.017225	787383, 782125, 818987, 792407, 820161	136	99	13528	5.02377	1	0.313192	24.7385
GOTERM_BP_FAT	GO:0009145~purine nucleoside triphosphate biosynthetic process	5	3.37838	0.017225	787383, 782125, 818987, 792407, 820161	136	99	13528	5.02377	1	0.313192	24.7385
KEGG_PATHWAY	hsa05012:Parkinson's disease	7	4.72973	0.0185486	813015, 787383, 823629, 818987, 820161, 788119, 803359	85	128	5085	3.2716	0.814566	0.244853	18.4277
GOTERM_BP_FAT	GO:0009142~nucleoside triphosphate biosynthetic process	5	3.37838	0.0190093	787383, 782125, 818987, 792407, 820161	136	102	13528	4.87601	1	0.330898	26.9426
GOTERM_CC_FAT	GO:0045259~proton-transporting ATP synthase complex	3	2.02703	0.0198296	787383, 818987, 820161	134	21	12782	13.6269	0.995428	0.0795462	23.1404
GOTERM_MF_FAT	GO:0046961~proton-transporting ATPase activity, rotational mechanism	3	2.02703	0.0245252	787383, 818987, 820161	139	23	12983	12.183	0.999898	0.279726	28.9945
GOTERM_MF_FAT	GO:0015077~monovalent inorganic cation transmembrane transporter activity	5	3.37838	0.0248348	813015, 787383, 818987, 820161, 803359	139	104	12983	4.49052	0.999909	0.274475	29.3046
KEGG_PATHWAY	hsa05016:Huntington's disease	8	5.40541	0.0283709	813015, 783500, 787383, 823629, 818987, 820161, 788119, 803359	85	180	5085	2.65882	0.925002	0.250097	26.8825
GOTERM_BP_FAT	GO:0009205~purine ribonucleoside triphosphate metabolic process	5	3.37838	0.0296191	787383, 782125, 818987, 792407, 820161	136	117	13528	4.25088	1	0.402522	38.8472
GOTERM_BP_FAT	GO:0009152~purine ribonucleotide biosynthetic process	5	3.37838	0.0296191	787383, 782125, 818987, 792407, 820161	136	117	13528	4.25088	1	0.402522	38.8472
GOTERM_BP_FAT	GO:0009199~ribonucleoside triphosphate metabolic process	5	3.37838	0.0304289	787383, 782125, 818987, 792407, 820161	136	118	13528	4.21486	1	0.403059	39.6766
GOTERM_BP_FAT	GO:0009144~purine nucleoside triphosphate metabolic process	5	3.37838	0.0337983	787383, 782125, 818987, 792407, 820161	136	122	13528	4.07666	1	0.409824	43.0156
GOTERM_BP_FAT	GO:0009165~nucleotide biosynthetic process	6	4.05405	0.0386412	787383, 782125, 793981, 818987, 792407, 820161	136	186	13528	3.20873	1	0.435149	47.5119
KEGG_PATHWAY	hsa04260:Cardiac muscle contraction	5	3.37838	0.0392712	813015, 811889, 782130, 788119, 803359	85	78	5085	3.83484	0.972831	0.30272	35.3276
GOTERM_BP_FAT	GO:0009141~nucleoside triphosphate metabolic process	5	3.37838	0.0421467	787383, 782125, 818987, 792407, 820161	136	131	13528	3.79659	1	0.45704	50.5563
GOTERM_BP_FAT	GO:0034404~nucleobase, nucleoside and nucleotide biosynthetic process	6	4.05405	0.0441202	787383, 782125, 793981, 818987, 792407, 820161	136	193	13528	3.09235	1	0.462041	52.1965
GOTERM_BP_FAT	GO:0034654~nucleobase, nucleoside, nucleotide and nucleic acid biosynthetic process	6	4.05405	0.0441202	787383, 782125, 793981, 818987, 792407, 820161	136	193	13528	3.09235	1	0.462041	52.1965
GOTERM_BP_FAT	GO:0009150~purine ribonucleotide metabolic process	5	3.37838	0.0494234	787383, 782125, 818987, 792407, 820161	136	138	13528	3.60401	1	0.477475	56.3546
SP_PIR_KEYWORDS	Hydrogen ion transport	3	2.02703	0.0520625	787383, 818987, 820161	148	48	19235	8.12289	1	0.259188	51.1082
GOTERM_MF_FAT	GO:0019829~cation-transporting ATPase activity	3	2.02703	0.0558678	787383, 818987, 820161	139	36	12983	7.78357	1	0.428655	54.7406
GOTERM_BP_FAT	GO:0006754~ATP biosynthetic process	4	2.7027	0.0594163	787383, 818987, 792407, 820161	136	89	13528	4.47059	1	0.523476	63.2831
GOTERM_BP_FAT	GO:0015985~energy coupled proton transport, down electrochemical gradient	3	2.02703	0.0602754	787383, 818987, 820161	136	40	13528	7.46029	1	0.525482	63.8278
GOTERM_BP_FAT	GO:0015986~ATP synthesis coupled proton transport	3	2.02703	0.0602754	787383, 818987, 820161	136	40	13528	7.46029	1	0.525482	63.8278
GOTERM_BP_FAT	GO:0006164~purine nucleotide biosynthetic process	5	3.37838	0.0608162	787383, 782125, 818987, 792407, 820161	136	148	13528	3.36049	1	0.525541	64.1668
KEGG_PATHWAY	hsa00190:Oxidative phosphorylation	6	4.05405	0.0628637	813015, 787383, 818987, 820161, 788119, 803359	85	130	5085	2.76109	0.997101	0.362048	50.6543
GOTERM_MF_FAT	GO:0016887~ATPase activity	8	5.40541	0.0656406	823976, 787383, 824963, 794878, 809635, 818987, 772317, 820161	139	334	12983	2.23719	1	0.466353	60.7902
GOTERM_MF_FAT	GO:0042623~ATPase activity, coupled	7	4.72973	0.0702076	823976, 787383, 794878, 809635, 818987, 772317, 820161	139	272	12983	2.40375	1	0.473382	63.3519
GOTERM_BP_FAT	GO:0006119~oxidative phosphorylation	4	2.7027	0.0746963	787383, 818987, 820161, 788119	136	98	13528	4.06002	1	0.577045	71.9122
GOTERM_MF_FAT	GO:0022890~inorganic cation transmembrane transporter activity	5	3.37838	0.0773382	813015, 787383, 818987, 820161, 803359	139	151	12983	3.09281	1	0.491794	67.0432
GOTERM_CC_FAT	GO:0016469~proton-transporting two-sector ATPase complex	3	2.02703	0.0796265	787383, 818987, 820161	134	45	12782	6.3592	1	0.254493	66.3901
GOTERM_BP_FAT	GO:0034220~ion transmembrane transport	3	2.02703	0.0858238	787383, 818987, 820161	136	49	13528	6.09004	1	0.606211	76.9552
GOTERM_BP_FAT	GO:0046034~ATP metabolic process	4	2.7027	0.0876611	787383, 818987, 792407, 820161	136	105	13528	3.78936	1	0.611472	77.7012
SP_PIR_KEYWORDS	respiratory chain	3	2.02703	0.102559	813015, 788119, 803359	148	71	19235	5.49153	1	0.426337	76.5003
GOTERM_BP_FAT	GO:0044271~nitrogen compound biosynthetic process	7	4.72973	0.106857	787383, 782125, 793981, 793882, 818987, 792407, 820161	136	325	13528	2.14244	1	0.6658	84.2521
GOTERM_BP_FAT	GO:0006163~purine nucleotide metabolic process	5	3.37838	0.115603	787383, 782125, 818987, 792407, 820161	136	186	13528	2.67394	1	0.683113	86.5935
GOTERM_BP_FAT	GO:0015992~proton transport	3	2.02703	0.123829	787383, 818987, 820161	136	61	13528	4.892	1	0.707098	88.4938
GOTERM_BP_FAT	GO:0006818~hydrogen transport	3	2.02703	0.130508	787383, 818987, 820161	136	63	13528	4.73669	1	0.722227	89.8474
GOTERM_MF_FAT	GO:0042625~ATPase activity, coupled to transmembrane movement of ions	3	2.02703	0.185742	787383, 818987, 820161	139	74	12983	3.7866	1	0.77479	94.1192
GOTERM_MF_FAT	GO:0042626~ATPase activity, coupled to transmembrane movement of substances	3	2.02703	0.322891	787383, 818987, 820161	139	109	12983	2.57072	1	0.865174	99.5378
GOTERM_MF_FAT	GO:0043492~ATPase activity, coupled to movement of substances	3	2.02703	0.326792	787383, 818987, 820161	139	110	12983	2.54735	1	0.865422	99.5732
GOTERM_MF_FAT	GO:0016820~hydrolase activity, acting on acid anhydrides, catalyzing transmembrane movement of substances	3	2.02703	0.330688	787383, 818987, 820161	139	111	12983	2.5244	1	0.865679	99.606
GOTERM_MF_FAT	GO:0015399~primary active transmembrane transporter activity	3	2.02703	0.373075	787383, 818987, 820161	139	122	12983	2.29679	1	0.897018	99.8402
GOTERM_MF_FAT	GO:0015405~P-P-bond-hydrolysis-driven transmembrane transporter activity	3	2.02703	0.373075	787383, 818987, 820161	139	122	12983	2.29679	1	0.897018	99.8402
GOTERM_BP_FAT	GO:0016310~phosphorylation	10	6.75676	0.404971	797595, 802976, 787383, 794115, 782125, 794360, 817654, 818987, 820161, 788119	136	800	13528	1.24338	1	0.957385	99.9795
GOTERM_BP_FAT	GO:0006796~phosphate metabolic process	10	6.75676	0.642227	797595, 802976, 787383, 794115, 782125, 794360, 817654, 818987, 820161, 788119	136	973	13528	1.02231	1	0.995392	100
GOTERM_BP_FAT	GO:0006793~phosphorus metabolic process	10	6.75676	0.642227	797595, 802976, 787383, 794115, 782125, 794360, 817654, 818987, 820161, 788119	136	973	13528	1.02231	1	0.995392	100
SP_PIR_KEYWORDS	ion transport	5	3.37838	0.648239	787383, 822573, 795261, 818987, 820161	148	578	19235	1.12428	1	0.971476	99.9999
GOTERM_BP_FAT	GO:0006812~cation transport	5	3.37838	0.807676	812139, 787383, 795261, 818987, 820161	136	553	13528	0.899372	1	0.999552	100
GOTERM_BP_FAT	GO:0055085~transmembrane transport	5	3.37838	0.825043	787383, 823629, 795261, 818987, 820161	136	569	13528	0.874082	1	0.999686	100
GOTERM_BP_FAT	GO:0015672~monovalent inorganic cation transport	3	2.02703	0.830149	787383, 818987, 820161	136	318	13528	0.938402	1	0.999719	100
GOTERM_BP_FAT	GO:0006811~ion transport	6	4.05405	0.887778	812139, 787383, 822573, 795261, 818987, 820161	136	768	13528	0.777114	1	0.99994	100
GOTERM_BP_FAT	GO:0006468~protein amino acid phosphorylation	4	2.7027	0.96554	802976, 794115, 794360, 817654	136	667	13528	0.596525	1	0.999999	100
Annotation Cluster 23	Enrichment Score: 1.6882803015964398
Category	Term	Count	%	PValue	Genes	List Total	Pop Hits	Pop Total	Fold Enrichment	Bonferroni	Benjamini	FDR
GOTERM_CC_FAT	GO:0031983~vesicle lumen	5	3.37838	0.0013034	788455, 786096, 808953, 817654, 811696	134	46	12782	10.3683	0.295906	0.00812596	1.69926
GOTERM_MF_FAT	GO:0005178~integrin binding	5	3.37838	0.00353824	786096, 784977, 808953, 817654, 803900	139	59	12983	7.9155	0.730576	0.0786975	4.77026
GOTERM_CC_FAT	GO:0031093~platelet alpha granule lumen	4	2.7027	0.00879929	786096, 808953, 817654, 811696	134	41	12782	9.30615	0.907216	0.0415665	10.9649
GOTERM_CC_FAT	GO:0060205~cytoplasmic membrane-bounded vesicle lumen	4	2.7027	0.0106884	786096, 808953, 817654, 811696	134	44	12782	8.67164	0.944461	0.0470357	13.1692
GOTERM_CC_FAT	GO:0031091~platelet alpha granule	4	2.7027	0.0204483	786096, 808953, 817654, 811696	134	56	12782	6.81343	0.996142	0.0807581	23.7755
GOTERM_CC_FAT	GO:0030141~secretory granule	6	4.05405	0.0398651	786096, 808953, 795388, 824963, 817654, 811696	134	180	12782	3.1796	0.999982	0.146661	41.4084
GOTERM_CC_FAT	GO:0044433~cytoplasmic vesicle part	6	4.05405	0.0456956	805919, 783500, 786096, 808953, 817654, 811696	134	187	12782	3.06058	0.999997	0.162395	45.9153
GOTERM_BP_FAT	GO:0051271~negative regulation of cell motion	3	2.02703	0.130508	786096, 808953, 817654	136	63	13528	4.73669	1	0.722227	89.8474
GOTERM_BP_FAT	GO:0051270~regulation of cell motion	4	2.7027	0.303033	799749, 786096, 808953, 817654	136	193	13528	2.06157	1	0.910826	99.7274
Annotation Cluster 24	Enrichment Score: 1.6763876453842317
Category	Term	Count	%	PValue	Genes	List Total	Pop Hits	Pop Total	Fold Enrichment	Bonferroni	Benjamini	FDR
GOTERM_BP_FAT	GO:0009109~coenzyme catabolic process	4	2.7027	0.00213614	796931, 794852, 821792, 784216	136	26	13528	15.3032	0.940429	0.0796106	3.43733
GOTERM_BP_FAT	GO:0051187~cofactor catabolic process	4	2.7027	0.00356132	796931, 794852, 821792, 784216	136	31	13528	12.8349	0.990957	0.113665	5.66859
GOTERM_BP_FAT	GO:0009060~aerobic respiration	4	2.7027	0.00503729	796931, 794852, 821792, 788119	136	35	13528	11.3681	0.99872	0.140484	7.9283
SP_PIR_KEYWORDS	tricarboxylic acid cycle	3	2.02703	0.0110758	796931, 794852, 821792	148	21	19235	18.5666	0.965771	0.0738298	13.848
GOTERM_BP_FAT	GO:0006732~coenzyme metabolic process	6	4.05405	0.0185851	796931, 812048, 813329, 794852, 821792, 784216	136	153	13528	3.90081	1	0.329079	26.4242
GOTERM_BP_FAT	GO:0006099~tricarboxylic acid cycle	3	2.02703	0.0218077	796931, 794852, 821792	136	23	13528	12.9744	1	0.347984	30.2779
GOTERM_BP_FAT	GO:0046356~acetyl-CoA catabolic process	3	2.02703	0.0218077	796931, 794852, 821792	136	23	13528	12.9744	1	0.347984	30.2779
GOTERM_BP_FAT	GO:0006084~acetyl-CoA metabolic process	3	2.02703	0.0380656	796931, 794852, 821792	136	31	13528	9.62619	1	0.433777	46.9955
GOTERM_BP_FAT	GO:0051186~cofactor metabolic process	6	4.05405	0.0457671	796931, 812048, 813329, 794852, 821792, 784216	136	195	13528	3.06063	1	0.464289	53.5261
GOTERM_BP_FAT	GO:0045333~cellular respiration	4	2.7027	0.0729195	796931, 794852, 821792, 788119	136	97	13528	4.10188	1	0.571017	71.0169
KEGG_PATHWAY	hsa00020:Citrate cycle (TCA cycle)	3	2.02703	0.0921545	796931, 794852, 821792	85	31	5085	5.78937	0.999834	0.400609	65.0681
GOTERM_BP_FAT	GO:0015980~energy derivation by oxidation of organic compounds	4	2.7027	0.174062	796931, 794852, 821792, 788119	136	144	13528	2.76307	1	0.793302	95.6195
Annotation Cluster 25	Enrichment Score: 1.571842353572156
Category	Term	Count	%	PValue	Genes	List Total	Pop Hits	Pop Total	Fold Enrichment	Bonferroni	Benjamini	FDR
GOTERM_MF_FAT	GO:0004857~enzyme inhibitor activity	11	7.43243	0.000612222	815675, 775623, 817614, 792814, 818455, 796346, 815903, 823660, 800499, 775480, 811696	139	270	12983	3.8053	0.202754	0.0279266	0.840941
GOTERM_MF_FAT	GO:0004866~endopeptidase inhibitor activity	6	4.05405	0.0192484	815675, 792814, 796346, 800499, 775480, 811696	139	145	12983	3.86495	0.999247	0.249979	23.5107
GOTERM_MF_FAT	GO:0030414~peptidase inhibitor activity	6	4.05405	0.0236457	815675, 792814, 796346, 800499, 775480, 811696	139	153	12983	3.66286	0.999857	0.279584	28.1066
SMART	SM00093:SERPIN	3	2.02703	0.0359133	792814, 796346, 800499	69	40	9079	9.86848	0.903743	0.284226	31.034
INTERPRO	IPR000215:Protease inhibitor I4, serpin	3	2.02703	0.0473189	792814, 796346, 800499	146	40	16659	8.55771	1	0.536991	49.3018
PIR_SUPERFAMILY	PIRSF001630:serpin	3	2.02703	0.0819382	792814, 796346, 800499	108	33	7396	6.22559	0.999936	0.910642	62.1177
GOTERM_MF_FAT	GO:0004867~serine-type endopeptidase inhibitor activity	3	2.02703	0.256018	792814, 796346, 800499	139	92	12983	3.04575	1	0.838576	98.3061
Annotation Cluster 26	Enrichment Score: 1.5144523116041033
Category	Term	Count	%	PValue	Genes	List Total	Pop Hits	Pop Total	Fold Enrichment	Bonferroni	Benjamini	FDR
GOTERM_BP_FAT	GO:0030155~regulation of cell adhesion	6	4.05405	0.0120296	814144, 791118, 817654, 803900, 791781, 820161	136	137	13528	4.35638	1	0.264338	17.9596
GOTERM_BP_FAT	GO:0001666~response to hypoxia	5	3.37838	0.0451665	814144, 786096, 817654, 791781, 804644	136	134	13528	3.71159	1	0.463163	53.0453
GOTERM_BP_FAT	GO:0070482~response to oxygen levels	5	3.37838	0.0526717	814144, 786096, 817654, 791781, 804644	136	141	13528	3.52733	1	0.493241	58.7312
Annotation Cluster 27	Enrichment Score: 1.509509731606329
Category	Term	Count	%	PValue	Genes	List Total	Pop Hits	Pop Total	Fold Enrichment	Bonferroni	Benjamini	FDR
GOTERM_MF_FAT	GO:0005178~integrin binding	5	3.37838	0.00353824	786096, 784977, 808953, 817654, 803900	139	59	12983	7.9155	0.730576	0.0786975	4.77026
KEGG_PATHWAY	hsa04510:Focal adhesion	10	6.75676	0.00554924	822836, 805802, 789529, 786096, 825519, 784977, 794587, 808953, 817654, 804645	85	201	5085	2.97629	0.393968	0.0953114	5.8741
KEGG_PATHWAY	hsa04670:Leukocyte transendothelial migration	5	3.37838	0.130072	799778, 786096, 825519, 784977, 808953	85	118	5085	2.5349	0.999996	0.465835	78.0388
KEGG_PATHWAY	hsa05412:Arrhythmogenic right ventricular cardiomyopathy (ARVC)	3	2.02703	0.358722	786096, 784977, 808953	85	76	5085	2.36146	1	0.772583	99.204
Annotation Cluster 28	Enrichment Score: 1.4991378284089614
Category	Term	Count	%	PValue	Genes	List Total	Pop Hits	Pop Total	Fold Enrichment	Bonferroni	Benjamini	FDR
GOTERM_CC_FAT	GO:0030864~cortical actin cytoskeleton	5	3.37838	0.000188983	802976, 794115, 822573, 805574, 825820	134	28	12782	17.0336	0.0495705	0.00181411	0.24805
GOTERM_BP_FAT	GO:0008064~regulation of actin polymerization or depolymerization	5	3.37838	0.00318852	822491, 802976, 815528, 794115, 825820	136	61	13528	8.15333	0.985189	0.107606	5.08965
GOTERM_BP_FAT	GO:0030832~regulation of actin filament length	5	3.37838	0.00358421	822491, 802976, 815528, 794115, 825820	136	63	13528	7.89449	0.991227	0.111661	5.70404
GOTERM_BP_FAT	GO:0032956~regulation of actin cytoskeleton organization	5	3.37838	0.0120515	822491, 802976, 815528, 794115, 825820	136	89	13528	5.58824	1	0.260473	17.9894
GOTERM_BP_FAT	GO:0032970~regulation of actin filament-based process	5	3.37838	0.0134813	822491, 802976, 815528, 794115, 825820	136	92	13528	5.40601	1	0.269543	19.9094
GOTERM_BP_FAT	GO:0051129~negative regulation of cellular component organization	6	4.05405	0.0138749	822491, 802976, 815528, 791118, 817654, 791781	136	142	13528	4.20298	1	0.27221	20.4304
GOTERM_BP_FAT	GO:0030834~regulation of actin filament depolymerization	3	2.02703	0.0294831	802976, 794115, 825820	136	27	13528	11.0523	1	0.405112	38.7069
GOTERM_BP_FAT	GO:0030837~negative regulation of actin filament polymerization	3	2.02703	0.031547	822491, 802976, 815528	136	28	13528	10.6576	1	0.40666	40.8045
GOTERM_BP_FAT	GO:0032272~negative regulation of protein polymerization	3	2.02703	0.0336662	822491, 802976, 815528	136	29	13528	10.2901	1	0.412228	42.888
GOTERM_BP_FAT	GO:0031333~negative regulation of protein complex assembly	3	2.02703	0.0450481	822491, 802976, 815528	136	34	13528	8.77682	1	0.465695	52.95
GOTERM_BP_FAT	GO:0051493~regulation of cytoskeleton organization	5	3.37838	0.0472246	822491, 802976, 815528, 794115, 825820	136	136	13528	3.65701	1	0.471695	54.6736
GOTERM_BP_FAT	GO:0044087~regulation of cellular component biogenesis	5	3.37838	0.0537962	822491, 802976, 815528, 817654, 791781	136	142	13528	3.50249	1	0.497463	59.5252
GOTERM_BP_FAT	GO:0032535~regulation of cellular component size	7	4.72973	0.0542944	822491, 802976, 815528, 794115, 783039, 825820, 812449	136	271	13528	2.56935	1	0.497494	59.8723
GOTERM_BP_FAT	GO:0043244~regulation of protein complex disassembly	3	2.02703	0.0918788	802976, 794115, 825820	136	51	13528	5.85121	1	0.626725	79.3289
GOTERM_BP_FAT	GO:0030833~regulation of actin filament polymerization	3	2.02703	0.101186	822491, 802976, 815528	136	54	13528	5.52614	1	0.650087	82.5343
GOTERM_BP_FAT	GO:0051494~negative regulation of cytoskeleton organization	3	2.02703	0.104345	822491, 802976, 815528	136	55	13528	5.42567	1	0.659278	83.5117
GOTERM_BP_FAT	GO:0032271~regulation of protein polymerization	3	2.02703	0.147549	822491, 802976, 815528	136	68	13528	4.38841	1	0.752034	92.6553
GOTERM_BP_FAT	GO:0033043~regulation of organelle organization	5	3.37838	0.171755	822491, 802976, 815528, 794115, 825820	136	217	13528	2.29195	1	0.790551	95.415
GOTERM_BP_FAT	GO:0010639~negative regulation of organelle organization	3	2.02703	0.197255	822491, 802976, 815528	136	82	13528	3.63917	1	0.829177	97.2509
GOTERM_BP_FAT	GO:0043254~regulation of protein complex assembly	3	2.02703	0.226506	822491, 802976, 815528	136	90	13528	3.31569	1	0.854099	98.502
Annotation Cluster 29	Enrichment Score: 1.478171867754515
Category	Term	Count	%	PValue	Genes	List Total	Pop Hits	Pop Total	Fold Enrichment	Bonferroni	Benjamini	FDR
GOTERM_CC_FAT	GO:0043233~organelle lumen	31	20.9459	0.00625328	796931, 802976, 799749, 774195, 812540, 808953, 809635, 800499, 818987, 820161, 784769, 786096, 794115, 823660, 821792, 791411, 799778, 788455, 815675, 797325, 782629, 795388, 787596, 799635, 791264, 783770, 824963, 791792, 817654, 811696, 804644	134	1820	12782	1.62474	0.815002	0.0313365	7.91238
GOTERM_CC_FAT	GO:0031974~membrane-enclosed lumen	31	20.9459	0.00824345	796931, 802976, 799749, 774195, 812540, 808953, 809635, 800499, 818987, 820161, 784769, 786096, 794115, 823660, 821792, 791411, 799778, 788455, 815675, 797325, 782629, 795388, 787596, 799635, 791264, 783770, 824963, 791792, 817654, 811696, 804644	134	1856	12782	1.59323	0.892114	0.0396765	10.3066
GOTERM_CC_FAT	GO:0070013~intracellular organelle lumen	28	18.9189	0.026326	796931, 802976, 799749, 774195, 812540, 808953, 809635, 800499, 818987, 820161, 784769, 786096, 794115, 823660, 821792, 791411, 799778, 815675, 797325, 782629, 795388, 787596, 799635, 791264, 783770, 824963, 791792, 804644	134	1779	12782	1.50133	0.999236	0.10016	29.5716
GOTERM_CC_FAT	GO:0031981~nuclear lumen	12	8.10811	0.90097	799778, 802976, 791264, 799749, 783770, 786096, 794115, 808953, 797325, 823660, 809635, 791411	134	1450	12782	0.789418	1	0.996127	100
Annotation Cluster 30	Enrichment Score: 1.43248328177448
Category	Term	Count	%	PValue	Genes	List Total	Pop Hits	Pop Total	Fold Enrichment	Bonferroni	Benjamini	FDR
SP_PIR_KEYWORDS	calcium	15	10.1351	0.00343253	783393, 808953, 817614, 782629, 788149, 812139, 825519, 786096, 811889, 818455, 826073, 817654, 791781, 806127, 804644	148	803	19235	2.42776	0.647197	0.0285254	4.49749
INTERPRO	IPR018248:EF hand	6	4.05405	0.00559236	783393, 786096, 825519, 808953, 782629, 788149	146	130	16659	5.26628	0.901345	0.152477	7.5577
SP_PIR_KEYWORDS	EF hand	4	2.7027	0.0108907	783393, 808953, 782629, 788149	148	60	19235	8.66441	0.963774	0.0742602	13.632
UP_SEQ_FEATURE	domain:EF-hand 2	6	4.05405	0.013339	783393, 786096, 825519, 808953, 782629, 788149	148	182	19113	4.25743	0.999913	0.405032	18.3199
UP_SEQ_FEATURE	domain:EF-hand 1	6	4.05405	0.013339	783393, 786096, 825519, 808953, 782629, 788149	148	182	19113	4.25743	0.999913	0.405032	18.3199
INTERPRO	IPR018249:EF-HAND 2	6	4.05405	0.0399831	783393, 786096, 825519, 808953, 782629, 788149	146	215	16659	3.18426	1	0.504494	43.5486
INTERPRO	IPR018247:EF-HAND 1	6	4.05405	0.0413341	783393, 786096, 825519, 808953, 782629, 788149	146	217	16659	3.15491	1	0.502099	44.6517
INTERPRO	IPR011992:EF-Hand type	6	4.05405	0.0555452	783393, 786096, 825519, 808953, 782629, 788149	146	236	16659	2.90092	1	0.582781	55.1033
SMART	SM00054:EFh	4	2.7027	0.0916661	786096, 825519, 808953, 782629	69	143	9079	3.68055	0.997873	0.536591	62.3456
INTERPRO	IPR002048:Calcium-binding EF-hand	4	2.7027	0.128915	786096, 825519, 808953, 782629	146	143	16659	3.19169	1	0.869414	85.5432
KEGG_PATHWAY	hsa04670:Leukocyte transendothelial migration	5	3.37838	0.130072	799778, 786096, 825519, 784977, 808953	85	118	5085	2.5349	0.999996	0.465835	78.0388
KEGG_PATHWAY	hsa04530:Tight junction	5	3.37838	0.179866	786096, 825519, 823922, 808953, 794878	85	134	5085	2.23222	1	0.539713	88.4341
UP_SEQ_FEATURE	calcium-binding region:1	3	2.02703	0.252773	786096, 782629, 788149	148	126	19113	3.07481	1	0.998232	98.7611
Annotation Cluster 31	Enrichment Score: 1.4114631829635873
Category	Term	Count	%	PValue	Genes	List Total	Pop Hits	Pop Total	Fold Enrichment	Bonferroni	Benjamini	FDR
GOTERM_BP_FAT	GO:0009259~ribonucleotide metabolic process	7	4.72973	0.00354317	787383, 782125, 793981, 802330, 818987, 792407, 820161	136	147	13528	4.73669	0.990737	0.115916	5.64048
GOTERM_BP_FAT	GO:0009261~ribonucleotide catabolic process	3	2.02703	0.0255267	787383, 802330, 820161	136	25	13528	11.9365	1	0.373256	34.4894
GOTERM_BP_FAT	GO:0044270~nitrogen compound catabolic process	4	2.7027	0.0292944	787383, 802330, 784216, 820161	136	67	13528	5.93854	1	0.407194	38.5117
GOTERM_BP_FAT	GO:0046700~heterocycle catabolic process	4	2.7027	0.0416612	787383, 802330, 784216, 820161	136	77	13528	5.1673	1	0.4567	50.1448
GOTERM_BP_FAT	GO:0009166~nucleotide catabolic process	3	2.02703	0.0918788	787383, 802330, 820161	136	51	13528	5.85121	1	0.626725	79.3289
GOTERM_BP_FAT	GO:0034656~nucleobase, nucleoside and nucleotide catabolic process	3	2.02703	0.113978	787383, 802330, 820161	136	58	13528	5.14503	1	0.680218	86.1847
GOTERM_BP_FAT	GO:0034655~nucleobase, nucleoside, nucleotide and nucleic acid catabolic process	3	2.02703	0.113978	787383, 802330, 820161	136	58	13528	5.14503	1	0.680218	86.1847
Annotation Cluster 32	Enrichment Score: 1.3257979164661573
Category	Term	Count	%	PValue	Genes	List Total	Pop Hits	Pop Total	Fold Enrichment	Bonferroni	Benjamini	FDR
SP_PIR_KEYWORDS	proteinase	6	4.05405	1.39929e-07	814144, 822964, 784081, 785147, 775955, 788119	148	17	19235	45.8704	4.23975e-05	4.23983e-06	0.000187271
SP_PIR_KEYWORDS	threonine protease	4	2.7027	0.000453179	822964, 784081, 785147, 775955	148	20	19235	25.9932	0.12833	0.00547871	0.604804
INTERPRO	IPR001353:Proteasome, subunit alpha/beta	4	2.7027	0.000565038	822964, 784081, 785147, 775955	146	19	16659	24.0216	0.208184	0.0456123	0.788881
GOTERM_CC_FAT	GO:0005839~proteasome core complex	4	2.7027	0.00110298	822964, 784081, 785147, 775955	134	20	12782	19.0776	0.256856	0.00739416	1.43971
GOTERM_MF_FAT	GO:0004298~threonine-type endopeptidase activity	4	2.7027	0.00117333	822964, 784081, 785147, 775955	139	20	12983	18.6806	0.352338	0.0471189	1.6059
GOTERM_MF_FAT	GO:0070003~threonine-type peptidase activity	4	2.7027	0.00117333	822964, 784081, 785147, 775955	139	20	12983	18.6806	0.352338	0.0471189	1.6059
GOTERM_BP_FAT	GO:0032269~negative regulation of cellular protein metabolic process	8	5.40541	0.0021793	822964, 784081, 797325, 775480, 817654, 785147, 775955, 811696	136	180	13528	4.42092	0.943733	0.0789291	3.50562
GOTERM_BP_FAT	GO:0051248~negative regulation of protein metabolic process	8	5.40541	0.00269995	822964, 784081, 797325, 775480, 817654, 785147, 775955, 811696	136	187	13528	4.25543	0.971733	0.0943089	4.32589
SP_PIR_KEYWORDS	proteasome	4	2.7027	0.0090191	822964, 784081, 785147, 775955	148	56	19235	9.2833	0.935764	0.0663276	11.419
GOTERM_MF_FAT	GO:0004175~endopeptidase activity	10	6.75676	0.0186605	775626, 814144, 822964, 783039, 784081, 796346, 785147, 791781, 775955, 788119	139	375	12983	2.49074	0.99906	0.261421	22.8759
GOTERM_BP_FAT	GO:0010498~proteasomal protein catabolic process	5	3.37838	0.0190093	822964, 784081, 785147, 775955, 804644	136	102	13528	4.87601	1	0.330898	26.9426
GOTERM_BP_FAT	GO:0043161~proteasomal ubiquitin-dependent protein catabolic process	5	3.37838	0.0190093	822964, 784081, 785147, 775955, 804644	136	102	13528	4.87601	1	0.330898	26.9426
GOTERM_BP_FAT	GO:0045861~negative regulation of proteolysis	3	2.02703	0.0200407	775480, 817654, 811696	136	22	13528	13.5642	1	0.336882	28.189
GOTERM_CC_FAT	GO:0000502~proteasome complex	4	2.7027	0.0255772	822964, 784081, 785147, 775955	134	61	12782	6.25495	0.99906	0.0987986	28.8565
GOTERM_BP_FAT	GO:0051436~negative regulation of ubiquitin-protein ligase activity during mitotic cell cycle	4	2.7027	0.0270946	822964, 784081, 785147, 775955	136	65	13528	6.12127	1	0.387133	36.1924
GOTERM_BP_FAT	GO:0031145~anaphase-promoting complex-dependent proteasomal ubiquitin-dependent protein catabolic process	4	2.7027	0.0270946	822964, 784081, 785147, 775955	136	65	13528	6.12127	1	0.387133	36.1924
GOTERM_BP_FAT	GO:0051444~negative regulation of ubiquitin-protein ligase activity	4	2.7027	0.0292944	822964, 784081, 785147, 775955	136	67	13528	5.93854	1	0.407194	38.5117
GOTERM_BP_FAT	GO:0051352~negative regulation of ligase activity	4	2.7027	0.0292944	822964, 784081, 785147, 775955	136	67	13528	5.93854	1	0.407194	38.5117
GOTERM_BP_FAT	GO:0051437~positive regulation of ubiquitin-protein ligase activity during mitotic cell cycle	4	2.7027	0.0304288	822964, 784081, 785147, 775955	136	68	13528	5.85121	1	0.406994	39.6765
GOTERM_BP_FAT	GO:0031400~negative regulation of protein modification process	5	3.37838	0.0312517	822964, 784081, 797325, 785147, 775955	136	119	13528	4.17944	1	0.407548	40.5085
GOTERM_BP_FAT	GO:0044093~positive regulation of molecular function	12	8.10811	0.0325556	786096, 822964, 805574, 784081, 782125, 797325, 824963, 826073, 791792, 817654, 785147, 775955	136	586	13528	2.03694	1	0.409018	41.8049
GOTERM_BP_FAT	GO:0051443~positive regulation of ubiquitin-protein ligase activity	4	2.7027	0.0327662	822964, 784081, 785147, 775955	136	70	13528	5.68403	1	0.407335	42.0117
GOTERM_BP_FAT	GO:0051439~regulation of ubiquitin-protein ligase activity during mitotic cell cycle	4	2.7027	0.0339691	822964, 784081, 785147, 775955	136	71	13528	5.60398	1	0.407825	43.1802
GOTERM_BP_FAT	GO:0051351~positive regulation of ligase activity	4	2.7027	0.0364431	822964, 784081, 785147, 775955	136	73	13528	5.45044	1	0.42675	45.5141
GOTERM_BP_FAT	GO:0031397~negative regulation of protein ubiquitination	4	2.7027	0.037714	822964, 784081, 785147, 775955	136	74	13528	5.37679	1	0.434329	46.6777
KEGG_PATHWAY	hsa03050:Proteasome	4	2.7027	0.041888	822964, 784081, 785147, 775955	85	47	5085	5.09136	0.978745	0.295386	37.2184
GOTERM_BP_FAT	GO:0051438~regulation of ubiquitin-protein ligase activity	4	2.7027	0.0430214	822964, 784081, 785147, 775955	136	78	13528	5.10106	1	0.456947	51.2898
GOTERM_BP_FAT	GO:0051340~regulation of ligase activity	4	2.7027	0.0472344	822964, 784081, 785147, 775955	136	81	13528	4.91213	1	0.468417	54.6812
GOTERM_BP_FAT	GO:0032268~regulation of cellular protein metabolic process	10	6.75676	0.0478418	822964, 775824, 784081, 797325, 794852, 775480, 817654, 785147, 775955, 811696	136	474	13528	2.09854	1	0.469507	55.1515
GOTERM_BP_FAT	GO:0031398~positive regulation of protein ubiquitination	4	2.7027	0.051643	822964, 784081, 785147, 775955	136	84	13528	4.73669	1	0.489564	57.992
GOTERM_BP_FAT	GO:0010605~negative regulation of macromolecule metabolic process	13	8.78378	0.0629655	783393, 797325, 775480, 775955, 820893, 783770, 822964, 783039, 784081, 793142, 817654, 785147, 811696	136	734	13528	1.76174	1	0.531925	65.4848
GOTERM_MF_FAT	GO:0070011~peptidase activity, acting on L-amino acid peptides	11	7.43243	0.067705	788455, 775626, 814144, 822964, 783039, 784081, 796346, 785147, 791781, 775955, 788119	139	549	12983	1.87146	1	0.468825	61.968
GOTERM_BP_FAT	GO:0043085~positive regulation of catalytic activity	10	6.75676	0.0761283	822964, 805574, 784081, 797325, 824963, 826073, 791792, 817654, 785147, 775955	136	520	13528	1.9129	1	0.581192	72.6149
GOTERM_BP_FAT	GO:0031396~regulation of protein ubiquitination	4	2.7027	0.0783072	822964, 784081, 785147, 775955	136	100	13528	3.97882	1	0.585882	73.6524
SP_PIR_KEYWORDS	Protease	8	5.40541	0.0783506	788455, 775626, 814144, 822964, 784081, 785147, 791781, 775955	148	484	19235	2.1482	1	0.362046	66.4438
GOTERM_MF_FAT	GO:0008233~peptidase activity	11	7.43243	0.0852087	788455, 775626, 814144, 822964, 783039, 784081, 796346, 785147, 791781, 775955, 788119	139	574	12983	1.78995	1	0.511466	70.7153
GOTERM_BP_FAT	GO:0006511~ubiquitin-dependent protein catabolic process	6	4.05405	0.0949255	822964, 784081, 785147, 791411, 775955, 804644	136	242	13528	2.46621	1	0.636493	80.4345
GOTERM_BP_FAT	GO:0030162~regulation of proteolysis	3	2.02703	0.0980547	775480, 817654, 811696	136	53	13528	5.63041	1	0.640657	81.5121
SP_PIR_KEYWORDS	hydrolase	17	11.4865	0.137109	788455, 813997, 775626, 814144, 802330, 809635, 818987, 801768, 772317, 775955, 820161, 822964, 784081, 783505, 785147, 791781, 788119	148	1555	19235	1.42085	1	0.502503	86.1044
GOTERM_BP_FAT	GO:0043086~negative regulation of catalytic activity	6	4.05405	0.143859	815675, 822964, 784081, 815903, 785147, 775955	136	277	13528	2.1546	1	0.749486	92.1177
GOTERM_BP_FAT	GO:0000278~mitotic cell cycle	7	4.72973	0.165252	795963, 822964, 784977, 784081, 772317, 785147, 775955	136	370	13528	1.88188	1	0.778622	94.7894
GOTERM_BP_FAT	GO:0022402~cell cycle process	9	6.08108	0.203221	795963, 822964, 784977, 784081, 794878, 817654, 772317, 785147, 775955	136	565	13528	1.58449	1	0.833756	97.5667
GOTERM_BP_FAT	GO:0032270~positive regulation of cellular protein metabolic process	5	3.37838	0.203861	822964, 784081, 817654, 785147, 775955	136	233	13528	2.13456	1	0.833028	97.5985
GOTERM_BP_FAT	GO:0051247~positive regulation of protein metabolic process	5	3.37838	0.224772	822964, 784081, 817654, 785147, 775955	136	243	13528	2.04672	1	0.854848	98.4461
GOTERM_MF_FAT	GO:0004252~serine-type endopeptidase activity	4	2.7027	0.225124	775626, 814144, 783039, 796346	139	154	12983	2.42605	1	0.803492	97.0314
GOTERM_BP_FAT	GO:0044092~negative regulation of molecular function	6	4.05405	0.241266	815675, 822964, 784081, 815903, 785147, 775955	136	334	13528	1.7869	1	0.866285	98.9069
GOTERM_BP_FAT	GO:0007049~cell cycle	11	7.43243	0.246817	795963, 822964, 784977, 784081, 817614, 794878, 817654, 772317, 785147, 788149, 775955	136	776	13528	1.41002	1	0.870359	99.0307
GOTERM_BP_FAT	GO:0031401~positive regulation of protein modification process	4	2.7027	0.286684	822964, 784081, 785147, 775955	136	187	13528	2.12771	1	0.89943	99.6018
GOTERM_MF_FAT	GO:0008236~serine-type peptidase activity	4	2.7027	0.293738	775626, 814144, 783039, 796346	139	178	12983	2.09894	1	0.866083	99.1734
GOTERM_MF_FAT	GO:0017171~serine hydrolase activity	4	2.7027	0.299546	775626, 814144, 783039, 796346	139	180	12983	2.07562	1	0.864109	99.2624
GOTERM_MF_FAT	GO:0008237~metallopeptidase activity	4	2.7027	0.30827	788455, 775626, 791781, 788119	139	183	12983	2.04159	1	0.857455	99.3795
GOTERM_BP_FAT	GO:0031399~regulation of protein modification process	5	3.37838	0.339961	822964, 784081, 797325, 785147, 775955	136	295	13528	1.68594	1	0.930963	99.8881
GOTERM_BP_FAT	GO:0006508~proteolysis	12	8.10811	0.484375	788455, 775626, 814144, 822964, 784081, 794878, 785147, 791781, 791411, 775955, 788119, 804644	136	1054	13528	1.13249	1	0.979054	99.998
GOTERM_BP_FAT	GO:0051603~proteolysis involved in cellular protein catabolic process	7	4.72973	0.556718	822964, 784081, 794878, 785147, 791411, 775955, 804644	136	600	13528	1.16049	1	0.989603	99.9998
GOTERM_BP_FAT	GO:0044257~cellular protein catabolic process	7	4.72973	0.561655	822964, 784081, 794878, 785147, 791411, 775955, 804644	136	603	13528	1.15472	1	0.990043	99.9999
GOTERM_BP_FAT	GO:0044265~cellular macromolecule catabolic process	8	5.40541	0.590463	822964, 775623, 784081, 794878, 785147, 791411, 775955, 804644	136	725	13528	1.09761	1	0.992294	100
GOTERM_BP_FAT	GO:0030163~protein catabolic process	7	4.72973	0.592321	822964, 784081, 794878, 785147, 791411, 775955, 804644	136	622	13528	1.11944	1	0.992175	100
GOTERM_BP_FAT	GO:0009057~macromolecule catabolic process	8	5.40541	0.668815	822964, 775623, 784081, 794878, 785147, 791411, 775955, 804644	136	781	13528	1.0189	1	0.996707	100
GOTERM_BP_FAT	GO:0043632~modification-dependent macromolecule catabolic process	6	4.05405	0.683634	822964, 784081, 785147, 791411, 775955, 804644	136	574	13528	1.03976	1	0.997151	100
GOTERM_BP_FAT	GO:0019941~modification-dependent protein catabolic process	6	4.05405	0.683634	822964, 784081, 785147, 791411, 775955, 804644	136	574	13528	1.03976	1	0.997151	100
GOTERM_BP_FAT	GO:0010604~positive regulation of macromolecule metabolic process	8	5.40541	0.759438	822964, 784511, 784081, 793142, 817654, 785147, 791411, 775955	136	857	13528	0.928547	1	0.998923	100
Annotation Cluster 33	Enrichment Score: 1.3239190413163369
Category	Term	Count	%	PValue	Genes	List Total	Pop Hits	Pop Total	Fold Enrichment	Bonferroni	Benjamini	FDR
GOTERM_BP_FAT	GO:0043200~response to amino acid stimulus	3	2.02703	0.012188	794115, 775480, 820495	136	17	13528	17.5536	1	0.254787	18.1745
GOTERM_BP_FAT	GO:0001101~response to acid	3	2.02703	0.0236368	794115, 775480, 820495	136	24	13528	12.4338	1	0.358782	32.38
GOTERM_BP_FAT	GO:0014075~response to amine stimulus	3	2.02703	0.0576283	794115, 775480, 820495	136	39	13528	7.65158	1	0.51563	62.1246
GOTERM_BP_FAT	GO:0009719~response to endogenous stimulus	8	5.40541	0.110818	809178, 794115, 784511, 775480, 817654, 820495, 791781, 803359	136	405	13528	1.96485	1	0.671935	85.3565
GOTERM_BP_FAT	GO:0010243~response to organic nitrogen	3	2.02703	0.130508	794115, 775480, 820495	136	63	13528	4.73669	1	0.722227	89.8474
Annotation Cluster 34	Enrichment Score: 1.292876832453872
Category	Term	Count	%	PValue	Genes	List Total	Pop Hits	Pop Total	Fold Enrichment	Bonferroni	Benjamini	FDR
GOTERM_CC_FAT	GO:0000267~cell fraction	24	16.2162	0.000748801	788455, 809511, 814144, 812048, 777269, 784977, 783885, 796346, 795388, 815359, 791999, 798427, 820893, 795963, 809178, 819709, 823922, 782125, 813329, 794622, 814242, 826073, 820495, 804644	134	1083	12782	2.11386	0.182499	0.00574069	0.979508
GOTERM_CC_FAT	GO:0005626~insoluble fraction	13	8.78378	0.163386	809511, 814144, 777269, 784977, 783885, 798427, 815359, 795963, 782125, 794622, 826073, 814242, 804644	134	839	12782	1.478	1	0.451103	90.4074
GOTERM_CC_FAT	GO:0005624~membrane fraction	12	8.10811	0.220942	795963, 809511, 814144, 777269, 784977, 782125, 783885, 794622, 826073, 815359, 798427, 804644	134	809	12782	1.4149	1	0.546214	96.2402
GOTERM_CC_FAT	GO:0042598~vesicular fraction	5	3.37838	0.249249	795963, 782125, 815359, 798427, 804644	134	244	12782	1.95467	1	0.587866	97.6882
Annotation Cluster 35	Enrichment Score: 1.2594301933413508
Category	Term	Count	%	PValue	Genes	List Total	Pop Hits	Pop Total	Fold Enrichment	Bonferroni	Benjamini	FDR
GOTERM_BP_FAT	GO:0019748~secondary metabolic process	5	3.37838	0.00800167	812048, 785060, 819709, 813329, 821792	136	79	13528	6.29561	0.999975	0.194473	12.3141
GOTERM_BP_FAT	GO:0006732~coenzyme metabolic process	6	4.05405	0.0185851	796931, 812048, 813329, 794852, 821792, 784216	136	153	13528	3.90081	1	0.329079	26.4242
GOTERM_BP_FAT	GO:0051186~cofactor metabolic process	6	4.05405	0.0457671	796931, 812048, 813329, 794852, 821792, 784216	136	195	13528	3.06063	1	0.464289	53.5261
GOTERM_BP_FAT	GO:0046496~nicotinamide nucleotide metabolic process	3	2.02703	0.0602754	812048, 813329, 821792	136	40	13528	7.46029	1	0.525482	63.8278
GOTERM_BP_FAT	GO:0006769~nicotinamide metabolic process	3	2.02703	0.0602754	812048, 813329, 821792	136	40	13528	7.46029	1	0.525482	63.8278
GOTERM_BP_FAT	GO:0009820~alkaloid metabolic process	3	2.02703	0.0629636	812048, 813329, 821792	136	41	13528	7.27834	1	0.535076	65.4837
GOTERM_BP_FAT	GO:0019362~pyridine nucleotide metabolic process	3	2.02703	0.0656918	812048, 813329, 821792	136	42	13528	7.10504	1	0.541293	67.0912
GOTERM_BP_FAT	GO:0006733~oxidoreduction coenzyme metabolic process	3	2.02703	0.0949521	812048, 813329, 821792	136	52	13528	5.73869	1	0.633783	80.4439
GOTERM_BP_FAT	GO:0043603~cellular amide metabolic process	3	2.02703	0.10753	812048, 813329, 821792	136	56	13528	5.32878	1	0.662887	84.4451
UP_SEQ_FEATURE	active site:Proton acceptor	8	5.40541	0.243716	812048, 783039, 813329, 807457, 787596, 821792, 794884, 792407	148	658	19113	1.57011	1	0.998111	98.5144
Annotation Cluster 36	Enrichment Score: 1.0618213617829744
Category	Term	Count	%	PValue	Genes	List Total	Pop Hits	Pop Total	Fold Enrichment	Bonferroni	Benjamini	FDR
GOTERM_MF_FAT	GO:0048037~cofactor binding	7	4.72973	0.0498467	774195, 812048, 819709, 812540, 783505, 807457, 801768	139	249	12983	2.62578	1	0.417565	50.5939
SP_PIR_KEYWORDS	pyridoxal phosphate	3	2.02703	0.0815187	774195, 812540, 783505	148	62	19235	6.28869	1	0.368775	67.9551
GOTERM_MF_FAT	GO:0019842~vitamin binding	4	2.7027	0.160562	774195, 812540, 783505, 784216	139	130	12983	2.87393	1	0.726147	91.05
Annotation Cluster 37	Enrichment Score: 1.0360123464543838
Category	Term	Count	%	PValue	Genes	List Total	Pop Hits	Pop Total	Fold Enrichment	Bonferroni	Benjamini	FDR
GOTERM_MF_FAT	GO:0005080~protein kinase C binding	3	2.02703	0.0225474	783885, 815903, 815507	139	22	12983	12.7368	0.999784	0.27714	26.9833
GOTERM_MF_FAT	GO:0019899~enzyme binding	11	7.43243	0.0521571	795963, 783885, 797325, 814359, 796346, 772395, 815903, 823660, 815507, 793142, 826073	139	523	12983	1.9645	1	0.423364	52.225
GOTERM_MF_FAT	GO:0019901~protein kinase binding	4	2.7027	0.205736	783885, 814359, 815903, 815507	139	147	12983	2.54157	1	0.7817	95.8261
GOTERM_MF_FAT	GO:0019900~kinase binding	4	2.7027	0.296641	783885, 814359, 815903, 815507	139	179	12983	2.08722	1	0.865077	99.2191
Annotation Cluster 38	Enrichment Score: 0.9208338430532137
Category	Term	Count	%	PValue	Genes	List Total	Pop Hits	Pop Total	Fold Enrichment	Bonferroni	Benjamini	FDR
GOTERM_BP_FAT	GO:0030010~establishment of cell polarity	4	2.7027	0.000978454	795963, 794115, 794360, 794878	136	20	13528	19.8941	0.725063	0.0435479	1.58847
GOTERM_BP_FAT	GO:0007163~establishment or maintenance of cell polarity	5	3.37838	0.00141934	795963, 794115, 805574, 794360, 794878	136	49	13528	10.1501	0.846406	0.0586438	2.29647
GOTERM_BP_FAT	GO:0032989~cellular component morphogenesis	7	4.72973	0.205666	795963, 794115, 784977, 805574, 794360, 794878, 788149	136	397	13528	1.75389	1	0.834213	97.686
GOTERM_BP_FAT	GO:0000902~cell morphogenesis	6	4.05405	0.282915	795963, 794115, 805574, 794360, 794878, 788149	136	356	13528	1.67647	1	0.898187	99.5659
GOTERM_BP_FAT	GO:0043009~chordate embryonic development	5	3.37838	0.421493	794115, 784977, 772395, 794360, 794878	136	331	13528	1.50258	1	0.963537	99.9871
GOTERM_BP_FAT	GO:0009792~embryonic development ending in birth or egg hatching	5	3.37838	0.428216	794115, 784977, 772395, 794360, 794878	136	334	13528	1.48908	1	0.965498	99.9893
GOTERM_BP_FAT	GO:0051301~cell division	4	2.7027	0.567566	795963, 794115, 794878, 825820	136	295	13528	1.34875	1	0.990587	99.9999
GOTERM_BP_FAT	GO:0000904~cell morphogenesis involved in differentiation	3	2.02703	0.703399	795963, 794878, 788149	136	244	13528	1.223	1	0.997798	100
GOTERM_BP_FAT	GO:0030030~cell projection organization	3	2.02703	0.885888	795963, 794878, 788149	136	368	13528	0.810902	1	0.999937	100
Annotation Cluster 39	Enrichment Score: 0.8878910148724614
Category	Term	Count	%	PValue	Genes	List Total	Pop Hits	Pop Total	Fold Enrichment	Bonferroni	Benjamini	FDR
GOTERM_BP_FAT	GO:0016331~morphogenesis of embryonic epithelium	4	2.7027	0.0201223	794115, 772395, 794360, 791411	136	58	13528	6.86004	1	0.333851	28.2867
GOTERM_BP_FAT	GO:0014020~primary neural tube formation	3	2.02703	0.0426711	794115, 772395, 794360	136	33	13528	9.04278	1	0.457685	50.9973
GOTERM_BP_FAT	GO:0001841~neural tube formation	3	2.02703	0.0602754	794115, 772395, 794360	136	40	13528	7.46029	1	0.525482	63.8278
GOTERM_BP_FAT	GO:0001838~embryonic epithelial tube formation	3	2.02703	0.0684589	794115, 772395, 794360	136	43	13528	6.93981	1	0.553516	68.6497
GOTERM_BP_FAT	GO:0035148~tube lumen formation	3	2.02703	0.0712641	794115, 772395, 794360	136	44	13528	6.78209	1	0.565457	70.1587
GOTERM_BP_FAT	GO:0060429~epithelium development	6	4.05405	0.0770786	809178, 794115, 817614, 772395, 794360, 791411	136	227	13528	2.62918	1	0.582875	73.072
GOTERM_BP_FAT	GO:0002009~morphogenesis of an epithelium	4	2.7027	0.0801411	794115, 772395, 794360, 791411	136	101	13528	3.93943	1	0.591716	74.4969
GOTERM_BP_FAT	GO:0035239~tube morphogenesis	4	2.7027	0.133809	794115, 772395, 794360, 791781	136	127	13528	3.13293	1	0.729294	90.4599
GOTERM_BP_FAT	GO:0060562~epithelial tube morphogenesis	3	2.02703	0.144104	794115, 772395, 794360	136	67	13528	4.45391	1	0.747787	92.1545
GOTERM_BP_FAT	GO:0021915~neural tube development	3	2.02703	0.147549	794115, 772395, 794360	136	68	13528	4.38841	1	0.752034	92.6553
GOTERM_BP_FAT	GO:0048729~tissue morphogenesis	4	2.7027	0.267714	794115, 772395, 794360, 791411	136	180	13528	2.21046	1	0.886335	99.3882
GOTERM_BP_FAT	GO:0035295~tube development	4	2.7027	0.376733	794115, 772395, 794360, 791781	136	220	13528	1.80856	1	0.947213	99.9562
GOTERM_BP_FAT	GO:0043009~chordate embryonic development	5	3.37838	0.421493	794115, 784977, 772395, 794360, 794878	136	331	13528	1.50258	1	0.963537	99.9871
GOTERM_BP_FAT	GO:0009792~embryonic development ending in birth or egg hatching	5	3.37838	0.428216	794115, 784977, 772395, 794360, 794878	136	334	13528	1.48908	1	0.965498	99.9893
GOTERM_BP_FAT	GO:0048598~embryonic morphogenesis	4	2.7027	0.594753	794115, 772395, 794360, 791411	136	307	13528	1.29603	1	0.992272	100
Annotation Cluster 40	Enrichment Score: 0.8529376195476551
Category	Term	Count	%	PValue	Genes	List Total	Pop Hits	Pop Total	Fold Enrichment	Bonferroni	Benjamini	FDR
SP_PIR_KEYWORDS	cell adhesion	7	4.72973	0.105206	822836, 805802, 814144, 784977, 794360, 817654, 803900	148	422	19235	2.15584	1	0.429572	77.4112
GOTERM_BP_FAT	GO:0007155~cell adhesion	11	7.43243	0.161515	822836, 799778, 805802, 784977, 808953, 782125, 794360, 794878, 817654, 803900, 791411	136	700	13528	1.56311	1	0.774503	94.3944
GOTERM_BP_FAT	GO:0022610~biological adhesion	11	7.43243	0.162529	822836, 799778, 805802, 784977, 808953, 782125, 794360, 794878, 817654, 803900, 791411	136	701	13528	1.56088	1	0.774656	94.5043
Annotation Cluster 41	Enrichment Score: 0.7261002536326454
Category	Term	Count	%	PValue	Genes	List Total	Pop Hits	Pop Total	Fold Enrichment	Bonferroni	Benjamini	FDR
GOTERM_BP_FAT	GO:0051094~positive regulation of developmental process	6	4.05405	0.145396	795829, 782125, 791118, 809635, 817654, 791411	136	278	13528	2.14685	1	0.748819	92.346
GOTERM_BP_FAT	GO:0060284~regulation of cell development	5	3.37838	0.148972	815903, 791118, 809635, 801440, 791411	136	205	13528	2.42611	1	0.753352	92.8534
GOTERM_BP_FAT	GO:0010720~positive regulation of cell development	3	2.02703	0.15101	791118, 809635, 791411	136	69	13528	4.32481	1	0.756178	93.1283
GOTERM_BP_FAT	GO:0045597~positive regulation of cell differentiation	5	3.37838	0.195668	795829, 782125, 791118, 809635, 791411	136	229	13528	2.17185	1	0.828296	97.1606
GOTERM_BP_FAT	GO:0045596~negative regulation of cell differentiation	4	2.7027	0.36586	784977, 782125, 791118, 791411	136	216	13528	1.84205	1	0.942001	99.9419
Annotation Cluster 42	Enrichment Score: 0.726066192195196
Category	Term	Count	%	PValue	Genes	List Total	Pop Hits	Pop Total	Fold Enrichment	Bonferroni	Benjamini	FDR
GOTERM_BP_FAT	GO:0007264~small GTPase mediated signal transduction	7	4.72973	0.0850461	809511, 794115, 774485, 797325, 791118, 814242, 820893	136	305	13528	2.28293	1	0.608542	76.6325
GOTERM_BP_FAT	GO:0007265~Ras protein signal transduction	4	2.7027	0.0876611	794115, 774485, 797325, 791118	136	105	13528	3.78936	1	0.611472	77.7012
GOTERM_BP_FAT	GO:0007242~intracellular signaling cascade	10	6.75676	0.889898	809511, 794115, 784511, 774485, 797325, 791118, 814242, 817654, 791411, 820893	136	1256	13528	0.791963	1	0.999941	100
Annotation Cluster 43	Enrichment Score: 0.6994129210799271
Category	Term	Count	%	PValue	Genes	List Total	Pop Hits	Pop Total	Fold Enrichment	Bonferroni	Benjamini	FDR
SP_PIR_KEYWORDS	cell adhesion	7	4.72973	0.105206	822836, 805802, 814144, 784977, 794360, 817654, 803900	148	422	19235	2.15584	1	0.429572	77.4112
KEGG_PATHWAY	hsa04512:ECM-receptor interaction	4	2.7027	0.161004	805802, 784977, 817654, 804645	85	84	5085	2.84874	1	0.512349	85.1883
INTERPRO	IPR013032:EGF-like region, conserved site	4	2.7027	0.470852	805802, 784977, 826073, 817654	146	293	16659	1.55772	1	0.999453	99.9866
Annotation Cluster 44	Enrichment Score: 0.6970259229950946
Category	Term	Count	%	PValue	Genes	List Total	Pop Hits	Pop Total	Fold Enrichment	Bonferroni	Benjamini	FDR
SP_PIR_KEYWORDS	nucleotide-binding	21	14.1892	0.0321388	797595, 793126, 823976, 815675, 785761, 793981, 793882, 795388, 794878, 809635, 799635, 772317, 820161, 821677, 782125, 796391, 824963, 814242, 777438, 820495, 804644	148	1686	19235	1.6188	0.99995	0.176406	35.4149
SP_PIR_KEYWORDS	atp-binding	17	11.4865	0.0465631	797595, 823976, 815675, 785761, 793981, 793882, 795388, 794878, 809635, 772317, 820161, 782125, 796391, 824963, 777438, 820495, 804644	148	1326	19235	1.66623	0.999999	0.238601	47.1727
GOTERM_MF_FAT	GO:0005524~ATP binding	20	13.5135	0.220714	797595, 823976, 815675, 785761, 793981, 793882, 795388, 794878, 809635, 772317, 820161, 782125, 796391, 824963, 794360, 814242, 777438, 791792, 820495, 804644	139	1477	12983	1.26476	1	0.801857	96.7898
GOTERM_MF_FAT	GO:0032559~adenyl ribonucleotide binding	20	13.5135	0.238526	797595, 823976, 815675, 785761, 793981, 793882, 795388, 794878, 809635, 772317, 820161, 782125, 796391, 824963, 794360, 814242, 777438, 791792, 820495, 804644	139	1497	12983	1.24787	1	0.818935	97.6663
GOTERM_MF_FAT	GO:0001882~nucleoside binding	21	14.1892	0.263144	797595, 823976, 815675, 785761, 793981, 793882, 795388, 794878, 809635, 772317, 820161, 786096, 782125, 796391, 824963, 794360, 814242, 777438, 791792, 820495, 804644	139	1612	12983	1.21679	1	0.843108	98.5167
GOTERM_MF_FAT	GO:0000166~nucleotide binding	28	18.9189	0.270199	797595, 823976, 793126, 794878, 809635, 772317, 820161, 775824, 821677, 807457, 794360, 777438, 820495, 815675, 812048, 785761, 793981, 793882, 795388, 799635, 801768, 819709, 782125, 796391, 824963, 814242, 791792, 804644	139	2245	12983	1.16494	1	0.84737	98.7009
GOTERM_MF_FAT	GO:0032555~purine ribonucleotide binding	23	15.5405	0.305328	797595, 793126, 823976, 815675, 785761, 793981, 793882, 795388, 794878, 809635, 799635, 772317, 820161, 821677, 782125, 796391, 824963, 794360, 814242, 777438, 791792, 820495, 804644	139	1836	12983	1.17008	1	0.858234	99.3421
GOTERM_MF_FAT	GO:0032553~ribonucleotide binding	23	15.5405	0.305328	797595, 793126, 823976, 815675, 785761, 793981, 793882, 795388, 794878, 809635, 799635, 772317, 820161, 821677, 782125, 796391, 824963, 794360, 814242, 777438, 791792, 820495, 804644	139	1836	12983	1.17008	1	0.858234	99.3421
GOTERM_MF_FAT	GO:0030554~adenyl nucleotide binding	20	13.5135	0.31538	797595, 823976, 815675, 785761, 793981, 793882, 795388, 794878, 809635, 772317, 820161, 782125, 796391, 824963, 794360, 814242, 777438, 791792, 820495, 804644	139	1577	12983	1.18456	1	0.86117	99.4619
GOTERM_MF_FAT	GO:0001883~purine nucleoside binding	20	13.5135	0.339846	797595, 823976, 815675, 785761, 793981, 793882, 795388, 794878, 809635, 772317, 820161, 782125, 796391, 824963, 794360, 814242, 777438, 791792, 820495, 804644	139	1601	12983	1.16681	1	0.871101	99.6742
GOTERM_MF_FAT	GO:0017076~purine nucleotide binding	23	15.5405	0.384369	797595, 793126, 823976, 815675, 785761, 793981, 793882, 795388, 794878, 809635, 799635, 772317, 820161, 821677, 782125, 796391, 824963, 794360, 814242, 777438, 791792, 820495, 804644	139	1918	12983	1.12006	1	0.902805	99.8756
Annotation Cluster 45	Enrichment Score: 0.6881845668226575
Category	Term	Count	%	PValue	Genes	List Total	Pop Hits	Pop Total	Fold Enrichment	Bonferroni	Benjamini	FDR
GOTERM_MF_FAT	GO:0016597~amino acid binding	3	2.02703	0.133532	797325, 783505, 784216	139	60	12983	4.67014	1	0.661181	86.1445
GOTERM_MF_FAT	GO:0031406~carboxylic acid binding	4	2.7027	0.19751	819709, 797325, 783505, 784216	139	144	12983	2.59452	1	0.77857	95.1888
GOTERM_MF_FAT	GO:0043176~amine binding	3	2.02703	0.326792	797325, 783505, 784216	139	110	12983	2.54735	1	0.865422	99.5732
Annotation Cluster 46	Enrichment Score: 0.6827743559831281
Category	Term	Count	%	PValue	Genes	List Total	Pop Hits	Pop Total	Fold Enrichment	Bonferroni	Benjamini	FDR
GOTERM_BP_FAT	GO:0002520~immune system development	6	4.05405	0.14233	799749, 784977, 824963, 794878, 809635, 811696	136	276	13528	2.1624	1	0.750196	91.8842
GOTERM_BP_FAT	GO:0030097~hemopoiesis	5	3.37838	0.210073	799749, 784977, 794878, 809635, 811696	136	236	13528	2.10743	1	0.839529	97.8873
GOTERM_BP_FAT	GO:0030099~myeloid cell differentiation	3	2.02703	0.237563	799749, 794878, 811696	136	93	13528	3.20873	1	0.86297	98.8163
GOTERM_BP_FAT	GO:0048534~hemopoietic or lymphoid organ development	5	3.37838	0.261491	799749, 784977, 794878, 809635, 811696	136	260	13528	1.9129	1	0.882117	99.2974
Annotation Cluster 47	Enrichment Score: 0.6790216158373898
Category	Term	Count	%	PValue	Genes	List Total	Pop Hits	Pop Total	Fold Enrichment	Bonferroni	Benjamini	FDR
GOTERM_BP_FAT	GO:0043281~regulation of caspase activity	3	2.02703	0.186412	815675, 824963, 791792	136	79	13528	3.77736	1	0.813569	96.5762
GOTERM_BP_FAT	GO:0052548~regulation of endopeptidase activity	3	2.02703	0.197255	815675, 824963, 791792	136	82	13528	3.63917	1	0.829177	97.2509
GOTERM_BP_FAT	GO:0052547~regulation of peptidase activity	3	2.02703	0.211829	815675, 824963, 791792	136	86	13528	3.4699	1	0.840565	97.9628
GOTERM_BP_FAT	GO:0051336~regulation of hydrolase activity	6	4.05405	0.246846	795963, 809511, 815675, 782130, 824963, 791792	136	337	13528	1.77099	1	0.868948	99.0313
Annotation Cluster 48	Enrichment Score: 0.6610995401261712
Category	Term	Count	%	PValue	Genes	List Total	Pop Hits	Pop Total	Fold Enrichment	Bonferroni	Benjamini	FDR
GOTERM_BP_FAT	GO:0006605~protein targeting	6	4.05405	0.0642443	802976, 797325, 815903, 823660, 791999, 820893	136	215	13528	2.77592	1	0.536185	66.2473
GOTERM_BP_FAT	GO:0017038~protein import	3	2.02703	0.376814	802976, 823660, 791999	136	131	13528	2.27795	1	0.946523	99.9563
GOTERM_BP_FAT	GO:0033365~protein localization in organelle	3	2.02703	0.429278	802976, 823660, 791999	136	146	13528	2.04392	1	0.965354	99.9896
Annotation Cluster 49	Enrichment Score: 0.6240782131191495
Category	Term	Count	%	PValue	Genes	List Total	Pop Hits	Pop Total	Fold Enrichment	Bonferroni	Benjamini	FDR
GOTERM_BP_FAT	GO:0050818~regulation of coagulation	3	2.02703	0.0629636	818455, 796346, 817654	136	41	13528	7.27834	1	0.535076	65.4837
GOTERM_BP_FAT	GO:0009611~response to wounding	7	4.72973	0.435833	805802, 817614, 818455, 796346, 775480, 817654, 791999	136	530	13528	1.31376	1	0.966657	99.9914
GOTERM_BP_FAT	GO:0051241~negative regulation of multicellular organismal process	3	2.02703	0.489053	818455, 796346, 817654	136	164	13528	1.81958	1	0.979793	99.9983
Annotation Cluster 50	Enrichment Score: 0.6208870788730994
Category	Term	Count	%	PValue	Genes	List Total	Pop Hits	Pop Total	Fold Enrichment	Bonferroni	Benjamini	FDR
GOTERM_MF_FAT	GO:0005200~structural constituent of cytoskeleton	4	2.7027	0.0441077	799778, 789529, 802976, 814359	139	74	12983	5.0488	1	0.387927	46.316
GOTERM_CC_FAT	GO:0009898~internal side of plasma membrane	5	3.37838	0.418122	799778, 805919, 789529, 802976, 783500	134	316	12782	1.5093	1	0.7947	99.9188
INTERPRO	IPR011993:Pleckstrin homology-type	3	2.02703	0.743911	799778, 789529, 802976	146	303	16659	1.12973	1	0.999999	100
Annotation Cluster 51	Enrichment Score: 0.6104545939430368
Category	Term	Count	%	PValue	Genes	List Total	Pop Hits	Pop Total	Fold Enrichment	Bonferroni	Benjamini	FDR
BIOCARTA	h_reckPathway:Inhibition of Matrix Metalloproteinases	3	2.02703	0.0186413	775480, 791781, 811696	36	9	1437	13.3056	0.63113	0.392653	16.7723
GOTERM_CC_FAT	GO:0031012~extracellular matrix	8	5.40541	0.0687019	805802, 779124, 775480, 817654, 803900, 791781, 804645, 811696	134	345	12782	2.2119	1	0.230703	60.7529
GOTERM_BP_FAT	GO:0043062~extracellular structure organization	5	3.37838	0.0803725	805802, 779124, 800499, 803900, 804645	136	163	13528	3.05125	1	0.589856	74.6016
GOTERM_BP_FAT	GO:0030198~extracellular matrix organization	4	2.7027	0.0857537	779124, 800499, 803900, 804645	136	104	13528	3.82579	1	0.608799	76.9263
SP_PIR_KEYWORDS	extracellular matrix	5	3.37838	0.113565	805802, 779124, 775480, 803900, 804645	148	241	19235	2.69639	1	0.45052	80.0774
GOTERM_CC_FAT	GO:0005578~proteinaceous extracellular matrix	7	4.72973	0.11704	805802, 779124, 775480, 803900, 791781, 804645, 811696	134	320	12782	2.08661	1	0.349022	80.5179
GOTERM_CC_FAT	GO:0044420~extracellular matrix part	4	2.7027	0.122606	805802, 779124, 775480, 804645	134	117	12782	3.26113	1	0.359418	82.0714
GOTERM_CC_FAT	GO:0005604~basement membrane	3	2.02703	0.194805	805802, 775480, 804645	134	78	12782	3.66877	1	0.500358	94.1992
GOTERM_BP_FAT	GO:0050953~sensory perception of light stimulus	4	2.7027	0.36586	774195, 779124, 775480, 803900	136	216	13528	1.84205	1	0.942001	99.9419
GOTERM_BP_FAT	GO:0007601~visual perception	4	2.7027	0.36586	774195, 779124, 775480, 803900	136	216	13528	1.84205	1	0.942001	99.9419
GOTERM_CC_FAT	GO:0044421~extracellular region part	11	7.43243	0.546184	805802, 775623, 779124, 824963, 775480, 817654, 803900, 792407, 791781, 804645, 811696	134	960	12782	1.09299	1	0.883135	99.9969
GOTERM_CC_FAT	GO:0005576~extracellular region	17	11.4865	0.906361	805802, 814144, 775623, 808953, 785547, 779124, 796346, 775480, 789529, 786096, 824963, 817654, 803900, 792407, 791781, 804645, 811696	134	2010	12782	0.806765	1	0.996439	100
SP_PIR_KEYWORDS	Secreted	9	6.08108	0.951557	805802, 814144, 785547, 779124, 796346, 775480, 803900, 804645, 811696	148	1689	19235	0.692538	1	0.999876	100
GOTERM_BP_FAT	GO:0050890~cognition	5	3.37838	0.983056	795963, 774195, 779124, 775480, 803900	136	909	13528	0.547143	1	1	100
GOTERM_BP_FAT	GO:0007600~sensory perception	4	2.7027	0.989172	774195, 779124, 775480, 803900	136	810	13528	0.491213	1	1	100
GOTERM_BP_FAT	GO:0050877~neurological system process	6	4.05405	0.994667	795963, 774195, 779124, 775480, 820495, 803900	136	1210	13528	0.493243	1	1	100
Annotation Cluster 52	Enrichment Score: 0.6006849769277007
Category	Term	Count	%	PValue	Genes	List Total	Pop Hits	Pop Total	Fold Enrichment	Bonferroni	Benjamini	FDR
GOTERM_BP_FAT	GO:0060284~regulation of cell development	5	3.37838	0.148972	815903, 791118, 809635, 801440, 791411	136	205	13528	2.42611	1	0.753352	92.8534
GOTERM_BP_FAT	GO:0050767~regulation of neurogenesis	4	2.7027	0.230323	815903, 791118, 809635, 801440	136	166	13528	2.39688	1	0.856275	98.6185
GOTERM_BP_FAT	GO:0051960~regulation of nervous system development	4	2.7027	0.300304	815903, 791118, 809635, 801440	136	192	13528	2.0723	1	0.909572	99.7095
GOTERM_BP_FAT	GO:0045664~regulation of neuron differentiation	3	2.02703	0.383933	815903, 791118, 801440	136	133	13528	2.2437	1	0.948786	99.9638
Annotation Cluster 53	Enrichment Score: 0.5379858482965543
Category	Term	Count	%	PValue	Genes	List Total	Pop Hits	Pop Total	Fold Enrichment	Bonferroni	Benjamini	FDR
GOTERM_BP_FAT	GO:0009719~response to endogenous stimulus	8	5.40541	0.110818	809178, 794115, 784511, 775480, 817654, 820495, 791781, 803359	136	405	13528	1.96485	1	0.671935	85.3565
GOTERM_BP_FAT	GO:0043627~response to estrogen stimulus	3	2.02703	0.281967	809178, 775480, 791781	136	105	13528	2.84202	1	0.898476	99.5564
GOTERM_BP_FAT	GO:0048545~response to steroid hormone stimulus	4	2.7027	0.300304	809178, 775480, 817654, 791781	136	192	13528	2.0723	1	0.909572	99.7095
GOTERM_BP_FAT	GO:0009725~response to hormone stimulus	6	4.05405	0.304262	809178, 784511, 775480, 817654, 791781, 803359	136	367	13528	1.62622	1	0.910786	99.7352
GOTERM_BP_FAT	GO:0009628~response to abiotic stimulus	4	2.7027	0.715239	783835, 775480, 817654, 791781	136	368	13528	1.0812	1	0.998163	100
Annotation Cluster 54	Enrichment Score: 0.5130281788154825
Category	Term	Count	%	PValue	Genes	List Total	Pop Hits	Pop Total	Fold Enrichment	Bonferroni	Benjamini	FDR
UP_SEQ_FEATURE	repeat:LRR 7	4	2.7027	0.155984	775623, 785547, 774485, 779124	148	177	19113	2.91846	1	0.989323	92.2345
UP_SEQ_FEATURE	repeat:LRR 6	4	2.7027	0.219603	775623, 785547, 774485, 779124	148	210	19113	2.45985	1	0.997396	97.616
SMART	SM00369:LRR_TYP	3	2.02703	0.257207	785547, 774485, 779124	69	131	9079	3.01328	1	0.850874	95.1231
UP_SEQ_FEATURE	repeat:LRR 5	4	2.7027	0.26252	775623, 785547, 774485, 779124	148	231	19113	2.23622	1	0.998375	98.9835
INTERPRO	IPR001611:Leucine-rich repeat	4	2.7027	0.283418	775623, 785547, 774485, 779124	146	213	16659	2.14277	1	0.989826	99.0628
UP_SEQ_FEATURE	repeat:LRR 4	4	2.7027	0.306394	775623, 785547, 774485, 779124	148	252	19113	2.04987	1	0.999441	99.5966
INTERPRO	IPR003591:Leucine-rich repeat, typical subtype	3	2.02703	0.31608	785547, 774485, 779124	146	131	16659	2.61304	1	0.991389	99.5125
UP_SEQ_FEATURE	repeat:LRR 3	4	2.7027	0.404782	775623, 785547, 774485, 779124	148	299	19113	1.72765	1	0.999942	99.9598
UP_SEQ_FEATURE	repeat:LRR 1	4	2.7027	0.443603	775623, 785547, 774485, 779124	148	318	19113	1.62443	1	0.999952	99.9854
UP_SEQ_FEATURE	repeat:LRR 2	4	2.7027	0.445621	775623, 785547, 774485, 779124	148	319	19113	1.61933	1	0.999943	99.9862
SP_PIR_KEYWORDS	leucine-rich repeat	4	2.7027	0.447548	775623, 785547, 774485, 779124	148	322	19235	1.61449	1	0.897296	99.9644
Annotation Cluster 55	Enrichment Score: 0.5094006578123511
Category	Term	Count	%	PValue	Genes	List Total	Pop Hits	Pop Total	Fold Enrichment	Bonferroni	Benjamini	FDR
UP_SEQ_FEATURE	cross-link:Glycyl lysine isopeptide (Lys-Gly) (interchain with G-Cter in ubiquitin)	4	2.7027	0.196686	786096, 782125, 772395, 775955	148	199	19113	2.59582	1	0.995678	96.3127
SP_PIR_KEYWORDS	isopeptide bond	5	3.37838	0.227761	786096, 817614, 782125, 772395, 775955	148	319	19235	2.03709	1	0.683893	96.8541
SP_PIR_KEYWORDS	ubl conjugation	5	3.37838	0.661522	786096, 782125, 772395, 809635, 775955	148	588	19235	1.10515	1	0.972867	99.9999
Annotation Cluster 56	Enrichment Score: 0.4930653744810937
Category	Term	Count	%	PValue	Genes	List Total	Pop Hits	Pop Total	Fold Enrichment	Bonferroni	Benjamini	FDR
GOTERM_BP_FAT	GO:0002520~immune system development	6	4.05405	0.14233	799749, 784977, 824963, 794878, 809635, 811696	136	276	13528	2.1624	1	0.750196	91.8842
GOTERM_BP_FAT	GO:0045321~leukocyte activation	5	3.37838	0.222655	814144, 784977, 824963, 794878, 791999	136	242	13528	2.05518	1	0.853443	98.3753
GOTERM_BP_FAT	GO:0046649~lymphocyte activation	4	2.7027	0.319427	814144, 784977, 824963, 794878	136	199	13528	1.99941	1	0.919963	99.8153
GOTERM_BP_FAT	GO:0001775~cell activation	5	3.37838	0.321827	814144, 784977, 824963, 794878, 791999	136	287	13528	1.73294	1	0.919809	99.8257
GOTERM_CC_FAT	GO:0043235~receptor complex	3	2.02703	0.340618	784977, 824963, 794878	134	116	12782	2.46693	1	0.715981	99.5799
GOTERM_BP_FAT	GO:0042110~T cell activation	3	2.02703	0.358885	814144, 824963, 794878	136	126	13528	2.36835	1	0.938712	99.9305
GOTERM_CC_FAT	GO:0045202~synapse	3	2.02703	0.887964	784977, 794878, 791999	134	355	12782	0.806096	1	0.995032	100
Annotation Cluster 57	Enrichment Score: 0.47970232364762977
Category	Term	Count	%	PValue	Genes	List Total	Pop Hits	Pop Total	Fold Enrichment	Bonferroni	Benjamini	FDR
GOTERM_BP_FAT	GO:0034660~ncRNA metabolic process	5	3.37838	0.197706	825605, 799749, 807457, 795388, 820495	136	230	13528	2.1624	1	0.828112	97.2761
GOTERM_BP_FAT	GO:0034470~ncRNA processing	4	2.7027	0.286684	825605, 799749, 807457, 820495	136	187	13528	2.12771	1	0.89943	99.6018
GOTERM_BP_FAT	GO:0006396~RNA processing	6	4.05405	0.641901	796817, 825605, 791264, 799749, 807457, 820495	136	547	13528	1.09109	1	0.995468	100
Annotation Cluster 58	Enrichment Score: 0.46307717801277537
Category	Term	Count	%	PValue	Genes	List Total	Pop Hits	Pop Total	Fold Enrichment	Bonferroni	Benjamini	FDR
UP_SEQ_FEATURE	domain:Ig-like C2-type 5	3	2.02703	0.0669718	785547, 801728, 794360	148	55	19113	7.0441	1	0.888422	64.8162
UP_SEQ_FEATURE	domain:Ig-like C2-type 4	3	2.02703	0.11603	785547, 801728, 794360	148	76	19113	5.09771	1	0.967728	84.4094
UP_SEQ_FEATURE	domain:Ig-like C2-type 3	3	2.02703	0.24139	785547, 801728, 794360	148	122	19113	3.17562	1	0.998354	98.4441
INTERPRO	IPR013098:Immunoglobulin I-set	3	2.02703	0.338477	785547, 801728, 794360	146	138	16659	2.48049	1	0.993391	99.6943
UP_SEQ_FEATURE	domain:Ig-like C2-type 2	3	2.02703	0.431962	785547, 801728, 794360	148	191	19113	2.02841	1	0.999968	99.9801
UP_SEQ_FEATURE	domain:Ig-like C2-type 1	3	2.02703	0.432167	785547, 801728, 794360	148	190	19113	2.03908	1	0.999959	99.9802
SMART	SM00408:IGc2	3	2.02703	0.456622	785547, 801728, 794360	69	205	9079	1.92556	1	0.961345	99.7963
INTERPRO	IPR003598:Immunoglobulin subtype 2	3	2.02703	0.534955	785547, 801728, 794360	146	205	16659	1.6698	1	0.999757	99.9978
INTERPRO	IPR013783:Immunoglobulin-like fold	4	2.7027	0.864289	794587, 785547, 801728, 794360	146	553	16659	0.825336	1	1	100
INTERPRO	IPR007110:Immunoglobulin-like	3	2.02703	0.93516	785547, 801728, 794360	146	501	16659	0.68325	1	1	100
Annotation Cluster 59	Enrichment Score: 0.4279396570972844
Category	Term	Count	%	PValue	Genes	List Total	Pop Hits	Pop Total	Fold Enrichment	Bonferroni	Benjamini	FDR
UP_SEQ_FEATURE	domain:EGF-like 3	3	2.02703	0.113525	805802, 826073, 817654	148	75	19113	5.16568	1	0.969638	83.7301
INTERPRO	IPR006209:EGF	3	2.02703	0.303252	805802, 826073, 817654	146	127	16659	2.69534	1	0.991884	99.3676
SMART	SM00181:EGF	3	2.02703	0.446501	805802, 826073, 817654	69	201	9079	1.96388	1	0.967981	99.7544
INTERPRO	IPR013032:EGF-like region, conserved site	4	2.7027	0.470852	805802, 784977, 826073, 817654	146	293	16659	1.55772	1	0.999453	99.9866
INTERPRO	IPR000742:EGF-like, type 3	3	2.02703	0.505386	805802, 826073, 817654	146	194	16659	1.76448	1	0.999689	99.9948
INTERPRO	IPR006210:EGF-like	3	2.02703	0.524342	805802, 826073, 817654	146	201	16659	1.70303	1	0.99975	99.997
SP_PIR_KEYWORDS	egf-like domain	3	2.02703	0.526724	805802, 826073, 817654	148	230	19235	1.69521	1	0.934841	99.9955
Annotation Cluster 60	Enrichment Score: 0.37474093625853167
Category	Term	Count	%	PValue	Genes	List Total	Pop Hits	Pop Total	Fold Enrichment	Bonferroni	Benjamini	FDR
SP_PIR_KEYWORDS	er-golgi transport	3	2.02703	0.132576	805919, 814242, 798427	148	83	19235	4.69757	1	0.495429	85.095
SP_PIR_KEYWORDS	protein transport	6	4.05405	0.31306	805919, 786096, 823660, 814242, 815359, 798427	148	485	19235	1.60783	1	0.776221	99.3432
GOTERM_CC_FAT	GO:0005794~Golgi apparatus	8	5.40541	0.810828	805919, 783500, 814144, 783505, 814242, 794852, 772317, 798427	134	872	12782	0.87512	1	0.984193	100
SP_PIR_KEYWORDS	golgi apparatus	3	2.02703	0.941921	805919, 814242, 798427	148	588	19235	0.663093	1	0.999804	100
Annotation Cluster 61	Enrichment Score: 0.34498185471077747
Category	Term	Count	%	PValue	Genes	List Total	Pop Hits	Pop Total	Fold Enrichment	Bonferroni	Benjamini	FDR
GOTERM_BP_FAT	GO:0001503~ossification	3	2.02703	0.318845	795829, 784511, 791781	136	115	13528	2.59488	1	0.92052	99.8127
GOTERM_BP_FAT	GO:0060348~bone development	3	2.02703	0.348039	795829, 784511, 791781	136	123	13528	2.42611	1	0.933639	99.9085
GOTERM_BP_FAT	GO:0001501~skeletal system development	3	2.02703	0.83147	795829, 784511, 791781	136	319	13528	0.93546	1	0.999721	100
Annotation Cluster 62	Enrichment Score: 0.3248825519846537
Category	Term	Count	%	PValue	Genes	List Total	Pop Hits	Pop Total	Fold Enrichment	Bonferroni	Benjamini	FDR
UP_SEQ_FEATURE	domain:SH3	3	2.02703	0.395988	822573, 823922, 815359	148	177	19113	2.18885	1	0.999956	99.9498
SMART	SM00326:SH3	3	2.02703	0.47655	822573, 823922, 815359	69	213	9079	1.85324	1	0.958695	99.8607
SP_PIR_KEYWORDS	sh3 domain	3	2.02703	0.478458	822573, 823922, 815359	148	210	19235	1.85666	1	0.90977	99.9835
INTERPRO	IPR001452:Src homology-3 domain	3	2.02703	0.555693	822573, 823922, 815359	146	213	16659	1.60708	1	0.999814	99.9988
Annotation Cluster 63	Enrichment Score: 0.30800354310953687
Category	Term	Count	%	PValue	Genes	List Total	Pop Hits	Pop Total	Fold Enrichment	Bonferroni	Benjamini	FDR
GOTERM_BP_FAT	GO:0042254~ribosome biogenesis	3	2.02703	0.34441	825605, 791264, 799749	136	122	13528	2.446	1	0.932145	99.8998
GOTERM_BP_FAT	GO:0022613~ribonucleoprotein complex biogenesis	3	2.02703	0.538822	825605, 791264, 799749	136	180	13528	1.65784	1	0.987726	99.9997
GOTERM_BP_FAT	GO:0006396~RNA processing	6	4.05405	0.641901	796817, 825605, 791264, 799749, 807457, 820495	136	547	13528	1.09109	1	0.995468	100
Annotation Cluster 64	Enrichment Score: 0.2860840827725005
Category	Term	Count	%	PValue	Genes	List Total	Pop Hits	Pop Total	Fold Enrichment	Bonferroni	Benjamini	FDR
GOTERM_CC_FAT	GO:0005813~centrosome	4	2.7027	0.413311	795963, 782125, 815507, 783835	134	224	12782	1.70336	1	0.79327	99.9095
GOTERM_CC_FAT	GO:0005815~microtubule organizing center	4	2.7027	0.492088	795963, 782125, 815507, 783835	134	253	12782	1.50811	1	0.850171	99.9864
GOTERM_CC_FAT	GO:0015630~microtubule cytoskeleton	6	4.05405	0.68144	795963, 782125, 815507, 794878, 783835, 772317	134	549	12782	1.04249	1	0.949591	100
Annotation Cluster 65	Enrichment Score: 0.2810631620860434
Category	Term	Count	%	PValue	Genes	List Total	Pop Hits	Pop Total	Fold Enrichment	Bonferroni	Benjamini	FDR
GOTERM_BP_FAT	GO:0042592~homeostatic process	12	8.10811	0.130008	796931, 813997, 799749, 796346, 818766, 794852, 809635, 792407, 820161, 811696, 799188, 804644	136	751	13528	1.58941	1	0.723242	89.7516
GOTERM_BP_FAT	GO:0019725~cellular homeostasis	7	4.72973	0.321515	813997, 818766, 794852, 792407, 820161, 799188, 804644	136	466	13528	1.49419	1	0.920566	99.8244
GOTERM_BP_FAT	GO:0030003~cellular cation homeostasis	4	2.7027	0.467023	818766, 794852, 820161, 804644	136	254	13528	1.56647	1	0.97541	99.9966
GOTERM_BP_FAT	GO:0055080~cation homeostasis	4	2.7027	0.546471	818766, 794852, 820161, 804644	136	286	13528	1.3912	1	0.988622	99.9998
GOTERM_BP_FAT	GO:0030005~cellular di-, tri-valent inorganic cation homeostasis	3	2.02703	0.665064	818766, 794852, 804644	136	227	13528	1.31459	1	0.996587	100
GOTERM_BP_FAT	GO:0055066~di-, tri-valent inorganic cation homeostasis	3	2.02703	0.692515	818766, 794852, 804644	136	239	13528	1.24858	1	0.997478	100
GOTERM_BP_FAT	GO:0006873~cellular ion homeostasis	4	2.7027	0.725467	818766, 794852, 820161, 804644	136	374	13528	1.06386	1	0.998315	100
GOTERM_BP_FAT	GO:0055082~cellular chemical homeostasis	4	2.7027	0.73541	818766, 794852, 820161, 804644	136	380	13528	1.04706	1	0.998489	100
GOTERM_BP_FAT	GO:0048878~chemical homeostasis	5	3.37838	0.756858	796346, 818766, 794852, 820161, 804644	136	512	13528	0.971392	1	0.998894	100
GOTERM_BP_FAT	GO:0050801~ion homeostasis	4	2.7027	0.779536	818766, 794852, 820161, 804644	136	409	13528	0.972817	1	0.999253	100
Annotation Cluster 66	Enrichment Score: 0.19578088812432273
Category	Term	Count	%	PValue	Genes	List Total	Pop Hits	Pop Total	Fold Enrichment	Bonferroni	Benjamini	FDR
GOTERM_BP_FAT	GO:0043623~cellular protein complex assembly	3	2.02703	0.482602	785761, 823660, 824963	136	162	13528	1.84205	1	0.978992	99.9979
GOTERM_BP_FAT	GO:0051259~protein oligomerization	3	2.02703	0.520549	797325, 818455, 807457	136	174	13528	1.71501	1	0.985238	99.9994
GOTERM_BP_FAT	GO:0070271~protein complex biogenesis	6	4.05405	0.570759	785761, 797325, 818455, 807457, 823660, 824963	136	505	13528	1.18183	1	0.990787	99.9999
GOTERM_BP_FAT	GO:0006461~protein complex assembly	6	4.05405	0.570759	785761, 797325, 818455, 807457, 823660, 824963	136	505	13528	1.18183	1	0.990787	99.9999
GOTERM_BP_FAT	GO:0034621~cellular macromolecular complex subunit organization	4	2.7027	0.695738	785761, 823660, 824963, 825820	136	357	13528	1.11452	1	0.997554	100
GOTERM_BP_FAT	GO:0043933~macromolecular complex subunit organization	7	4.72973	0.718356	785761, 797325, 818455, 807457, 823660, 824963, 825820	136	710	13528	0.980696	1	0.998219	100
GOTERM_BP_FAT	GO:0065003~macromolecular complex assembly	6	4.05405	0.799566	785761, 797325, 818455, 807457, 823660, 824963	136	665	13528	0.897479	1	0.999499	100
GOTERM_BP_FAT	GO:0034622~cellular macromolecular complex assembly	3	2.02703	0.830149	785761, 823660, 824963	136	318	13528	0.938402	1	0.999719	100
Annotation Cluster 67	Enrichment Score: 0.18459377121745654
Category	Term	Count	%	PValue	Genes	List Total	Pop Hits	Pop Total	Fold Enrichment	Bonferroni	Benjamini	FDR
GOTERM_BP_FAT	GO:0008285~negative regulation of cell proliferation	6	4.05405	0.292583	783393, 783770, 782125, 793142, 817654, 791411	136	361	13528	1.65325	1	0.903797	99.6523
GOTERM_BP_FAT	GO:0009968~negative regulation of signal transduction	4	2.7027	0.379446	793142, 826073, 817654, 791411	136	221	13528	1.80037	1	0.947181	99.9592
GOTERM_BP_FAT	GO:0010648~negative regulation of cell communication	4	2.7027	0.451451	793142, 826073, 817654, 791411	136	248	13528	1.60436	1	0.971324	99.9946
GOTERM_MF_FAT	GO:0003712~transcription cofactor activity	5	3.37838	0.541766	784511, 783039, 797325, 793142, 791411	139	363	12983	1.28654	1	0.969155	99.9979
GOTERM_BP_FAT	GO:0031328~positive regulation of cellular biosynthetic process	5	3.37838	0.915925	784511, 785761, 793142, 817654, 791411	136	685	13528	0.726063	1	0.999981	100
GOTERM_BP_FAT	GO:0009891~positive regulation of biosynthetic process	5	3.37838	0.921347	784511, 785761, 793142, 817654, 791411	136	695	13528	0.715616	1	0.999986	100
GOTERM_BP_FAT	GO:0010557~positive regulation of macromolecule biosynthetic process	4	2.7027	0.961861	784511, 793142, 817654, 791411	136	654	13528	0.608383	1	0.999999	100
GOTERM_BP_FAT	GO:0051173~positive regulation of nitrogen compound metabolic process	3	2.02703	0.989557	784511, 785761, 791411	136	644	13528	0.463372	1	1	100
GOTERM_BP_FAT	GO:0006350~transcription	5	3.37838	1	784511, 783039, 782125, 793142, 791411	136	2101	13528	0.236722	1	1	100
Annotation Cluster 68	Enrichment Score: 0.16992048358421957
Category	Term	Count	%	PValue	Genes	List Total	Pop Hits	Pop Total	Fold Enrichment	Bonferroni	Benjamini	FDR
GOTERM_BP_FAT	GO:0000226~microtubule cytoskeleton organization	3	2.02703	0.432696	795963, 794878, 772317	136	147	13528	2.03001	1	0.966061	99.9906
GOTERM_CC_FAT	GO:0015630~microtubule cytoskeleton	6	4.05405	0.68144	795963, 782125, 815507, 794878, 783835, 772317	134	549	12782	1.04249	1	0.949591	100
GOTERM_BP_FAT	GO:0007017~microtubule-based process	3	2.02703	0.722188	795963, 794878, 772317	136	253	13528	1.17949	1	0.998296	100
GOTERM_BP_FAT	GO:0022403~cell cycle phase	4	2.7027	0.786505	795963, 784977, 794878, 772317	136	414	13528	0.961068	1	0.999342	100
GOTERM_BP_FAT	GO:0000279~M phase	3	2.02703	0.84418	795963, 794878, 772317	136	329	13528	0.907027	1	0.999793	100
Annotation Cluster 69	Enrichment Score: 0.15592525075278493
Category	Term	Count	%	PValue	Genes	List Total	Pop Hits	Pop Total	Fold Enrichment	Bonferroni	Benjamini	FDR
GOTERM_BP_FAT	GO:0002694~regulation of leukocyte activation	3	2.02703	0.495455	824963, 793142, 817654	136	166	13528	1.79766	1	0.98089	99.9986
GOTERM_BP_FAT	GO:0050865~regulation of cell activation	3	2.02703	0.523628	824963, 793142, 817654	136	175	13528	1.70521	1	0.985509	99.9995
GOTERM_BP_FAT	GO:0006915~apoptosis	6	4.05405	0.723386	823629, 797325, 824963, 793142, 791792, 817654	136	602	13528	0.991401	1	0.998292	100
GOTERM_BP_FAT	GO:0008219~cell death	7	4.72973	0.729616	823629, 797325, 795388, 824963, 793142, 791792, 817654	136	719	13528	0.96842	1	0.998399	100
GOTERM_BP_FAT	GO:0012501~programmed cell death	6	4.05405	0.735388	823629, 797325, 824963, 793142, 791792, 817654	136	611	13528	0.976798	1	0.998525	100
GOTERM_BP_FAT	GO:0016265~death	7	4.72973	0.735735	823629, 797325, 795388, 824963, 793142, 791792, 817654	136	724	13528	0.961732	1	0.998462	100
GOTERM_BP_FAT	GO:0043065~positive regulation of apoptosis	4	2.7027	0.807603	797325, 824963, 793142, 775480	136	430	13528	0.925308	1	0.999563	100
GOTERM_BP_FAT	GO:0043068~positive regulation of programmed cell death	4	2.7027	0.811359	797325, 824963, 793142, 775480	136	433	13528	0.918897	1	0.999579	100
GOTERM_BP_FAT	GO:0010942~positive regulation of cell death	4	2.7027	0.813829	797325, 824963, 793142, 775480	136	435	13528	0.914672	1	0.999593	100
Annotation Cluster 70	Enrichment Score: 0.1532563303607479
Category	Term	Count	%	PValue	Genes	List Total	Pop Hits	Pop Total	Fold Enrichment	Bonferroni	Benjamini	FDR
GOTERM_BP_FAT	GO:0009611~response to wounding	7	4.72973	0.435833	805802, 817614, 818455, 796346, 775480, 817654, 791999	136	530	13528	1.31376	1	0.966657	99.9914
GOTERM_BP_FAT	GO:0006954~inflammatory response	3	2.02703	0.839203	817614, 817654, 791999	136	325	13528	0.91819	1	0.999768	100
GOTERM_BP_FAT	GO:0006952~defense response	4	2.7027	0.948515	784977, 817614, 817654, 791999	136	615	13528	0.646963	1	0.999998	100
Annotation Cluster 71	Enrichment Score: 0.13904975520041438
Category	Term	Count	%	PValue	Genes	List Total	Pop Hits	Pop Total	Fold Enrichment	Bonferroni	Benjamini	FDR
GOTERM_CC_FAT	GO:0000139~Golgi membrane	3	2.02703	0.579492	805919, 783500, 798427	134	186	12782	1.53852	1	0.900466	99.9989
GOTERM_CC_FAT	GO:0005794~Golgi apparatus	8	5.40541	0.810828	805919, 783500, 814144, 783505, 814242, 794852, 772317, 798427	134	872	12782	0.87512	1	0.984193	100
GOTERM_CC_FAT	GO:0044431~Golgi apparatus part	3	2.02703	0.814469	805919, 783500, 798427	134	294	12782	0.973348	1	0.984349	100
Annotation Cluster 72	Enrichment Score: 0.12091672855853525
Category	Term	Count	%	PValue	Genes	List Total	Pop Hits	Pop Total	Fold Enrichment	Bonferroni	Benjamini	FDR
GOTERM_MF_FAT	GO:0003714~transcription corepressor activity	3	2.02703	0.457825	783039, 797325, 793142	139	145	12983	1.93247	1	0.938966	99.9784
GOTERM_MF_FAT	GO:0008134~transcription factor binding	7	4.72973	0.46493	784511, 783039, 797325, 793142, 814242, 791411, 791999	139	513	12983	1.2745	1	0.940498	99.982
GOTERM_MF_FAT	GO:0003712~transcription cofactor activity	5	3.37838	0.541766	784511, 783039, 797325, 793142, 791411	139	363	12983	1.28654	1	0.969155	99.9979
GOTERM_BP_FAT	GO:0045934~negative regulation of nucleobase, nucleoside, nucleotide and nucleic acid metabolic process	6	4.05405	0.583107	783393, 783770, 783039, 797325, 793142, 820893	136	512	13528	1.16567	1	0.991839	99.9999
GOTERM_BP_FAT	GO:0051172~negative regulation of nitrogen compound metabolic process	6	4.05405	0.595266	783393, 783770, 783039, 797325, 793142, 820893	136	519	13528	1.14995	1	0.992171	100
GOTERM_BP_FAT	GO:0010558~negative regulation of macromolecule biosynthetic process	6	4.05405	0.641901	783393, 783770, 783039, 797325, 793142, 820893	136	547	13528	1.09109	1	0.995468	100
GOTERM_MF_FAT	GO:0016564~transcription repressor activity	4	2.7027	0.656954	783770, 783039, 797325, 793142	139	316	12983	1.18231	1	0.989434	100
GOTERM_BP_FAT	GO:0031327~negative regulation of cellular biosynthetic process	6	4.05405	0.66395	783393, 783770, 783039, 797325, 793142, 820893	136	561	13528	1.06386	1	0.996604	100
GOTERM_BP_FAT	GO:0016481~negative regulation of transcription	5	3.37838	0.676875	783770, 783039, 797325, 793142, 820893	136	459	13528	1.08356	1	0.996966	100
GOTERM_BP_FAT	GO:0009890~negative regulation of biosynthetic process	6	4.05405	0.682147	783393, 783770, 783039, 797325, 793142, 820893	136	573	13528	1.04158	1	0.997148	100
GOTERM_BP_FAT	GO:0010629~negative regulation of gene expression	5	3.37838	0.745838	783770, 783039, 797325, 793142, 820893	136	504	13528	0.986811	1	0.998664	100
GOTERM_BP_FAT	GO:0045892~negative regulation of transcription, DNA-dependent	3	2.02703	0.874292	783039, 793142, 820893	136	356	13528	0.838235	1	0.999912	100
GOTERM_BP_FAT	GO:0051253~negative regulation of RNA metabolic process	3	2.02703	0.880218	783039, 793142, 820893	136	362	13528	0.824342	1	0.999924	100
GOTERM_BP_FAT	GO:0006357~regulation of transcription from RNA polymerase II promoter	4	2.7027	0.978609	784511, 783039, 772395, 793142	136	727	13528	0.547293	1	1	100
GOTERM_MF_FAT	GO:0030528~transcription regulator activity	8	5.40541	0.997592	825605, 783770, 784511, 783039, 782125, 797325, 793142, 791411	139	1512	12983	0.494195	1	1	100
GOTERM_BP_FAT	GO:0006355~regulation of transcription, DNA-dependent	9	6.08108	0.997936	784511, 783039, 782125, 795791, 772395, 793142, 814242, 791411, 820893	136	1773	13528	0.504927	1	1	100
GOTERM_BP_FAT	GO:0051252~regulation of RNA metabolic process	9	6.08108	0.998461	784511, 783039, 782125, 795791, 772395, 793142, 814242, 791411, 820893	136	1813	13528	0.493787	1	1	100
GOTERM_BP_FAT	GO:0045449~regulation of transcription	11	7.43243	0.99997	783770, 784511, 783039, 782125, 797325, 795791, 772395, 793142, 814242, 791411, 820893	136	2601	13528	0.420675	1	1	100
SP_PIR_KEYWORDS	transcription regulation	4	2.7027	0.999988	784511, 783039, 782125, 793142	148	2026	19235	0.256597	1	1	100
SP_PIR_KEYWORDS	Transcription	4	2.7027	0.999991	784511, 783039, 782125, 793142	148	2071	19235	0.251021	1	1	100
GOTERM_BP_FAT	GO:0006350~transcription	5	3.37838	1	784511, 783039, 782125, 793142, 791411	136	2101	13528	0.236722	1	1	100
Annotation Cluster 73	Enrichment Score: 0.07455537632906303
Category	Term	Count	%	PValue	Genes	List Total	Pop Hits	Pop Total	Fold Enrichment	Bonferroni	Benjamini	FDR
UP_SEQ_FEATURE	disulfide bond	22	14.8649	0.598843	783393, 813997, 805802, 814144, 775626, 784977, 779124, 785547, 775480, 803359, 801728, 796391, 794360, 826073, 817654, 803900, 806127, 791781, 804645, 811696, 799188, 804644	148	2819	19113	1.00785	1	0.999999	99.9999
SP_PIR_KEYWORDS	disulfide bond	22	14.8649	0.656751	783393, 813997, 805802, 814144, 775626, 784977, 779124, 785547, 775480, 803359, 801728, 796391, 794360, 826073, 817654, 803900, 806127, 791781, 804645, 811696, 799188, 804644	148	2924	19235	0.977858	1	0.972676	99.9999
SP_PIR_KEYWORDS	signal	19	12.8378	0.952373	805802, 815675, 784977, 785547, 779124, 782629, 796346, 800499, 775480, 784769, 794360, 826073, 817654, 803900, 791781, 804645, 806127, 811696, 804644	148	3250	19235	0.759802	1	0.999871	100
UP_SEQ_FEATURE	signal peptide	19	12.8378	0.955612	805802, 815675, 784977, 785547, 779124, 782629, 796346, 800499, 775480, 784769, 794360, 826073, 817654, 803900, 791781, 804645, 806127, 811696, 804644	148	3250	19113	0.754983	1	1	100
SP_PIR_KEYWORDS	glycoprotein	21	14.1892	0.997605	788455, 802976, 805802, 814144, 775626, 784977, 779124, 785547, 817614, 796346, 782629, 800499, 784769, 794360, 826073, 817654, 791781, 804645, 806127, 811696, 804644	148	4318	19235	0.632073	1	1	100
UP_SEQ_FEATURE	glycosylation site:N-linked (GlcNAc...)	17	11.4865	0.999784	788455, 805802, 814144, 775626, 784977, 785547, 782629, 796346, 800499, 784769, 794360, 826073, 817654, 804645, 806127, 804644, 811696	148	4129	19113	0.531706	1	1	100
Annotation Cluster 74	Enrichment Score: 0.05316385851878998
Category	Term	Count	%	PValue	Genes	List Total	Pop Hits	Pop Total	Fold Enrichment	Bonferroni	Benjamini	FDR
GOTERM_BP_FAT	GO:0045859~regulation of protein kinase activity	3	2.02703	0.862728	815903, 826073, 817654	136	345	13528	0.864962	1	0.99988	100
GOTERM_BP_FAT	GO:0051174~regulation of phosphorus metabolic process	4	2.7027	0.867262	797325, 815903, 826073, 817654	136	485	13528	0.820376	1	0.999894	100
GOTERM_BP_FAT	GO:0019220~regulation of phosphate metabolic process	4	2.7027	0.867262	797325, 815903, 826073, 817654	136	485	13528	0.820376	1	0.999894	100
GOTERM_BP_FAT	GO:0043549~regulation of kinase activity	3	2.02703	0.875298	815903, 826073, 817654	136	357	13528	0.835887	1	0.999912	100
GOTERM_BP_FAT	GO:0051338~regulation of transferase activity	3	2.02703	0.889529	815903, 826073, 817654	136	372	13528	0.802182	1	0.999942	100
GOTERM_BP_FAT	GO:0042325~regulation of phosphorylation	3	2.02703	0.949569	815903, 826073, 817654	136	466	13528	0.640369	1	0.999998	100
Annotation Cluster 75	Enrichment Score: 0.04622042507586145
Category	Term	Count	%	PValue	Genes	List Total	Pop Hits	Pop Total	Fold Enrichment	Bonferroni	Benjamini	FDR
SP_PIR_KEYWORDS	transmembrane protein	7	4.72973	0.367229	788455, 813015, 814144, 823629, 784977, 794360, 826073	148	642	19235	1.41708	1	0.830987	99.7812
GOTERM_CC_FAT	GO:0005887~integral to plasma membrane	8	5.40541	0.969413	822836, 788455, 783770, 784977, 794360, 794878, 826073, 791781	134	1188	12782	0.642344	1	0.999733	100
GOTERM_CC_FAT	GO:0031226~intrinsic to plasma membrane	8	5.40541	0.974379	822836, 788455, 783770, 784977, 794360, 794878, 826073, 791781	134	1215	12782	0.62807	1	0.999811	100
SP_PIR_KEYWORDS	receptor	6	4.05405	0.994594	814144, 784977, 821677, 794360, 826073, 806127	148	1583	19235	0.492607	1	1	100
UP_SEQ_FEATURE	topological domain:Extracellular	8	5.40541	0.999947	775626, 814144, 784977, 794360, 826073, 783835, 791781, 806127	148	2719	19113	0.379969	1	1	100
UP_SEQ_FEATURE	topological domain:Cytoplasmic	9	6.08108	0.999997	788455, 775626, 814144, 784977, 794360, 826073, 783835, 791781, 806127	148	3374	19113	0.34448	1	1	100
SP_PIR_KEYWORDS	transmembrane	13	8.78378	1	788455, 775626, 814144, 777269, 784977, 803359, 823629, 794360, 826073, 795261, 783835, 791781, 806127	148	4973	19235	0.339747	1	1	100
UP_SEQ_FEATURE	transmembrane region	12	8.10811	1	788455, 775626, 814144, 777269, 823629, 784977, 794360, 826073, 795261, 783835, 791781, 806127	148	4911	19113	0.315557	1	1	100
GOTERM_CC_FAT	GO:0016021~integral to membrane	20	13.5135	1	788455, 815675, 775626, 814144, 777269, 784977, 794878, 812449, 803359, 822836, 783770, 823629, 823660, 824963, 794360, 826073, 795261, 783835, 791781, 806127	134	5297	12782	0.360159	1	1	100
GOTERM_CC_FAT	GO:0031224~intrinsic to membrane	21	14.1892	1	788455, 815675, 775626, 814144, 777269, 784977, 815507, 794878, 812449, 803359, 822836, 783770, 823629, 823660, 824963, 794360, 826073, 795261, 783835, 791781, 806127	134	5485	12782	0.365205	1	1	100

## Sheet:  Chondrogenic BPfat
Category	Term	Count	%	PValue	Genes	List Total	Pop Hits	Pop Total	Fold Enrichment	Bonferroni	Benjamini	FDR
GOTERM_BP_FAT	GO:0000904~cell morphogenesis involved in differentiation	13	11.7117	9.16564e-08	775740, 823371, 788771, 794878, 783768, 790215, 779157, 795963, 809326, 800485, 818676, 811688, 791615	93	244	13528	7.75004	0.000132068	0.000132068	0.000151551
GOTERM_BP_FAT	GO:0007155~cell adhesion	19	17.1171	9.07514e-07	826111, 823371, 784977, 802187, 778543, 814479, 794878, 789359, 820867, 813535, 775692, 825565, 800485, 811688, 780448, 817654, 782974, 791411, 784099	93	700	13528	3.94826	0.00130687	0.00065365	0.00150054
GOTERM_BP_FAT	GO:0022610~biological adhesion	19	17.1171	9.2642e-07	826111, 823371, 784977, 802187, 778543, 814479, 794878, 789359, 820867, 813535, 775692, 825565, 800485, 811688, 780448, 817654, 782974, 791411, 784099	93	701	13528	3.94263	0.00133408	0.000444891	0.0015318
GOTERM_BP_FAT	GO:0048667~cell morphogenesis involved in neuron differentiation	11	9.90991	1.49555e-06	795963, 775740, 809326, 818676, 800485, 788771, 811688, 783768, 791615, 790215, 779157	93	209	13528	7.65591	0.00215277	0.000538628	0.00247282
GOTERM_BP_FAT	GO:0016044~membrane organization	14	12.6126	1.70395e-06	795829, 783768, 820867, 816597, 795963, 801761, 811688, 826073, 791615, 817654, 806127, 803569, 804233, 784099	93	381	13528	5.34507	0.00245238	0.000490959	0.0028174
GOTERM_BP_FAT	GO:0032989~cellular component morphogenesis	14	12.6126	2.68552e-06	775740, 823371, 784977, 788771, 794878, 783768, 790215, 779157, 795963, 809326, 800485, 818676, 811688, 791615	93	397	13528	5.12966	0.00386237	0.000644766	0.00444034
GOTERM_BP_FAT	GO:0042062~long-term strengthening of neuromuscular junction	4	3.6036	3.01419e-06	809326, 818676, 790215, 779157	93	5	13528	116.37	0.00433403	0.000620301	0.00498376
GOTERM_BP_FAT	GO:0030036~actin cytoskeleton organization	11	9.90991	3.02483e-06	795963, 804583, 795829, 784977, 778146, 788771, 784611, 794878, 783768, 789056, 813535	93	226	13528	7.08003	0.00434931	0.000544701	0.00500136
GOTERM_BP_FAT	GO:0006928~cell motion	15	13.5135	3.66141e-06	826111, 823371, 784977, 814479, 788771, 783768, 794878, 790215, 779157, 795963, 775692, 809326, 800485, 818676, 817654	93	475	13528	4.59355	0.00526221	0.000586062	0.00605387
GOTERM_BP_FAT	GO:0000902~cell morphogenesis	13	11.7117	5.01104e-06	775740, 823371, 788771, 794878, 783768, 790215, 779157, 795963, 809326, 800485, 818676, 811688, 791615	93	356	13528	5.31183	0.00719492	0.000721832	0.00828529
GOTERM_BP_FAT	GO:0030029~actin filament-based process	11	9.90991	5.36003e-06	795963, 804583, 795829, 784977, 778146, 788771, 784611, 794878, 783768, 789056, 813535	93	241	13528	6.63936	0.00769407	0.000701919	0.00886228
GOTERM_BP_FAT	GO:0010033~response to organic substance	18	16.2162	6.14066e-06	818836, 794153, 818352, 826111, 792654, 784511, 822682, 801761, 780030, 791615, 821489, 817654, 820495, 787908, 810395, 803569, 804233, 784099	93	721	13528	3.63152	0.00880968	0.000737121	0.0101529
GOTERM_BP_FAT	GO:0031646~positive regulation of neurological system process	6	5.40541	6.2529e-06	809326, 818676, 826111, 780030, 790215, 779157	93	39	13528	22.3788	0.00896999	0.000692872	0.0103385
GOTERM_BP_FAT	GO:0007409~axonogenesis	10	9.00901	6.36314e-06	795963, 775740, 809326, 818676, 800485, 788771, 811688, 783768, 790215, 779157	93	193	13528	7.53691	0.00912741	0.000654737	0.0105207
GOTERM_BP_FAT	GO:0007010~cytoskeleton organization	14	12.6126	7.45294e-06	804583, 795829, 784977, 788771, 783768, 789056, 794878, 813535, 795963, 778146, 801728, 784611, 791615, 804233	93	436	13528	4.67081	0.0106823	0.000715726	0.0123225
GOTERM_BP_FAT	GO:0008582~regulation of synaptic growth at neuromuscular junction	4	3.6036	1.04459e-05	809326, 818676, 790215, 779157	93	7	13528	83.1214	0.0149398	0.000940343	0.0172705
GOTERM_BP_FAT	GO:0048812~neuron projection morphogenesis	10	9.00901	1.40839e-05	795963, 775740, 809326, 818676, 800485, 788771, 811688, 783768, 790215, 779157	93	213	13528	6.82922	0.0200906	0.00119312	0.0232849
GOTERM_BP_FAT	GO:0048638~regulation of developmental growth	6	5.40541	1.59603e-05	809326, 818676, 790215, 779157, 819944, 804233	93	47	13528	18.5697	0.0227365	0.0012769	0.0263866
GOTERM_BP_FAT	GO:0006897~endocytosis	10	9.00901	1.82243e-05	795829, 801761, 811688, 826073, 817654, 820867, 806127, 784099, 804233, 803569	93	220	13528	6.61193	0.0259196	0.00138123	0.030129
GOTERM_BP_FAT	GO:0010324~membrane invagination	10	9.00901	1.82243e-05	795829, 801761, 811688, 826073, 817654, 820867, 806127, 784099, 804233, 803569	93	220	13528	6.61193	0.0259196	0.00138123	0.030129
GOTERM_BP_FAT	GO:0030433~ER-associated protein catabolic process	5	4.5045	1.9179e-05	818836, 809326, 818676, 790215, 779157	93	24	13528	30.3047	0.0272587	0.0013809	0.0317071
GOTERM_BP_FAT	GO:0022411~cellular component disassembly	6	5.40541	2.89147e-05	795963, 809292, 823371, 814479, 791615, 787982	93	53	13528	16.4674	0.0408105	0.00198216	0.0477988
GOTERM_BP_FAT	GO:0032269~negative regulation of cellular protein metabolic process	9	8.10811	3.02095e-05	809326, 818676, 814479, 822682, 790215, 817654, 779157, 820867, 787908	93	180	13528	7.27312	0.0425986	0.0019768	0.0499388
GOTERM_BP_FAT	GO:0030030~cell projection organization	12	10.8108	3.88629e-05	795963, 775740, 809326, 818676, 800485, 788771, 811688, 794878, 783768, 791615, 790215, 779157	93	368	13528	4.74334	0.0544632	0.00243193	0.0642393
GOTERM_BP_FAT	GO:0051248~negative regulation of protein metabolic process	9	8.10811	3.96726e-05	809326, 818676, 814479, 822682, 790215, 817654, 779157, 820867, 787908	93	187	13528	7.00086	0.0555659	0.00237922	0.0655773
GOTERM_BP_FAT	GO:0051240~positive regulation of multicellular organismal process	10	9.00901	4.11829e-05	794781, 809326, 818676, 826111, 801761, 780030, 791615, 790215, 817654, 779157	93	244	13528	5.96157	0.0576191	0.00237102	0.0680729
GOTERM_BP_FAT	GO:0048858~cell projection morphogenesis	10	9.00901	4.2517e-05	795963, 775740, 809326, 818676, 800485, 788771, 811688, 783768, 790215, 779157	93	245	13528	5.93724	0.0594291	0.0023537	0.0702774
GOTERM_BP_FAT	GO:0009611~response to wounding	14	12.6126	5.7907e-05	794781, 826111, 814479, 783768, 794018, 775692, 800485, 801761, 780030, 811688, 791615, 817654, 803569, 787908	93	530	13528	3.8424	0.0800596	0.00308584	0.0957045
GOTERM_BP_FAT	GO:0032990~cell part morphogenesis	10	9.00901	5.97781e-05	795963, 775740, 809326, 818676, 800485, 788771, 811688, 783768, 790215, 779157	93	256	13528	5.68212	0.0825368	0.0030718	0.0987955
GOTERM_BP_FAT	GO:0031175~neuron projection development	10	9.00901	5.97781e-05	795963, 775740, 809326, 818676, 800485, 788771, 811688, 783768, 790215, 779157	93	256	13528	5.68212	0.0825368	0.0030718	0.0987955
GOTERM_BP_FAT	GO:0051969~regulation of transmission of nerve impulse	8	7.20721	6.28171e-05	809326, 818676, 826111, 811688, 780030, 790215, 779157, 804233	93	147	13528	7.91632	0.086546	0.00311659	0.103816
GOTERM_BP_FAT	GO:0050766~positive regulation of phagocytosis	4	3.6036	6.40579e-05	794018, 826111, 801761, 784099	93	12	13528	48.4875	0.088178	0.00307229	0.105865
GOTERM_BP_FAT	GO:0031644~regulation of neurological system process	8	7.20721	8.08893e-05	809326, 818676, 826111, 811688, 780030, 790215, 779157, 804233	93	153	13528	7.60588	0.110029	0.00375314	0.133664
GOTERM_BP_FAT	GO:0032268~regulation of cellular protein metabolic process	13	11.7117	8.47557e-05	794781, 826111, 814479, 790215, 822682, 779157, 820867, 809326, 818676, 782385, 817654, 804233, 787908	93	474	13528	3.98947	0.114974	0.00380954	0.140049
GOTERM_BP_FAT	GO:0048666~neuron development	11	9.90991	9.96933e-05	795963, 775740, 809326, 818676, 800485, 788771, 811688, 783768, 791615, 790215, 779157	93	339	13528	4.72002	0.133822	0.00434403	0.164712
GOTERM_BP_FAT	GO:0051971~positive regulation of transmission of nerve impulse	5	4.5045	0.000111417	809326, 818676, 826111, 790215, 779157	93	37	13528	19.6571	0.148334	0.00471125	0.184066
GOTERM_BP_FAT	GO:0016192~vesicle-mediated transport	14	12.6126	0.000133991	818836, 795829, 783768, 820867, 807973, 812705, 801761, 811688, 826073, 817654, 806127, 803569, 804233, 784099	93	576	13528	3.53554	0.175595	0.00550177	0.221319
GOTERM_BP_FAT	GO:0006953~acute-phase response	5	4.5045	0.000151792	794781, 801761, 780030, 787908, 803569	93	40	13528	18.1828	0.196476	0.00605793	0.250688
GOTERM_BP_FAT	GO:0050764~regulation of phagocytosis	4	3.6036	0.00015987	794018, 826111, 801761, 784099	93	16	13528	36.3656	0.205778	0.00620746	0.264013
GOTERM_BP_FAT	GO:0032270~positive regulation of cellular protein metabolic process	9	8.10811	0.000184239	794781, 809326, 818676, 826111, 814479, 790215, 817654, 779157, 804233	93	233	13528	5.61872	0.233188	0.00696285	0.304199
GOTERM_BP_FAT	GO:0051963~regulation of synaptogenesis	4	3.6036	0.000230669	809326, 818676, 790215, 779157	93	18	13528	32.325	0.282823	0.00848768	0.380722
GOTERM_BP_FAT	GO:0051247~positive regulation of protein metabolic process	9	8.10811	0.000245244	794781, 809326, 818676, 826111, 814479, 790215, 817654, 779157, 804233	93	243	13528	5.3875	0.297732	0.00879709	0.404733
GOTERM_BP_FAT	GO:0044057~regulation of system process	10	9.00901	0.000248365	809326, 825519, 818676, 826111, 811688, 780030, 791615, 790215, 779157, 804233	93	309	13528	4.70752	0.300884	0.00869221	0.409873
GOTERM_BP_FAT	GO:0022604~regulation of cell morphogenesis	7	6.30631	0.000265264	775740, 778543, 794878, 783768, 791411, 819944, 804233	93	131	13528	7.7728	0.317707	0.009061	0.437704
GOTERM_BP_FAT	GO:0050807~regulation of synapse organization	4	3.6036	0.000370453	809326, 818676, 790215, 779157	93	21	13528	27.7071	0.413699	0.01234	0.610774
GOTERM_BP_FAT	GO:0044087~regulation of cellular component biogenesis	7	6.30631	0.0004091	809326, 804583, 818676, 811688, 790215, 817654, 779157	93	142	13528	7.17068	0.445469	0.0133114	0.674289
GOTERM_BP_FAT	GO:0006916~anti-apoptosis	8	7.20721	0.000503019	809326, 818676, 792654, 791615, 790215, 817654, 779157, 804233	93	206	13528	5.64902	0.515692	0.0159827	0.828486
GOTERM_BP_FAT	GO:0002526~acute inflammatory response	6	5.40541	0.000538134	794018, 794781, 801761, 780030, 787908, 803569	93	98	13528	8.90586	0.5396	0.0167208	0.88608
GOTERM_BP_FAT	GO:0050803~regulation of synapse structure and activity	4	3.6036	0.000555494	809326, 818676, 790215, 779157	93	24	13528	24.2437	0.550981	0.0168917	0.914541
GOTERM_BP_FAT	GO:0016477~cell migration	9	8.10811	0.000574157	795963, 775692, 823371, 800485, 784977, 814479, 794878, 783768, 817654	93	276	13528	4.74334	0.562902	0.0170938	0.94513
GOTERM_BP_FAT	GO:0048742~regulation of skeletal muscle fiber development	4	3.6036	0.000628146	809326, 818676, 790215, 779157	93	25	13528	23.274	0.595637	0.0183088	1.03357
GOTERM_BP_FAT	GO:0043277~apoptotic cell clearance	3	2.7027	0.000674168	826073, 817654, 820867	93	6	13528	72.7312	0.6216	0.0192484	1.1089
GOTERM_BP_FAT	GO:0032101~regulation of response to external stimulus	7	6.30631	0.000743885	794018, 794781, 826111, 801761, 817654, 787908, 804233	93	159	13528	6.404	0.657792	0.0208067	1.22291
GOTERM_BP_FAT	GO:0030182~neuron differentiation	11	9.90991	0.000768882	795963, 775740, 809326, 818676, 800485, 788771, 811688, 783768, 791615, 790215, 779157	93	438	13528	3.65316	0.669909	0.0210895	1.26376
GOTERM_BP_FAT	GO:0007411~axon guidance	6	5.40541	0.000802998	809326, 818676, 788771, 783768, 790215, 779157	93	107	13528	8.15677	0.685756	0.0216044	1.31949
GOTERM_BP_FAT	GO:0007568~aging	6	5.40541	0.000909845	800376, 814479, 791615, 826073, 803569, 810395	93	110	13528	7.93431	0.730634	0.0239978	1.49382
GOTERM_BP_FAT	GO:0048167~regulation of synaptic plasticity	5	4.5045	0.000931977	809326, 818676, 790215, 779157, 804233	93	64	13528	11.3642	0.739097	0.0241332	1.52989
GOTERM_BP_FAT	GO:0045807~positive regulation of endocytosis	4	3.6036	0.000978504	794018, 826111, 801761, 784099	93	29	13528	20.0638	0.756031	0.0248767	1.60569
GOTERM_BP_FAT	GO:0048641~regulation of skeletal muscle tissue development	4	3.6036	0.000978504	809326, 818676, 790215, 779157	93	29	13528	20.0638	0.756031	0.0248767	1.60569
GOTERM_BP_FAT	GO:0042981~regulation of apoptosis	15	13.5135	0.00101767	818836, 794781, 809292, 792654, 790215, 779157, 809326, 818676, 784611, 791615, 787982, 817654, 820495, 819944, 804233	93	804	13528	2.71385	0.769433	0.0254121	1.66946
GOTERM_BP_FAT	GO:0043067~regulation of programmed cell death	15	13.5135	0.0011194	818836, 794781, 809292, 792654, 790215, 779157, 809326, 818676, 784611, 791615, 787982, 817654, 820495, 819944, 804233	93	812	13528	2.68711	0.800903	0.0274434	1.8349
GOTERM_BP_FAT	GO:0051674~localization of cell	9	8.10811	0.00114593	795963, 775692, 823371, 800485, 784977, 814479, 794878, 783768, 817654	93	307	13528	4.26437	0.808379	0.0276155	1.878
GOTERM_BP_FAT	GO:0048870~cell motility	9	8.10811	0.00114593	795963, 775692, 823371, 800485, 784977, 814479, 794878, 783768, 817654	93	307	13528	4.26437	0.808379	0.0276155	1.878
GOTERM_BP_FAT	GO:0010941~regulation of cell death	15	13.5135	0.00115971	818836, 794781, 809292, 792654, 790215, 779157, 809326, 818676, 784611, 791615, 787982, 817654, 820495, 819944, 804233	93	815	13528	2.67722	0.812149	0.0274837	1.90036
GOTERM_BP_FAT	GO:0007229~integrin-mediated signaling pathway	5	4.5045	0.00130387	775692, 826111, 784977, 794878, 820867	93	70	13528	10.3902	0.847427	0.0303513	2.13422
GOTERM_BP_FAT	GO:0051153~regulation of striated muscle cell differentiation	4	3.6036	0.00130881	809326, 818676, 790215, 779157	93	32	13528	18.1828	0.84851	0.0299807	2.14223
GOTERM_BP_FAT	GO:0050806~positive regulation of synaptic transmission	4	3.6036	0.0015636	809326, 818676, 790215, 779157	93	34	13528	17.1132	0.895117	0.0351593	2.55421
GOTERM_BP_FAT	GO:0009719~response to endogenous stimulus	10	9.00901	0.0017132	818352, 826111, 784511, 801761, 822682, 817654, 820495, 787908, 784099, 810395	93	405	13528	3.59166	0.915486	0.0378711	2.79534
GOTERM_BP_FAT	GO:0050727~regulation of inflammatory response	5	4.5045	0.00176885	794018, 826111, 801761, 787908, 804233	93	76	13528	9.56989	0.922009	0.0384885	2.8849
GOTERM_BP_FAT	GO:0010647~positive regulation of cell communication	9	8.10811	0.00177694	809326, 818676, 826111, 814479, 790215, 817654, 779157, 791411, 813535	93	329	13528	3.97921	0.922915	0.0380868	2.89792
GOTERM_BP_FAT	GO:0051960~regulation of nervous system development	7	6.30631	0.00196163	809326, 818676, 780030, 790215, 779157, 819944, 804233	93	192	13528	5.30332	0.940957	0.0413518	3.19454
GOTERM_BP_FAT	GO:0001666~response to hypoxia	6	5.40541	0.00218487	818276, 826111, 814479, 780030, 817654, 803569	93	134	13528	6.51324	0.957227	0.0452929	3.55196
GOTERM_BP_FAT	GO:0040008~regulation of growth	9	8.10811	0.00222212	775692, 809326, 818676, 809797, 791615, 790215, 779157, 819944, 804233	93	341	13528	3.83918	0.959467	0.0453957	3.61146
GOTERM_BP_FAT	GO:0051147~regulation of muscle cell differentiation	4	3.6036	0.00233018	809326, 818676, 790215, 779157	93	39	13528	14.9192	0.965324	0.0468894	3.78393
GOTERM_BP_FAT	GO:0050804~regulation of synaptic transmission	6	5.40541	0.00233066	809326, 818676, 811688, 790215, 779157, 804233	93	136	13528	6.41746	0.965348	0.0462538	3.78469
GOTERM_BP_FAT	GO:0009266~response to temperature stimulus	5	4.5045	0.00244378	795593, 791615, 822682, 821489, 817654	93	83	13528	8.76279	0.970572	0.0477897	3.96492
GOTERM_BP_FAT	GO:0006915~apoptosis	12	10.8108	0.00252031	818836, 794781, 809326, 809292, 818676, 784611, 791615, 787982, 790215, 817654, 779157, 819944	93	602	13528	2.89958	0.973652	0.0485927	4.08667
GOTERM_BP_FAT	GO:0060284~regulation of cell development	7	6.30631	0.002723	809326, 818676, 790215, 779157, 791411, 819944, 804233	93	205	13528	4.96701	0.980341	0.0517122	4.40842
GOTERM_BP_FAT	GO:0070482~response to oxygen levels	6	5.40541	0.00272601	818276, 826111, 814479, 780030, 817654, 803569	93	141	13528	6.18989	0.980426	0.0510956	4.41319
GOTERM_BP_FAT	GO:0043085~positive regulation of catalytic activity	11	9.90991	0.00275773	818836, 794781, 809326, 818676, 826111, 791615, 826073, 790215, 817654, 779157, 804233	93	520	13528	3.07709	0.981303	0.051013	4.46344
GOTERM_BP_FAT	GO:0043066~negative regulation of apoptosis	9	8.10811	0.00279907	809326, 818676, 792654, 791615, 790215, 817654, 820495, 779157, 804233	93	354	13528	3.6982	0.982387	0.051104	4.52891
GOTERM_BP_FAT	GO:0012501~programmed cell death	12	10.8108	0.00282616	818836, 794781, 809326, 809292, 818676, 784611, 791615, 787982, 790215, 817654, 779157, 819944	93	611	13528	2.85687	0.983063	0.050942	4.57178
GOTERM_BP_FAT	GO:0043069~negative regulation of programmed cell death	9	8.10811	0.00304988	809326, 818676, 792654, 791615, 790215, 817654, 820495, 779157, 804233	93	359	13528	3.64669	0.987742	0.0541926	4.92516
GOTERM_BP_FAT	GO:0060548~negative regulation of cell death	9	8.10811	0.00310208	809326, 818676, 792654, 791615, 790215, 817654, 820495, 779157, 804233	93	360	13528	3.63656	0.988633	0.0544259	5.00745
GOTERM_BP_FAT	GO:0009725~response to hormone stimulus	9	8.10811	0.00348733	818352, 826111, 784511, 801761, 822682, 817654, 787908, 784099, 810395	93	367	13528	3.5672	0.993487	0.0602567	5.61262
GOTERM_BP_FAT	GO:0060627~regulation of vesicle-mediated transport	5	4.5045	0.004132	794018, 826111, 801761, 811688, 784099	93	96	13528	7.57616	0.997437	0.0701786	6.6172
GOTERM_BP_FAT	GO:0006909~phagocytosis	4	3.6036	0.00422003	826073, 817654, 820867, 784099	93	48	13528	12.1219	0.997743	0.0707903	6.75359
GOTERM_BP_FAT	GO:0031589~cell-substrate adhesion	5	4.5045	0.00444719	775692, 823371, 826111, 784977, 820867	93	98	13528	7.42155	0.998376	0.0736106	7.10469
GOTERM_BP_FAT	GO:0016202~regulation of striated muscle tissue development	4	3.6036	0.00473569	809326, 818676, 790215, 779157	93	50	13528	11.637	0.99893	0.0773217	7.54881
GOTERM_BP_FAT	GO:0048634~regulation of muscle development	4	3.6036	0.00500717	809326, 818676, 790215, 779157	93	51	13528	11.4088	0.999278	0.0806699	7.96489
GOTERM_BP_FAT	GO:0010498~proteasomal protein catabolic process	5	4.5045	0.00512545	818836, 809326, 818676, 790215, 779157	93	102	13528	7.13051	0.999392	0.0815908	8.14563
GOTERM_BP_FAT	GO:0043161~proteasomal ubiquitin-dependent protein catabolic process	5	4.5045	0.00512545	818836, 809326, 818676, 790215, 779157	93	102	13528	7.13051	0.999392	0.0815908	8.14563
GOTERM_BP_FAT	GO:0031532~actin cytoskeleton reorganization	3	2.7027	0.00515981	804583, 794878, 813535	93	16	13528	27.2742	0.999421	0.0812218	8.19806
GOTERM_BP_FAT	GO:0051241~negative regulation of multicellular organismal process	6	5.40541	0.00519049	794781, 801761, 811688, 791615, 817654, 804233	93	164	13528	5.32179	0.999446	0.080806	8.24486
GOTERM_BP_FAT	GO:0006997~nucleus organization	4	3.6036	0.00528786	795963, 809292, 791615, 787982	93	52	13528	11.1894	0.999519	0.0813859	8.39325
GOTERM_BP_FAT	GO:0030198~extracellular matrix organization	5	4.5045	0.00548923	825565, 823371, 814479, 780448, 804645	93	104	13528	6.99338	0.999641	0.0834716	8.6994
GOTERM_BP_FAT	GO:0008360~regulation of cell shape	4	3.6036	0.00587723	775740, 778543, 794878, 783768	93	54	13528	10.775	0.999795	0.0881929	9.28659
GOTERM_BP_FAT	GO:0051789~response to protein stimulus	5	4.5045	0.00606666	818836, 792654, 826111, 821489, 820495	93	107	13528	6.79731	0.999844	0.0899784	9.57198
GOTERM_BP_FAT	GO:0044093~positive regulation of molecular function	11	9.90991	0.0063789	818836, 794781, 809326, 818676, 826111, 791615, 826073, 790215, 817654, 779157, 804233	93	586	13528	2.73052	0.999901	0.093442	10.0405
GOTERM_BP_FAT	GO:0001568~blood vessel development	7	6.30631	0.00647491	775692, 814479, 794878, 817654, 819944, 820867, 804233	93	245	13528	4.15607	0.999914	0.0938347	10.1842
GOTERM_BP_FAT	GO:0009408~response to heat	4	3.6036	0.00650443	795593, 791615, 822682, 817654	93	56	13528	10.3902	0.999918	0.0933086	10.2283
GOTERM_BP_FAT	GO:0001937~negative regulation of endothelial cell proliferation	3	2.7027	0.00652094	814479, 817654, 804233	93	18	13528	24.2437	0.99992	0.0926166	10.2529
GOTERM_BP_FAT	GO:0006309~DNA fragmentation involved in apoptosis	3	2.7027	0.00725604	809292, 791615, 787982	93	19	13528	22.9677	0.999972	0.101548	11.3447
GOTERM_BP_FAT	GO:0001944~vasculature development	7	6.30631	0.00725971	775692, 814479, 794878, 817654, 819944, 820867, 804233	93	251	13528	4.05672	0.999972	0.100624	11.3501
GOTERM_BP_FAT	GO:0006412~translation	8	7.20721	0.00730897	809326, 785252, 818676, 822682, 790215, 782385, 820495, 779157	93	331	13528	3.51571	0.999974	0.100314	11.4228
GOTERM_BP_FAT	GO:0001503~ossification	5	4.5045	0.0078008	775692, 825565, 795829, 784511, 801761	93	115	13528	6.32445	0.999987	0.105717	12.1456
GOTERM_BP_FAT	GO:0051130~positive regulation of cellular component organization	6	5.40541	0.00781539	794018, 804583, 826111, 801761, 791411, 784099	93	181	13528	4.82196	0.999988	0.104923	12.167
GOTERM_BP_FAT	GO:0030100~regulation of endocytosis	4	3.6036	0.00824182	794018, 826111, 801761, 784099	93	61	13528	9.53852	0.999993	0.109332	12.7891
GOTERM_BP_FAT	GO:0016567~protein ubiquitination	5	4.5045	0.00877858	818836, 809326, 818676, 790215, 779157	93	119	13528	6.11186	0.999997	0.115003	13.5663
GOTERM_BP_FAT	GO:0031400~negative regulation of protein modification process	5	4.5045	0.00877858	809326, 818676, 814479, 790215, 779157	93	119	13528	6.11186	0.999997	0.115003	13.5663
GOTERM_BP_FAT	GO:0030968~endoplasmic reticulum unfolded protein response	3	2.7027	0.00883275	818836, 821489, 820495	93	21	13528	20.7803	0.999997	0.114637	13.6443
GOTERM_BP_FAT	GO:0034620~cellular response to unfolded protein	3	2.7027	0.00883275	818836, 821489, 820495	93	21	13528	20.7803	0.999997	0.114637	13.6443
GOTERM_BP_FAT	GO:0043065~positive regulation of apoptosis	9	8.10811	0.00886253	809326, 809292, 818676, 784611, 791615, 787982, 790215, 779157, 804233	93	430	13528	3.04456	0.999997	0.113981	13.6872
GOTERM_BP_FAT	GO:0031401~positive regulation of protein modification process	6	5.40541	0.00892931	794781, 809326, 818676, 814479, 790215, 779157	93	187	13528	4.66724	0.999998	0.113783	13.7833
GOTERM_BP_FAT	GO:0043068~positive regulation of programmed cell death	9	8.10811	0.00922075	809326, 809292, 818676, 784611, 791615, 787982, 790215, 779157, 804233	93	433	13528	3.02347	0.999998	0.116266	14.2016
GOTERM_BP_FAT	GO:0008219~cell death	12	10.8108	0.00941609	818836, 794781, 809326, 809292, 818676, 784611, 791615, 787982, 790215, 817654, 779157, 819944	93	719	13528	2.42774	0.999999	0.117567	14.4809
GOTERM_BP_FAT	GO:0010942~positive regulation of cell death	9	8.10811	0.00946552	809326, 809292, 818676, 784611, 791615, 787982, 790215, 779157, 804233	93	435	13528	3.00957	0.999999	0.11714	14.5514
GOTERM_BP_FAT	GO:0019226~transmission of nerve impulse	8	7.20721	0.0097765	795963, 809326, 795339, 818676, 791615, 790215, 779157, 804233	93	350	13528	3.32485	0.999999	0.119744	14.9939
GOTERM_BP_FAT	GO:0031145~anaphase-promoting complex-dependent proteasomal ubiquitin-dependent protein catabolic process	4	3.6036	0.00981014	809326, 818676, 790215, 779157	93	65	13528	8.95153	0.999999	0.119126	15.0416
GOTERM_BP_FAT	GO:0051436~negative regulation of ubiquitin-protein ligase activity during mitotic cell cycle	4	3.6036	0.00981014	809326, 818676, 790215, 779157	93	65	13528	8.95153	0.999999	0.119126	15.0416
GOTERM_BP_FAT	GO:0060348~bone development	5	4.5045	0.00983335	775692, 825565, 795829, 784511, 801761	93	123	13528	5.9131	0.999999	0.118401	15.0745
GOTERM_BP_FAT	GO:0016265~death	12	10.8108	0.00988868	818836, 794781, 809326, 809292, 818676, 784611, 791615, 787982, 790215, 817654, 779157, 819944	93	724	13528	2.41098	0.999999	0.118049	15.153
GOTERM_BP_FAT	GO:0006921~cell structure disassembly during apoptosis	3	2.7027	0.0105481	809292, 791615, 787982	93	23	13528	18.9734	1	0.124425	16.0825
GOTERM_BP_FAT	GO:0051444~negative regulation of ubiquitin-protein ligase activity	4	3.6036	0.010655	809326, 818676, 790215, 779157	93	67	13528	8.68432	1	0.124597	16.2323
GOTERM_BP_FAT	GO:0051352~negative regulation of ligase activity	4	3.6036	0.010655	809326, 818676, 790215, 779157	93	67	13528	8.68432	1	0.124597	16.2323
GOTERM_BP_FAT	GO:0051437~positive regulation of ubiquitin-protein ligase activity during mitotic cell cycle	4	3.6036	0.0110927	809326, 818676, 790215, 779157	93	68	13528	8.55661	1	0.128365	16.843
GOTERM_BP_FAT	GO:0016337~cell-cell adhesion	7	6.30631	0.0112835	775692, 802187, 784977, 811688, 794878, 782974, 813535	93	276	13528	3.68926	1	0.129403	17.1079
GOTERM_BP_FAT	GO:0051443~positive regulation of ubiquitin-protein ligase activity	4	3.6036	0.0119992	809326, 818676, 790215, 779157	93	70	13528	8.31214	1	0.135997	18.0944
GOTERM_BP_FAT	GO:0006986~response to unfolded protein	4	3.6036	0.0124679	818836, 792654, 821489, 820495	93	71	13528	8.19506	1	0.13986	18.7345
GOTERM_BP_FAT	GO:0051439~regulation of ubiquitin-protein ligase activity during mitotic cell cycle	4	3.6036	0.0124679	809326, 818676, 790215, 779157	93	71	13528	8.19506	1	0.13986	18.7345
GOTERM_BP_FAT	GO:0032446~protein modification by small protein conjugation	5	4.5045	0.0124994	818836, 809326, 818676, 790215, 779157	93	132	13528	5.50994	1	0.139116	18.7774
GOTERM_BP_FAT	GO:0000737~DNA catabolic process, endonucleolytic	3	2.7027	0.0133724	809292, 791615, 787982	93	26	13528	16.7841	1	0.147015	19.9565
GOTERM_BP_FAT	GO:0030262~apoptotic nuclear changes	3	2.7027	0.0133724	809292, 791615, 787982	93	26	13528	16.7841	1	0.147015	19.9565
GOTERM_BP_FAT	GO:0051351~positive regulation of ligase activity	4	3.6036	0.0134366	809326, 818676, 790215, 779157	93	73	13528	7.97054	1	0.146562	20.0426
GOTERM_BP_FAT	GO:0022617~extracellular matrix disassembly	2	1.8018	0.0135557	823371, 814479	93	2	13528	145.462	1	0.146669	20.202
GOTERM_BP_FAT	GO:0031397~negative regulation of protein ubiquitination	4	3.6036	0.0139366	809326, 818676, 790215, 779157	93	74	13528	7.86283	1	0.149381	20.71
GOTERM_BP_FAT	GO:0007517~muscle organ development	6	5.40541	0.0144843	825565, 784977, 778146, 814479, 783768, 820625	93	211	13528	4.13637	1	0.153682	21.435
GOTERM_BP_FAT	GO:0048514~blood vessel morphogenesis	6	5.40541	0.0144843	775692, 814479, 794878, 817654, 819944, 804233	93	211	13528	4.13637	1	0.153682	21.435
GOTERM_BP_FAT	GO:0007268~synaptic transmission	7	6.30631	0.0159549	795963, 809326, 795339, 818676, 790215, 779157, 804233	93	298	13528	3.4169	1	0.166808	23.3513
GOTERM_BP_FAT	GO:0051438~regulation of ubiquitin-protein ligase activity	4	3.6036	0.0160418	809326, 818676, 790215, 779157	93	78	13528	7.45961	1	0.166449	23.4631
GOTERM_BP_FAT	GO:0032368~regulation of lipid transport	3	2.7027	0.017587	817654, 820867, 804233	93	30	13528	14.5462	1	0.179798	25.4264
GOTERM_BP_FAT	GO:0051340~regulation of ligase activity	4	3.6036	0.0177318	809326, 818676, 790215, 779157	93	81	13528	7.18333	1	0.179887	25.6079
GOTERM_BP_FAT	GO:0051050~positive regulation of transport	6	5.40541	0.0179803	794018, 794781, 826111, 801761, 784099, 804233	93	223	13528	3.91379	1	0.180928	25.9185
GOTERM_BP_FAT	GO:0001525~angiogenesis	5	4.5045	0.0182988	775692, 814479, 794878, 817654, 819944	93	148	13528	4.91427	1	0.182588	26.3148
GOTERM_BP_FAT	GO:0006879~cellular iron ion homeostasis	3	2.7027	0.0187177	780030, 791615, 803569	93	31	13528	14.077	1	0.185125	26.833
GOTERM_BP_FAT	GO:0030005~cellular di-, tri-valent inorganic cation homeostasis	6	5.40541	0.0192597	794781, 780030, 791615, 813535, 804233, 803569	93	227	13528	3.84482	1	0.188713	27.4983
GOTERM_BP_FAT	GO:0009891~positive regulation of biosynthetic process	11	9.90991	0.019439	794781, 809326, 818676, 826111, 784511, 814479, 790215, 817654, 779157, 791411, 804233	93	695	13528	2.30228	1	0.18904	27.7172
GOTERM_BP_FAT	GO:0031398~positive regulation of protein ubiquitination	4	3.6036	0.0195175	809326, 818676, 790215, 779157	93	84	13528	6.92678	1	0.188478	27.8127
GOTERM_BP_FAT	GO:0001936~regulation of endothelial cell proliferation	3	2.7027	0.0198783	814479, 817654, 804233	93	32	13528	13.6371	1	0.190381	28.2508
GOTERM_BP_FAT	GO:0045541~negative regulation of cholesterol biosynthetic process	2	1.8018	0.0202652	791615, 804233	93	3	13528	96.9749	1	0.192477	28.7176
GOTERM_BP_FAT	GO:0007569~cell aging	3	2.7027	0.0210684	800376, 814479, 791615	93	33	13528	13.2239	1	0.198081	29.6777
GOTERM_BP_FAT	GO:0001501~skeletal system development	7	6.30631	0.0215314	775692, 800376, 825565, 795829, 784511, 801761, 814755	93	319	13528	3.19196	1	0.200717	30.2257
GOTERM_BP_FAT	GO:0006917~induction of apoptosis	7	6.30631	0.021826	809326, 809292, 818676, 787982, 790215, 779157, 804233	93	320	13528	3.18199	1	0.201906	30.5723
GOTERM_BP_FAT	GO:0012502~induction of programmed cell death	7	6.30631	0.0221234	809326, 809292, 818676, 787982, 790215, 779157, 804233	93	321	13528	3.17208	1	0.2031	30.9205
GOTERM_BP_FAT	GO:0034976~response to endoplasmic reticulum stress	3	2.7027	0.0222874	818836, 821489, 820495	93	34	13528	12.8349	1	0.203182	31.1118
GOTERM_BP_FAT	GO:0031344~regulation of cell projection organization	4	3.6036	0.022707	804583, 826111, 819944, 804233	93	89	13528	6.53763	1	0.205345	31.599
GOTERM_BP_FAT	GO:0007160~cell-matrix adhesion	4	3.6036	0.022707	775692, 826111, 784977, 820867	93	89	13528	6.53763	1	0.205345	31.599
GOTERM_BP_FAT	GO:0006954~inflammatory response	7	6.30631	0.0233404	794018, 794781, 801761, 780030, 817654, 787908, 803569	93	325	13528	3.13304	1	0.209196	32.3283
GOTERM_BP_FAT	GO:0055066~di-, tri-valent inorganic cation homeostasis	6	5.40541	0.0234537	794781, 780030, 791615, 813535, 804233, 803569	93	239	13528	3.65177	1	0.20883	32.458
GOTERM_BP_FAT	GO:0050885~neuromuscular process controlling balance	3	2.7027	0.023535	795963, 783768, 820495	93	35	13528	12.4682	1	0.208215	32.5509
GOTERM_BP_FAT	GO:0006984~ER-nuclear signaling pathway	3	2.7027	0.023535	818836, 821489, 820495	93	35	13528	12.4682	1	0.208215	32.5509
GOTERM_BP_FAT	GO:0070647~protein modification by small protein conjugation or removal	5	4.5045	0.0235902	818836, 809326, 818676, 790215, 779157	93	160	13528	4.5457	1	0.207401	32.6139
GOTERM_BP_FAT	GO:0006952~defense response	10	9.00901	0.0237986	794018, 794781, 795339, 792654, 784977, 801761, 780030, 817654, 787908, 803569	93	615	13528	2.36524	1	0.207801	32.8513
GOTERM_BP_FAT	GO:0006511~ubiquitin-dependent protein catabolic process	6	5.40541	0.0245877	818836, 809326, 818676, 790215, 779157, 791411	93	242	13528	3.6065	1	0.212709	33.7432
GOTERM_BP_FAT	GO:0030193~regulation of blood coagulation	3	2.7027	0.0248108	794781, 817654, 804233	93	36	13528	12.1219	1	0.213181	33.9933
GOTERM_BP_FAT	GO:0010927~cellular component assembly involved in morphogenesis	3	2.7027	0.0248108	795963, 784977, 783768	93	36	13528	12.1219	1	0.213181	33.9933
GOTERM_BP_FAT	GO:0055072~iron ion homeostasis	3	2.7027	0.0248108	780030, 791615, 803569	93	36	13528	12.1219	1	0.213181	33.9933
GOTERM_BP_FAT	GO:0043062~extracellular structure organization	5	4.5045	0.0250438	825565, 823371, 814479, 780448, 804645	93	163	13528	4.46204	1	0.213723	34.2537
GOTERM_BP_FAT	GO:0044265~cellular macromolecule catabolic process	11	9.90991	0.0251961	818836, 809326, 809292, 818676, 794878, 791615, 787982, 790215, 779157, 791411, 804233	93	725	13528	2.20702	1	0.213643	34.4232
GOTERM_BP_FAT	GO:0010955~negative regulation of protein maturation by peptide bond cleavage	2	1.8018	0.0269296	817654, 787908	93	4	13528	72.7312	1	0.225423	36.325
GOTERM_BP_FAT	GO:0010648~negative regulation of cell communication	6	5.40541	0.0269605	814479, 801761, 811688, 826073, 817654, 791411	93	248	13528	3.51925	1	0.224375	36.3585
GOTERM_BP_FAT	GO:0017015~regulation of transforming growth factor beta receptor signaling pathway	3	2.7027	0.0288025	814479, 817654, 791411	93	39	13528	11.1894	1	0.23659	38.3214
GOTERM_BP_FAT	GO:0030003~cellular cation homeostasis	6	5.40541	0.0294753	794781, 780030, 791615, 813535, 804233, 803569	93	254	13528	3.43612	1	0.240126	39.0242
GOTERM_BP_FAT	GO:0031396~regulation of protein ubiquitination	4	3.6036	0.0306637	809326, 818676, 790215, 779157	93	100	13528	5.81849	1	0.247262	40.247
GOTERM_BP_FAT	GO:0006414~translational elongation	4	3.6036	0.0314509	809326, 818676, 790215, 779157	93	101	13528	5.76089	1	0.251448	41.0443
GOTERM_BP_FAT	GO:0050818~regulation of coagulation	3	2.7027	0.0315964	794781, 817654, 804233	93	41	13528	10.6436	1	0.251106	41.1907
GOTERM_BP_FAT	GO:0006457~protein folding	5	4.5045	0.0325354	793612, 781129, 781245, 821489, 820495	93	177	13528	4.10911	1	0.256246	42.1264
GOTERM_BP_FAT	GO:0010557~positive regulation of macromolecule biosynthetic process	10	9.00901	0.0335231	794781, 809326, 818676, 826111, 784511, 814479, 790215, 817654, 779157, 791411	93	654	13528	2.2242	1	0.261624	43.0956
GOTERM_BP_FAT	GO:0022402~cell cycle process	9	8.10811	0.0382501	795963, 809326, 818676, 784977, 794878, 783768, 790215, 817654, 779157	93	565	13528	2.3171	1	0.291629	47.5268
GOTERM_BP_FAT	GO:0033554~cellular response to stress	9	8.10811	0.038588	818836, 809292, 800485, 791615, 787982, 822682, 821489, 817654, 820495	93	566	13528	2.31301	1	0.292326	47.8308
GOTERM_BP_FAT	GO:0009057~macromolecule catabolic process	11	9.90991	0.0390939	818836, 809326, 809292, 818676, 794878, 791615, 787982, 790215, 779157, 791411, 804233	93	781	13528	2.04877	1	0.294094	48.2829
GOTERM_BP_FAT	GO:0019725~cellular homeostasis	8	7.20721	0.0393019	794781, 809292, 780030, 791615, 787982, 813535, 804233, 803569	93	466	13528	2.49721	1	0.293939	48.4676
GOTERM_BP_FAT	GO:0009628~response to abiotic stimulus	7	6.30631	0.0393469	795593, 818352, 826111, 791615, 822682, 821489, 817654	93	368	13528	2.76695	1	0.292752	48.5076
GOTERM_BP_FAT	GO:0010953~regulation of protein maturation by peptide bond cleavage	2	1.8018	0.0401241	817654, 787908	93	6	13528	48.4875	1	0.296195	49.192
GOTERM_BP_FAT	GO:0070613~regulation of protein processing	2	1.8018	0.0401241	817654, 787908	93	6	13528	48.4875	1	0.296195	49.192
GOTERM_BP_FAT	GO:0043086~negative regulation of catalytic activity	6	5.40541	0.0404686	809326, 818676, 814479, 790215, 779157, 804233	93	277	13528	3.15081	1	0.296887	49.4928
GOTERM_BP_FAT	GO:0008624~induction of apoptosis by extracellular signals	4	3.6036	0.0408032	809326, 818676, 790215, 779157	93	112	13528	5.19508	1	0.297508	49.7832
GOTERM_BP_FAT	GO:0042060~wound healing	5	4.5045	0.0412112	794781, 826111, 814479, 811688, 783768	93	191	13528	3.80792	1	0.298575	50.1351
GOTERM_BP_FAT	GO:0031328~positive regulation of cellular biosynthetic process	10	9.00901	0.0430134	809326, 818676, 826111, 784511, 814479, 790215, 817654, 779157, 791411, 804233	93	685	13528	2.12354	1	0.30812	51.6625
GOTERM_BP_FAT	GO:0031667~response to nutrient levels	5	4.5045	0.045295	792654, 826111, 791615, 787908, 803569	93	197	13528	3.69194	1	0.320294	53.5332
GOTERM_BP_FAT	GO:0055080~cation homeostasis	6	5.40541	0.0453681	794781, 780030, 791615, 813535, 804233, 803569	93	286	13528	3.05166	1	0.319216	53.592
GOTERM_BP_FAT	GO:0051174~regulation of phosphorus metabolic process	8	7.20721	0.0470206	794781, 826111, 814479, 784611, 791615, 826073, 817654, 804233	93	485	13528	2.39938	1	0.327384	54.9026
GOTERM_BP_FAT	GO:0019220~regulation of phosphate metabolic process	8	7.20721	0.0470206	794781, 826111, 814479, 784611, 791615, 826073, 817654, 804233	93	485	13528	2.39938	1	0.327384	54.9026
GOTERM_BP_FAT	GO:0030705~cytoskeleton-dependent intracellular transport	3	2.7027	0.0487093	795963, 794878, 783768	93	52	13528	8.39206	1	0.335584	56.2059
GOTERM_BP_FAT	GO:0030162~regulation of proteolysis	3	2.7027	0.0504007	817654, 787908, 804233	93	53	13528	8.23372	1	0.343627	57.4758
GOTERM_BP_FAT	GO:0006898~receptor-mediated endocytosis	3	2.7027	0.0504007	795829, 826073, 804233	93	53	13528	8.23372	1	0.343627	57.4758
GOTERM_BP_FAT	GO:0031399~regulation of protein modification process	6	5.40541	0.0506094	794781, 809326, 818676, 814479, 790215, 779157	93	295	13528	2.95856	1	0.343242	57.63
GOTERM_BP_FAT	GO:0010035~response to inorganic substance	5	4.5045	0.0510813	791615, 817654, 787908, 804233, 803569	93	205	13528	3.54786	1	0.344327	57.9769
GOTERM_BP_FAT	GO:0010714~positive regulation of collagen metabolic process	2	1.8018	0.0531416	794781, 826111	93	8	13528	36.3656	1	0.354125	59.4603
GOTERM_BP_FAT	GO:0045939~negative regulation of steroid metabolic process	2	1.8018	0.0531416	791615, 804233	93	8	13528	36.3656	1	0.354125	59.4603
GOTERM_BP_FAT	GO:0032967~positive regulation of collagen biosynthetic process	2	1.8018	0.0531416	794781, 826111	93	8	13528	36.3656	1	0.354125	59.4603
GOTERM_BP_FAT	GO:0010894~negative regulation of steroid biosynthetic process	2	1.8018	0.0531416	791615, 804233	93	8	13528	36.3656	1	0.354125	59.4603
GOTERM_BP_FAT	GO:0060537~muscle tissue development	4	3.6036	0.0534594	825565, 784977, 814479, 783768	93	125	13528	4.6548	1	0.354291	59.6847
GOTERM_BP_FAT	GO:0010608~posttranscriptional regulation of gene expression	5	4.5045	0.055676	788227, 826111, 822682, 782385, 817654	93	211	13528	3.44698	1	0.364642	61.2177
GOTERM_BP_FAT	GO:0048738~cardiac muscle tissue development	3	2.7027	0.057373	825565, 784977, 783768	93	57	13528	7.65591	1	0.372023	62.3542
GOTERM_BP_FAT	GO:0007507~heart development	5	4.5045	0.0588597	825565, 784977, 814479, 814755, 783768	93	215	13528	3.38285	1	0.378167	63.324
GOTERM_BP_FAT	GO:0043537~negative regulation of blood vessel endothelial cell migration	2	1.8018	0.0595847	817654, 804233	93	9	13528	32.325	1	0.380299	63.7883
GOTERM_BP_FAT	GO:0045540~regulation of cholesterol biosynthetic process	2	1.8018	0.0595847	791615, 804233	93	9	13528	32.325	1	0.380299	63.7883
GOTERM_BP_FAT	GO:0042493~response to drug	5	4.5045	0.0596707	818352, 826111, 791615, 812322, 810395	93	216	13528	3.36718	1	0.379143	63.843
GOTERM_BP_FAT	GO:0010605~negative regulation of macromolecule metabolic process	10	9.00901	0.0614774	809326, 818676, 814479, 795726, 822682, 790215, 817654, 779157, 820867, 787908	93	734	13528	1.98178	1	0.386715	64.9747
GOTERM_BP_FAT	GO:0045785~positive regulation of cell adhesion	3	2.7027	0.0628094	826111, 780448, 817654	93	60	13528	7.27312	1	0.391775	65.7876
GOTERM_BP_FAT	GO:0006308~DNA catabolic process	3	2.7027	0.0628094	809292, 791615, 787982	93	60	13528	7.27312	1	0.391775	65.7876
GOTERM_BP_FAT	GO:0009991~response to extracellular stimulus	5	4.5045	0.0629742	792654, 826111, 791615, 787908, 803569	93	220	13528	3.30596	1	0.39099	65.887
GOTERM_BP_FAT	GO:0009968~negative regulation of signal transduction	5	4.5045	0.063815	814479, 801761, 826073, 817654, 791411	93	221	13528	3.291	1	0.393542	66.3896
GOTERM_BP_FAT	GO:0010604~positive regulation of macromolecule metabolic process	11	9.90991	0.0654391	794781, 809326, 818676, 826111, 784511, 814479, 790215, 817654, 779157, 791411, 804233	93	857	13528	1.86708	1	0.399865	67.3408
GOTERM_BP_FAT	GO:0051293~establishment of spindle localization	2	1.8018	0.0659844	795963, 794878	93	10	13528	29.0925	1	0.400897	67.6545
GOTERM_BP_FAT	GO:0006911~phagocytosis, engulfment	2	1.8018	0.0659844	817654, 784099	93	10	13528	29.0925	1	0.400897	67.6545
GOTERM_BP_FAT	GO:0030194~positive regulation of blood coagulation	2	1.8018	0.0659844	794781, 817654	93	10	13528	29.0925	1	0.400897	67.6545
GOTERM_BP_FAT	GO:0051653~spindle localization	2	1.8018	0.0659844	795963, 794878	93	10	13528	29.0925	1	0.400897	67.6545
GOTERM_BP_FAT	GO:0050905~neuromuscular process	3	2.7027	0.0665271	795963, 783768, 820495	93	62	13528	7.0385	1	0.401906	67.9638
GOTERM_BP_FAT	GO:0030155~regulation of cell adhesion	4	3.6036	0.0666173	826111, 814479, 780448, 817654	93	137	13528	4.24708	1	0.400749	68.015
GOTERM_BP_FAT	GO:0006417~regulation of translation	4	3.6036	0.0666173	826111, 822682, 782385, 817654	93	137	13528	4.24708	1	0.400749	68.015
GOTERM_BP_FAT	GO:0007584~response to nutrient	4	3.6036	0.0701187	792654, 826111, 787908, 803569	93	140	13528	4.15607	1	0.415631	69.9421
GOTERM_BP_FAT	GO:0032103~positive regulation of response to external stimulus	3	2.7027	0.0703166	794018, 826111, 817654	93	64	13528	6.81855	1	0.414943	70.0477
GOTERM_BP_FAT	GO:0021537~telencephalon development	3	2.7027	0.0722375	795963, 801761, 783768	93	65	13528	6.71365	1	0.422157	71.0547
GOTERM_BP_FAT	GO:0042063~gliogenesis	3	2.7027	0.0722375	800485, 791615, 822682	93	65	13528	6.71365	1	0.422157	71.0547
GOTERM_BP_FAT	GO:0032965~regulation of collagen biosynthetic process	2	1.8018	0.0723411	794781, 826111	93	11	13528	26.4477	1	0.421026	71.1082
GOTERM_BP_FAT	GO:0043009~chordate embryonic development	6	5.40541	0.0750098	825565, 788227, 784977, 788771, 794878, 783768	93	331	13528	2.63678	1	0.431419	72.4522
GOTERM_BP_FAT	GO:0009792~embryonic development ending in birth or egg hatching	6	5.40541	0.0772898	825565, 788227, 784977, 788771, 794878, 783768	93	334	13528	2.6131	1	0.439861	73.5537
GOTERM_BP_FAT	GO:0044092~negative regulation of molecular function	6	5.40541	0.0772898	809326, 818676, 814479, 790215, 779157, 804233	93	334	13528	2.6131	1	0.439861	73.5537
GOTERM_BP_FAT	GO:0046907~intracellular transport	9	8.10811	0.078179	795963, 818836, 794781, 807973, 794878, 783768, 803417, 813535, 804233	93	657	13528	1.99264	1	0.442113	73.9719
GOTERM_BP_FAT	GO:0046688~response to copper ion	2	1.8018	0.078655	791615, 803569	93	12	13528	24.2437	1	0.442557	74.1933
GOTERM_BP_FAT	GO:0010712~regulation of collagen metabolic process	2	1.8018	0.078655	794781, 826111	93	12	13528	24.2437	1	0.442557	74.1933
GOTERM_BP_FAT	GO:0051656~establishment of organelle localization	3	2.7027	0.0800874	795963, 794878, 783768	93	69	13528	6.32445	1	0.44709	74.8487
GOTERM_BP_FAT	GO:0031099~regeneration	3	2.7027	0.0800874	794153, 800485, 809797	93	69	13528	6.32445	1	0.44709	74.8487
GOTERM_BP_FAT	GO:0044253~positive regulation of multicellular organismal metabolic process	2	1.8018	0.0849263	794781, 826111	93	13	13528	22.3788	1	0.46576	76.9491
GOTERM_BP_FAT	GO:0050820~positive regulation of coagulation	2	1.8018	0.0849263	794781, 817654	93	13	13528	22.3788	1	0.46576	76.9491
GOTERM_BP_FAT	GO:0030511~positive regulation of transforming growth factor beta receptor signaling pathway	2	1.8018	0.0849263	817654, 791411	93	13	13528	22.3788	1	0.46576	76.9491
GOTERM_BP_FAT	GO:0006937~regulation of muscle contraction	3	2.7027	0.0861412	825519, 826111, 791615	93	72	13528	6.06093	1	0.469105	77.45
GOTERM_BP_FAT	GO:0042127~regulation of cell proliferation	10	9.00901	0.0865115	781129, 797658, 823371, 826111, 784977, 814479, 817654, 791411, 784099, 804233	93	787	13528	1.84831	1	0.468978	77.6006
GOTERM_BP_FAT	GO:0010596~negative regulation of endothelial cell migration	2	1.8018	0.0911555	817654, 804233	93	14	13528	20.7803	1	0.485919	79.4109
GOTERM_BP_FAT	GO:0048844~artery morphogenesis	2	1.8018	0.0911555	814479, 804233	93	14	13528	20.7803	1	0.485919	79.4109
GOTERM_BP_FAT	GO:0007263~nitric oxide mediated signal transduction	2	1.8018	0.0911555	792654, 804233	93	14	13528	20.7803	1	0.485919	79.4109
GOTERM_BP_FAT	GO:0010769~regulation of cell morphogenesis involved in differentiation	3	2.7027	0.096524	791411, 819944, 804233	93	77	13528	5.66736	1	0.505011	81.3322
GOTERM_BP_FAT	GO:0002687~positive regulation of leukocyte migration	2	1.8018	0.0973427	826111, 817654	93	15	13528	19.395	1	0.506437	81.6099
GOTERM_BP_FAT	GO:0032369~negative regulation of lipid transport	2	1.8018	0.0973427	817654, 820867	93	15	13528	19.395	1	0.506437	81.6099
GOTERM_BP_FAT	GO:0051055~negative regulation of lipid biosynthetic process	2	1.8018	0.0973427	791615, 804233	93	15	13528	19.395	1	0.506437	81.6099
GOTERM_BP_FAT	GO:0042325~regulation of phosphorylation	7	6.30631	0.0975997	794781, 814479, 784611, 791615, 826073, 817654, 804233	93	466	13528	2.18506	1	0.505742	81.6963

## Sheet: Osteogenic BPfat
Category	Term	Count	%	PValue	Genes	List Total	Pop Hits	Pop Total	Fold Enrichment	Bonferroni	Benjamini	FDR
GOTERM_BP_FAT	GO:0006414~translational elongation	4	9.09091	0.00326617	777984, 814248, 801872, 772335	41	101	13528	13.0674	0.825702	0.825702	4.64342
GOTERM_BP_FAT	GO:0009125~nucleoside monophosphate catabolic process	2	4.54545	0.0263066	811418, 793194	41	9	13528	73.3225	0.999999	0.99919	32.1213
GOTERM_BP_FAT	GO:0007010~cytoskeleton organization	5	11.3636	0.0390226	825257, 793194, 798707, 822573, 822474	41	436	13528	3.78384	1	0.999163	43.9261
GOTERM_BP_FAT	GO:0030865~cortical cytoskeleton organization	2	4.54545	0.0406285	825257, 822573	41	14	13528	47.1359	1	0.996062	45.2727
GOTERM_BP_FAT	GO:0019915~lipid storage	2	4.54545	0.051938	798707, 797565	41	18	13528	36.6612	1	0.996641	53.9367
GOTERM_BP_FAT	GO:0006091~generation of precursor metabolites and energy	4	9.09091	0.0646942	802076, 792895, 794852, 803359	41	313	13528	4.21663	1	0.997401	62.1686
GOTERM_BP_FAT	GO:0015980~energy derivation by oxidation of organic compounds	3	6.81818	0.0674935	802076, 792895, 794852	41	144	13528	6.87398	1	0.99516	63.7813
GOTERM_BP_FAT	GO:0006869~lipid transport	3	6.81818	0.0683128	798707, 797565, 823216	41	145	13528	6.82658	1	0.991112	64.241
GOTERM_BP_FAT	GO:0000226~microtubule cytoskeleton organization	3	6.81818	0.0699612	793194, 798707, 822474	41	147	13528	6.7337	1	0.986477	65.1496
GOTERM_BP_FAT	GO:0032273~positive regulation of protein polymerization	2	4.54545	0.0714176	825257, 798707	41	25	13528	26.3961	1	0.980874	65.9344
GOTERM_BP_FAT	GO:0006412~translation	4	9.09091	0.0738531	777984, 814248, 801872, 772335	41	331	13528	3.98733	1	0.975875	67.2101
GOTERM_BP_FAT	GO:0006687~glycosphingolipid metabolic process	2	4.54545	0.0741683	797565, 823216	41	26	13528	25.3809	1	0.96759	67.372
GOTERM_BP_FAT	GO:0010876~lipid localization	3	6.81818	0.0783973	798707, 797565, 823216	41	157	13528	6.3048	1	0.96504	69.4723
GOTERM_BP_FAT	GO:0006664~glycolipid metabolic process	2	4.54545	0.0878033	797565, 823216	41	31	13528	21.2872	1	0.969963	73.7008
GOTERM_BP_FAT	GO:0031334~positive regulation of protein complex assembly	2	4.54545	0.0985701	825257, 798707	41	35	13528	18.8544	1	0.975136	77.869

## Sheet: Tenogenic BPfat
Category	Term	Count	%	PValue	Genes	List Total	Pop Hits	Pop Total	Fold Enrichment	Bonferroni	Benjamini	FDR
GOTERM_BP_FAT	GO:0006414~translational elongation	13	8.78378	3.33195e-10	825605, 796817, 799749, 793126, 786754, 795791, 799635, 796244, 781923, 821677, 801125, 814248, 811161	136	101	13528	12.8031	4.39484e-07	4.39484e-07	5.45002e-07
GOTERM_BP_FAT	GO:0006091~generation of precursor metabolites and energy	19	12.8378	2.03378e-09	796931, 797595, 787383, 812048, 794852, 794884, 818987, 801768, 820161, 803359, 813015, 822387, 783039, 813329, 821792, 777438, 792407, 788119, 799188	136	313	13528	6.03815	2.68255e-06	1.34128e-06	3.32662e-06
GOTERM_BP_FAT	GO:0006096~glycolysis	9	6.08108	1.80952e-08	797595, 812048, 783039, 813329, 821792, 777438, 794884, 801768, 792407	136	47	13528	19.0476	2.38673e-05	7.95583e-06	2.95981e-05
GOTERM_BP_FAT	GO:0046365~monosaccharide catabolic process	10	6.75676	3.31184e-08	797595, 812048, 783039, 813329, 802330, 821792, 777438, 794884, 801768, 792407	136	71	13528	14.0099	4.36823e-05	1.09207e-05	5.41713e-05
GOTERM_BP_FAT	GO:0030036~actin cytoskeleton organization	15	10.1351	5.63588e-08	795829, 784977, 808953, 794878, 801440, 825820, 822491, 795963, 789529, 815528, 786096, 794115, 805574, 772395, 792407	136	226	13528	6.60203	7.43344e-05	1.48673e-05	9.21852e-05
GOTERM_BP_FAT	GO:0006007~glucose catabolic process	9	6.08108	1.006e-07	797595, 812048, 783039, 813329, 821792, 777438, 794884, 801768, 792407	136	58	13528	15.4351	0.000132682	2.21149e-05	0.000164549
GOTERM_BP_FAT	GO:0046164~alcohol catabolic process	10	6.75676	1.06658e-07	797595, 812048, 783039, 813329, 802330, 821792, 777438, 794884, 801768, 792407	136	81	13528	12.2803	0.000140672	2.00971e-05	0.000174458
GOTERM_BP_FAT	GO:0030029~actin filament-based process	15	10.1351	1.25318e-07	795829, 784977, 808953, 794878, 801440, 825820, 822491, 795963, 789529, 815528, 786096, 794115, 805574, 772395, 792407	136	241	13528	6.19112	0.000165281	2.06617e-05	0.000204981
GOTERM_BP_FAT	GO:0044275~cellular carbohydrate catabolic process	10	6.75676	1.62759e-07	797595, 812048, 783039, 813329, 802330, 821792, 777438, 794884, 801768, 792407	136	85	13528	11.7024	0.000214656	2.38529e-05	0.000266222
GOTERM_BP_FAT	GO:0019320~hexose catabolic process	9	6.08108	4.0026e-07	797595, 812048, 783039, 813329, 821792, 777438, 794884, 801768, 792407	136	69	13528	12.9744	0.000527804	5.27929e-05	0.000654698
GOTERM_BP_FAT	GO:0006412~translation	16	10.8108	1.06443e-06	825605, 796817, 793126, 799749, 786754, 795791, 795388, 799635, 796244, 781923, 821677, 775824, 801125, 814248, 811161, 820495	136	331	13528	4.80825	0.001403	0.000127627	0.00174106
GOTERM_BP_FAT	GO:0016052~carbohydrate catabolic process	10	6.75676	1.37745e-06	797595, 812048, 783039, 813329, 802330, 821792, 777438, 794884, 801768, 792407	136	109	13528	9.12574	0.00181521	0.000151393	0.00225305
GOTERM_BP_FAT	GO:0007010~cytoskeleton organization	18	12.1622	1.56838e-06	795829, 822573, 784977, 808953, 794878, 801440, 772317, 825820, 822491, 795963, 789529, 815528, 786096, 794115, 801728, 805574, 772395, 792407	136	436	13528	4.10658	0.00206655	0.000159117	0.00256534
GOTERM_BP_FAT	GO:0006928~cell motion	16	10.8108	7.83904e-05	799778, 784977, 817614, 814359, 794878, 825820, 820161, 795963, 789529, 794115, 811889, 805574, 791118, 817654, 791781, 799188	136	475	13528	3.35059	0.0982347	0.00735857	0.128145
GOTERM_BP_FAT	GO:0016044~membrane organization	14	9.45946	0.00011213	823976, 795829, 785761, 798427, 820161, 795963, 805919, 783500, 805574, 782125, 794622, 826073, 817654, 806127	136	381	13528	3.65509	0.137489	0.00981202	0.183251
GOTERM_BP_FAT	GO:0006006~glucose metabolic process	9	6.08108	0.000146861	797595, 812048, 783039, 813329, 821792, 777438, 794884, 801768, 792407	136	153	13528	5.85121	0.176114	0.0120347	0.239947
GOTERM_BP_FAT	GO:0043066~negative regulation of apoptosis	13	8.78378	0.000220518	815675, 817614, 817433, 809635, 791999, 794115, 782125, 818455, 791118, 824963, 817654, 820495, 804644	136	354	13528	3.65287	0.252406	0.0169659	0.360088
GOTERM_BP_FAT	GO:0043069~negative regulation of programmed cell death	13	8.78378	0.000250808	815675, 817614, 817433, 809635, 791999, 794115, 782125, 818455, 791118, 824963, 817654, 820495, 804644	136	359	13528	3.602	0.281692	0.018213	0.409454
GOTERM_BP_FAT	GO:0060548~negative regulation of cell death	13	8.78378	0.000257273	815675, 817614, 817433, 809635, 791999, 794115, 782125, 818455, 791118, 824963, 817654, 820495, 804644	136	360	13528	3.59199	0.287793	0.0177039	0.419988
GOTERM_BP_FAT	GO:0005996~monosaccharide metabolic process	10	6.75676	0.000383651	797595, 812048, 783039, 813329, 802330, 821792, 777438, 794884, 801768, 792407	136	222	13528	4.48066	0.397177	0.0249891	0.625687
GOTERM_BP_FAT	GO:0042981~regulation of apoptosis	20	13.5135	0.000390257	815675, 808953, 817614, 797325, 817433, 809635, 775480, 791999, 783770, 786096, 794115, 782125, 818455, 791118, 824963, 793142, 791792, 820495, 817654, 804644	136	804	13528	2.47439	0.402409	0.0242185	0.636428
GOTERM_BP_FAT	GO:0043067~regulation of programmed cell death	20	13.5135	0.000441158	815675, 808953, 817614, 797325, 817433, 809635, 775480, 791999, 783770, 786096, 794115, 782125, 818455, 791118, 824963, 793142, 791792, 820495, 817654, 804644	136	812	13528	2.45001	0.441229	0.0261084	0.719156
GOTERM_BP_FAT	GO:0010941~regulation of cell death	20	13.5135	0.000461686	815675, 808953, 817614, 797325, 817433, 809635, 775480, 791999, 783770, 786096, 794115, 782125, 818455, 791118, 824963, 793142, 791792, 820495, 817654, 804644	136	815	13528	2.441	0.456162	0.0261352	0.752501
GOTERM_BP_FAT	GO:0019318~hexose metabolic process	9	6.08108	0.000678684	797595, 812048, 783039, 813329, 821792, 777438, 794884, 801768, 792407	136	192	13528	4.66268	0.591592	0.0366245	1.10435
GOTERM_BP_FAT	GO:0006986~response to unfolded protein	6	4.05405	0.000705797	823976, 785761, 824963, 800499, 791792, 820495	136	71	13528	8.40597	0.605949	0.0365657	1.14823
GOTERM_BP_FAT	GO:0007015~actin filament organization	6	4.05405	0.000752466	786096, 794115, 808953, 801440, 825820, 792407	136	72	13528	8.28922	0.62949	0.0374676	1.22371
GOTERM_BP_FAT	GO:0046907~intracellular transport	17	11.4865	0.000843791	802976, 823976, 787383, 785761, 797325, 794878, 791999, 798427, 815359, 820893, 795963, 805919, 783500, 823629, 815903, 794622, 823660	136	657	13528	2.57382	0.67157	0.0403994	1.37127
GOTERM_BP_FAT	GO:0007162~negative regulation of cell adhesion	5	3.37838	0.000865751	791118, 817654, 803900, 791781, 820161	136	43	13528	11.5663	0.680954	0.0399796	1.40672
GOTERM_BP_FAT	GO:0030010~establishment of cell polarity	4	2.7027	0.000978454	795963, 794115, 794360, 794878	136	20	13528	19.8941	0.725063	0.0435479	1.58847
GOTERM_BP_FAT	GO:0006916~anti-apoptosis	9	6.08108	0.00107198	815675, 794115, 817614, 818455, 817433, 791118, 817654, 791999, 804644	136	206	13528	4.3458	0.757001	0.046062	1.73906
GOTERM_BP_FAT	GO:0007163~establishment or maintenance of cell polarity	5	3.37838	0.00141934	795963, 794115, 805574, 794360, 794878	136	49	13528	10.1501	0.846406	0.0586438	2.29647
GOTERM_BP_FAT	GO:0016192~vesicle-mediated transport	15	10.1351	0.00183105	823976, 795829, 795388, 791999, 798427, 820161, 805919, 783500, 805574, 782125, 794622, 814242, 826073, 817654, 806127	136	576	13528	2.59038	0.910844	0.0727599	2.95328
GOTERM_BP_FAT	GO:0006457~protein folding	8	5.40541	0.0019816	784769, 823976, 785761, 796391, 824963, 791792, 820495, 804644	136	177	13528	4.49585	0.926929	0.076221	3.19242
GOTERM_BP_FAT	GO:0009109~coenzyme catabolic process	4	2.7027	0.00213614	796931, 794852, 821792, 784216	136	26	13528	15.3032	0.940429	0.0796106	3.43733
GOTERM_BP_FAT	GO:0032269~negative regulation of cellular protein metabolic process	8	5.40541	0.0021793	822964, 784081, 797325, 775480, 817654, 785147, 775955, 811696	136	180	13528	4.42092	0.943733	0.0789291	3.50562
GOTERM_BP_FAT	GO:0051248~negative regulation of protein metabolic process	8	5.40541	0.00269995	822964, 784081, 797325, 775480, 817654, 785147, 775955, 811696	136	187	13528	4.25543	0.971733	0.0943089	4.32589
GOTERM_BP_FAT	GO:0008064~regulation of actin polymerization or depolymerization	5	3.37838	0.00318852	822491, 802976, 815528, 794115, 825820	136	61	13528	8.15333	0.985189	0.107606	5.08965
GOTERM_BP_FAT	GO:0009259~ribonucleotide metabolic process	7	4.72973	0.00354317	787383, 782125, 793981, 802330, 818987, 792407, 820161	136	147	13528	4.73669	0.990737	0.115916	5.64048
GOTERM_BP_FAT	GO:0051187~cofactor catabolic process	4	2.7027	0.00356132	796931, 794852, 821792, 784216	136	31	13528	12.8349	0.990957	0.113665	5.66859
GOTERM_BP_FAT	GO:0030832~regulation of actin filament length	5	3.37838	0.00358421	822491, 802976, 815528, 794115, 825820	136	63	13528	7.89449	0.991227	0.111661	5.70404
GOTERM_BP_FAT	GO:0051235~maintenance of location	5	3.37838	0.00379403	822491, 789529, 815528, 797325, 804644	136	64	13528	7.77114	0.993355	0.115107	6.02829
GOTERM_BP_FAT	GO:0051789~response to protein stimulus	6	4.05405	0.00433367	823976, 785761, 824963, 800499, 791792, 820495	136	107	13528	5.57779	0.996748	0.127501	6.85747
GOTERM_BP_FAT	GO:0055114~oxidation reduction	15	10.1351	0.00466733	813997, 812048, 793882, 787596, 794884, 801768, 784216, 812449, 803359, 819709, 783505, 807457, 821792, 788119, 799188	136	639	13528	2.33499	0.99791	0.133682	7.3667
GOTERM_BP_FAT	GO:0009060~aerobic respiration	4	2.7027	0.00503729	796931, 794852, 821792, 788119	136	35	13528	11.3681	0.99872	0.140484	7.9283
GOTERM_BP_FAT	GO:0010033~response to organic substance	16	10.8108	0.00550925	823976, 784511, 785761, 800499, 775480, 803359, 809178, 794115, 819709, 782125, 818455, 824963, 791792, 817654, 820495, 791781	136	721	13528	2.20739	0.999315	0.149498	8.64007
GOTERM_BP_FAT	GO:0016477~cell migration	9	6.08108	0.0064653	795963, 799778, 794115, 784977, 805574, 794878, 817654, 791781, 820161	136	276	13528	3.24361	0.999808	0.169716	10.0661
GOTERM_BP_FAT	GO:0010324~membrane invagination	8	5.40541	0.0065441	795829, 805574, 782125, 794622, 826073, 817654, 806127, 820161	136	220	13528	3.61711	0.999827	0.168277	10.1827
GOTERM_BP_FAT	GO:0006897~endocytosis	8	5.40541	0.0065441	795829, 805574, 782125, 794622, 826073, 817654, 806127, 820161	136	220	13528	3.61711	0.999827	0.168277	10.1827
GOTERM_BP_FAT	GO:0008104~protein localization	18	12.1622	0.00673118	809511, 802976, 797325, 794878, 791999, 798427, 815359, 820893, 822491, 789529, 805919, 815528, 786096, 783500, 815903, 823660, 814242, 804644	136	882	13528	2.03001	0.999865	0.169388	10.459
GOTERM_BP_FAT	GO:0019748~secondary metabolic process	5	3.37838	0.00800167	812048, 785060, 819709, 813329, 821792	136	79	13528	6.29561	0.999975	0.194473	12.3141
GOTERM_BP_FAT	GO:0009260~ribonucleotide biosynthetic process	6	4.05405	0.00802863	787383, 782125, 793981, 818987, 792407, 820161	136	124	13528	4.81309	0.999976	0.191561	12.353
GOTERM_BP_FAT	GO:0048870~cell motility	9	6.08108	0.0118639	795963, 799778, 794115, 784977, 805574, 794878, 817654, 791781, 820161	136	307	13528	2.91608	1	0.265575	17.7344
GOTERM_BP_FAT	GO:0051674~localization of cell	9	6.08108	0.0118639	795963, 799778, 794115, 784977, 805574, 794878, 817654, 791781, 820161	136	307	13528	2.91608	1	0.265575	17.7344
GOTERM_BP_FAT	GO:0030155~regulation of cell adhesion	6	4.05405	0.0120296	814144, 791118, 817654, 803900, 791781, 820161	136	137	13528	4.35638	1	0.264338	17.9596
GOTERM_BP_FAT	GO:0032956~regulation of actin cytoskeleton organization	5	3.37838	0.0120515	822491, 802976, 815528, 794115, 825820	136	89	13528	5.58824	1	0.260473	17.9894
GOTERM_BP_FAT	GO:0045185~maintenance of protein location	4	2.7027	0.012119	822491, 789529, 815528, 797325	136	48	13528	8.28922	1	0.25757	18.0811
GOTERM_BP_FAT	GO:0009132~nucleoside diphosphate metabolic process	3	2.02703	0.012188	782125, 802330, 820161	136	17	13528	17.5536	1	0.254787	18.1745
GOTERM_BP_FAT	GO:0043200~response to amino acid stimulus	3	2.02703	0.012188	794115, 775480, 820495	136	17	13528	17.5536	1	0.254787	18.1745
GOTERM_BP_FAT	GO:0006886~intracellular protein transport	10	6.75676	0.0126594	805919, 802976, 783500, 797325, 815903, 823660, 815359, 798427, 791999, 820893	136	374	13528	2.65964	1	0.259239	18.811
GOTERM_BP_FAT	GO:0032970~regulation of actin filament-based process	5	3.37838	0.0134813	822491, 802976, 815528, 794115, 825820	136	92	13528	5.40601	1	0.269543	19.9094
GOTERM_BP_FAT	GO:0051129~negative regulation of cellular component organization	6	4.05405	0.0138749	822491, 802976, 815528, 791118, 817654, 791781	136	142	13528	4.20298	1	0.27221	20.4304
GOTERM_BP_FAT	GO:0006898~receptor-mediated endocytosis	4	2.7027	0.0158347	795829, 805574, 826073, 820161	136	53	13528	7.50721	1	0.300109	22.9779
GOTERM_BP_FAT	GO:0009206~purine ribonucleoside triphosphate biosynthetic process	5	3.37838	0.0166545	787383, 782125, 818987, 792407, 820161	136	98	13528	5.07503	1	0.308717	24.0207
GOTERM_BP_FAT	GO:0009201~ribonucleoside triphosphate biosynthetic process	5	3.37838	0.017225	787383, 782125, 818987, 792407, 820161	136	99	13528	5.02377	1	0.313192	24.7385
GOTERM_BP_FAT	GO:0009145~purine nucleoside triphosphate biosynthetic process	5	3.37838	0.017225	787383, 782125, 818987, 792407, 820161	136	99	13528	5.02377	1	0.313192	24.7385
GOTERM_BP_FAT	GO:0006732~coenzyme metabolic process	6	4.05405	0.0185851	796931, 812048, 813329, 794852, 821792, 784216	136	153	13528	3.90081	1	0.329079	26.4242
GOTERM_BP_FAT	GO:0009142~nucleoside triphosphate biosynthetic process	5	3.37838	0.0190093	787383, 782125, 818987, 792407, 820161	136	102	13528	4.87601	1	0.330898	26.9426
GOTERM_BP_FAT	GO:0043161~proteasomal ubiquitin-dependent protein catabolic process	5	3.37838	0.0190093	822964, 784081, 785147, 775955, 804644	136	102	13528	4.87601	1	0.330898	26.9426
GOTERM_BP_FAT	GO:0010498~proteasomal protein catabolic process	5	3.37838	0.0190093	822964, 784081, 785147, 775955, 804644	136	102	13528	4.87601	1	0.330898	26.9426
GOTERM_BP_FAT	GO:0015031~protein transport	15	10.1351	0.0198622	809511, 802976, 797325, 794878, 791999, 798427, 815359, 820893, 805919, 786096, 783500, 815903, 823660, 814242, 804644	136	762	13528	1.95808	1	0.338647	27.9747
GOTERM_BP_FAT	GO:0045861~negative regulation of proteolysis	3	2.02703	0.0200407	775480, 817654, 811696	136	22	13528	13.5642	1	0.336882	28.189
GOTERM_BP_FAT	GO:0016331~morphogenesis of embryonic epithelium	4	2.7027	0.0201223	794115, 772395, 794360, 791411	136	58	13528	6.86004	1	0.333851	28.2867
GOTERM_BP_FAT	GO:0045184~establishment of protein localization	15	10.1351	0.0213033	809511, 802976, 797325, 794878, 791999, 798427, 815359, 820893, 805919, 786096, 783500, 815903, 823660, 814242, 804644	136	769	13528	1.94026	1	0.345524	29.6875
GOTERM_BP_FAT	GO:0006099~tricarboxylic acid cycle	3	2.02703	0.0218077	796931, 794852, 821792	136	23	13528	12.9744	1	0.347984	30.2779
GOTERM_BP_FAT	GO:0046356~acetyl-CoA catabolic process	3	2.02703	0.0218077	796931, 794852, 821792	136	23	13528	12.9744	1	0.347984	30.2779
GOTERM_BP_FAT	GO:0034613~cellular protein localization	10	6.75676	0.0219887	805919, 802976, 783500, 797325, 815903, 823660, 815359, 798427, 791999, 820893	136	411	13528	2.42021	1	0.346247	30.4886
GOTERM_BP_FAT	GO:0070727~cellular macromolecule localization	10	6.75676	0.0229172	805919, 802976, 783500, 797325, 815903, 823660, 815359, 798427, 791999, 820893	136	414	13528	2.40267	1	0.353932	31.5602
GOTERM_BP_FAT	GO:0001101~response to acid	3	2.02703	0.0236368	794115, 775480, 820495	136	24	13528	12.4338	1	0.358782	32.38
GOTERM_BP_FAT	GO:0045765~regulation of angiogenesis	4	2.7027	0.024987	775623, 796346, 817654, 804645	136	63	13528	6.31559	1	0.370962	33.8934
GOTERM_BP_FAT	GO:0009261~ribonucleotide catabolic process	3	2.02703	0.0255267	787383, 802330, 820161	136	25	13528	11.9365	1	0.373256	34.4894
GOTERM_BP_FAT	GO:0051436~negative regulation of ubiquitin-protein ligase activity during mitotic cell cycle	4	2.7027	0.0270946	822964, 784081, 785147, 775955	136	65	13528	6.12127	1	0.387133	36.1924
GOTERM_BP_FAT	GO:0031145~anaphase-promoting complex-dependent proteasomal ubiquitin-dependent protein catabolic process	4	2.7027	0.0270946	822964, 784081, 785147, 775955	136	65	13528	6.12127	1	0.387133	36.1924
GOTERM_BP_FAT	GO:0051352~negative regulation of ligase activity	4	2.7027	0.0292944	822964, 784081, 785147, 775955	136	67	13528	5.93854	1	0.407194	38.5117
GOTERM_BP_FAT	GO:0044270~nitrogen compound catabolic process	4	2.7027	0.0292944	787383, 802330, 784216, 820161	136	67	13528	5.93854	1	0.407194	38.5117
GOTERM_BP_FAT	GO:0051444~negative regulation of ubiquitin-protein ligase activity	4	2.7027	0.0292944	822964, 784081, 785147, 775955	136	67	13528	5.93854	1	0.407194	38.5117
GOTERM_BP_FAT	GO:0030834~regulation of actin filament depolymerization	3	2.02703	0.0294831	802976, 794115, 825820	136	27	13528	11.0523	1	0.405112	38.7069
GOTERM_BP_FAT	GO:0009205~purine ribonucleoside triphosphate metabolic process	5	3.37838	0.0296191	787383, 782125, 818987, 792407, 820161	136	117	13528	4.25088	1	0.402522	38.8472
GOTERM_BP_FAT	GO:0009152~purine ribonucleotide biosynthetic process	5	3.37838	0.0296191	787383, 782125, 818987, 792407, 820161	136	117	13528	4.25088	1	0.402522	38.8472
GOTERM_BP_FAT	GO:0030836~positive regulation of actin filament depolymerization	2	1.35135	0.0296423	794115, 825820	136	3	13528	66.3137	1	0.398807	38.8712
GOTERM_BP_FAT	GO:0051437~positive regulation of ubiquitin-protein ligase activity during mitotic cell cycle	4	2.7027	0.0304288	822964, 784081, 785147, 775955	136	68	13528	5.85121	1	0.403058	39.6765
GOTERM_BP_FAT	GO:0009199~ribonucleoside triphosphate metabolic process	5	3.37838	0.0304289	787383, 782125, 818987, 792407, 820161	136	118	13528	4.21486	1	0.399197	39.6766
GOTERM_BP_FAT	GO:0031400~negative regulation of protein modification process	5	3.37838	0.0312517	822964, 784081, 797325, 785147, 775955	136	119	13528	4.17944	1	0.403707	40.5085
GOTERM_BP_FAT	GO:0030837~negative regulation of actin filament polymerization	3	2.02703	0.031547	822491, 802976, 815528	136	28	13528	10.6576	1	0.402871	40.8045
GOTERM_BP_FAT	GO:0006839~mitochondrial transport	4	2.7027	0.0315861	787383, 823629, 785761, 791999	136	69	13528	5.76641	1	0.399535	40.8435
GOTERM_BP_FAT	GO:0044093~positive regulation of molecular function	12	8.10811	0.0325556	786096, 822964, 805574, 784081, 782125, 797325, 824963, 826073, 791792, 817654, 785147, 775955	136	586	13528	2.03694	1	0.405306	41.8049
GOTERM_BP_FAT	GO:0051443~positive regulation of ubiquitin-protein ligase activity	4	2.7027	0.0327662	822964, 784081, 785147, 775955	136	70	13528	5.68403	1	0.403676	42.0117
GOTERM_BP_FAT	GO:0032272~negative regulation of protein polymerization	3	2.02703	0.0336662	822491, 802976, 815528	136	29	13528	10.2901	1	0.408585	42.888
GOTERM_BP_FAT	GO:0009144~purine nucleoside triphosphate metabolic process	5	3.37838	0.0337983	787383, 782125, 818987, 792407, 820161	136	122	13528	4.07666	1	0.406236	43.0156
GOTERM_BP_FAT	GO:0051439~regulation of ubiquitin-protein ligase activity during mitotic cell cycle	4	2.7027	0.0339691	822964, 784081, 785147, 775955	136	71	13528	5.60398	1	0.404289	43.1802
GOTERM_BP_FAT	GO:0051351~positive regulation of ligase activity	4	2.7027	0.0364431	822964, 784081, 785147, 775955	136	73	13528	5.45044	1	0.423155	45.5141
GOTERM_BP_FAT	GO:0031397~negative regulation of protein ubiquitination	4	2.7027	0.037714	822964, 784081, 785147, 775955	136	74	13528	5.37679	1	0.430736	46.6777
GOTERM_BP_FAT	GO:0006084~acetyl-CoA metabolic process	3	2.02703	0.0380656	796931, 794852, 821792	136	31	13528	9.62619	1	0.430227	46.9955
GOTERM_BP_FAT	GO:0009165~nucleotide biosynthetic process	6	4.05405	0.0386412	787383, 782125, 793981, 818987, 792407, 820161	136	186	13528	3.20873	1	0.431631	47.5119
GOTERM_BP_FAT	GO:0043032~positive regulation of macrophage activation	2	1.35135	0.039328	824963, 817654	136	4	13528	49.7353	1	0.433934	48.1219
GOTERM_BP_FAT	GO:0051045~negative regulation of membrane protein ectodomain proteolysis	2	1.35135	0.039328	775480, 811696	136	4	13528	49.7353	1	0.433934	48.1219
GOTERM_BP_FAT	GO:0046700~heterocycle catabolic process	4	2.7027	0.0416612	787383, 802330, 784216, 820161	136	77	13528	5.1673	1	0.449601	50.1448
GOTERM_BP_FAT	GO:0009141~nucleoside triphosphate metabolic process	5	3.37838	0.0421467	787383, 782125, 818987, 792407, 820161	136	131	13528	3.79659	1	0.450014	50.5563
GOTERM_BP_FAT	GO:0014020~primary neural tube formation	3	2.02703	0.0426711	794115, 772395, 794360	136	33	13528	9.04278	1	0.450727	50.9973
GOTERM_BP_FAT	GO:0051438~regulation of ubiquitin-protein ligase activity	4	2.7027	0.0430214	822964, 784081, 785147, 775955	136	78	13528	5.10106	1	0.450067	51.2898
GOTERM_BP_FAT	GO:0034404~nucleobase, nucleoside and nucleotide biosynthetic process	6	4.05405	0.0441202	787383, 782125, 793981, 818987, 792407, 820161	136	193	13528	3.09235	1	0.455191	52.1965
GOTERM_BP_FAT	GO:0034654~nucleobase, nucleoside, nucleotide and nucleic acid biosynthetic process	6	4.05405	0.0441202	787383, 782125, 793981, 818987, 792407, 820161	136	193	13528	3.09235	1	0.455191	52.1965
GOTERM_BP_FAT	GO:0031333~negative regulation of protein complex assembly	3	2.02703	0.0450481	822491, 802976, 815528	136	34	13528	8.77682	1	0.458886	52.95
GOTERM_BP_FAT	GO:0001666~response to hypoxia	5	3.37838	0.0451665	814144, 786096, 817654, 791781, 804644	136	134	13528	3.71159	1	0.456442	53.0453
GOTERM_BP_FAT	GO:0051186~cofactor metabolic process	6	4.05405	0.0457671	796931, 812048, 813329, 794852, 821792, 784216	136	195	13528	3.06063	1	0.457627	53.5261
GOTERM_BP_FAT	GO:0051493~regulation of cytoskeleton organization	5	3.37838	0.0472246	822491, 802976, 815528, 794115, 825820	136	136	13528	3.65701	1	0.465043	54.6736
GOTERM_BP_FAT	GO:0051340~regulation of ligase activity	4	2.7027	0.0472344	822964, 784081, 785147, 775955	136	81	13528	4.91213	1	0.461855	54.6812
GOTERM_BP_FAT	GO:0032268~regulation of cellular protein metabolic process	10	6.75676	0.0478418	822964, 775824, 784081, 797325, 794852, 775480, 817654, 785147, 775955, 811696	136	474	13528	2.09854	1	0.463	55.1515
GOTERM_BP_FAT	GO:0042026~protein refolding	2	1.35135	0.0489176	785761, 824963	136	5	13528	39.7882	1	0.467428	55.9732
GOTERM_BP_FAT	GO:0051895~negative regulation of focal adhesion formation	2	1.35135	0.0489176	817654, 791781	136	5	13528	39.7882	1	0.467428	55.9732
GOTERM_BP_FAT	GO:0009150~purine ribonucleotide metabolic process	5	3.37838	0.0494234	787383, 782125, 818987, 792407, 820161	136	138	13528	3.60401	1	0.467788	56.3546
GOTERM_BP_FAT	GO:0031398~positive regulation of protein ubiquitination	4	2.7027	0.051643	822964, 784081, 785147, 775955	136	84	13528	4.73669	1	0.479849	57.992
GOTERM_BP_FAT	GO:0070482~response to oxygen levels	5	3.37838	0.0526717	814144, 786096, 817654, 791781, 804644	136	141	13528	3.52733	1	0.483582	58.7312
GOTERM_BP_FAT	GO:0044087~regulation of cellular component biogenesis	5	3.37838	0.0537962	822491, 802976, 815528, 817654, 791781	136	142	13528	3.50249	1	0.487856	59.5252
GOTERM_BP_FAT	GO:0032535~regulation of cellular component size	7	4.72973	0.0542944	822491, 802976, 815528, 794115, 783039, 825820, 812449	136	271	13528	2.56935	1	0.487974	59.8723
GOTERM_BP_FAT	GO:0014075~response to amine stimulus	3	2.02703	0.0576283	794115, 775480, 820495	136	39	13528	7.65158	1	0.506047	62.1246
GOTERM_BP_FAT	GO:0042989~sequestering of actin monomers	2	1.35135	0.0584123	822491, 815528	136	6	13528	33.1569	1	0.507774	62.6367
GOTERM_BP_FAT	GO:0043277~apoptotic cell clearance	2	1.35135	0.0584123	826073, 817654	136	6	13528	33.1569	1	0.507774	62.6367
GOTERM_BP_FAT	GO:0006754~ATP biosynthetic process	4	2.7027	0.0594163	787383, 818987, 792407, 820161	136	89	13528	4.47059	1	0.510807	63.2831
GOTERM_BP_FAT	GO:0006769~nicotinamide metabolic process	3	2.02703	0.0602754	812048, 813329, 821792	136	40	13528	7.46029	1	0.512907	63.8278
GOTERM_BP_FAT	GO:0015985~energy coupled proton transport, down electrochemical gradient	3	2.02703	0.0602754	787383, 818987, 820161	136	40	13528	7.46029	1	0.512907	63.8278
GOTERM_BP_FAT	GO:0046496~nicotinamide nucleotide metabolic process	3	2.02703	0.0602754	812048, 813329, 821792	136	40	13528	7.46029	1	0.512907	63.8278
GOTERM_BP_FAT	GO:0015986~ATP synthesis coupled proton transport	3	2.02703	0.0602754	787383, 818987, 820161	136	40	13528	7.46029	1	0.512907	63.8278
GOTERM_BP_FAT	GO:0001841~neural tube formation	3	2.02703	0.0602754	794115, 772395, 794360	136	40	13528	7.46029	1	0.512907	63.8278
GOTERM_BP_FAT	GO:0001525~angiogenesis	5	3.37838	0.0608162	788455, 794878, 817654, 791781, 820161	136	148	13528	3.36049	1	0.513076	64.1668
GOTERM_BP_FAT	GO:0006164~purine nucleotide biosynthetic process	5	3.37838	0.0608162	787383, 782125, 818987, 792407, 820161	136	148	13528	3.36049	1	0.513076	64.1668
GOTERM_BP_FAT	GO:0050818~regulation of coagulation	3	2.02703	0.0629636	818455, 796346, 817654	136	41	13528	7.27834	1	0.522634	65.4837
GOTERM_BP_FAT	GO:0000910~cytokinesis	3	2.02703	0.0629636	794115, 794878, 825820	136	41	13528	7.27834	1	0.522634	65.4837
GOTERM_BP_FAT	GO:0009820~alkaloid metabolic process	3	2.02703	0.0629636	812048, 813329, 821792	136	41	13528	7.27834	1	0.522634	65.4837
GOTERM_BP_FAT	GO:0010605~negative regulation of macromolecule metabolic process	13	8.78378	0.0629655	783393, 797325, 775480, 775955, 820893, 783770, 822964, 783039, 784081, 793142, 817654, 785147, 811696	136	734	13528	1.76174	1	0.519618	65.4848
GOTERM_BP_FAT	GO:0006605~protein targeting	6	4.05405	0.0642443	802976, 797325, 815903, 823660, 791999, 820893	136	215	13528	2.77592	1	0.523947	66.2473
GOTERM_BP_FAT	GO:0006090~pyruvate metabolic process	3	2.02703	0.0656918	812048, 813329, 794884	136	42	13528	7.10504	1	0.529118	67.0912
GOTERM_BP_FAT	GO:0019362~pyridine nucleotide metabolic process	3	2.02703	0.0656918	812048, 813329, 821792	136	42	13528	7.10504	1	0.529118	67.0912
GOTERM_BP_FAT	GO:0051131~chaperone-mediated protein complex assembly	2	1.35135	0.0678128	785761, 824963	136	7	13528	28.4202	1	0.537844	68.2921
GOTERM_BP_FAT	GO:0043243~positive regulation of protein complex disassembly	2	1.35135	0.0678128	794115, 825820	136	7	13528	28.4202	1	0.537844	68.2921
GOTERM_BP_FAT	GO:0001838~embryonic epithelial tube formation	3	2.02703	0.0684589	794115, 772395, 794360	136	43	13528	6.93981	1	0.538389	68.6497
GOTERM_BP_FAT	GO:0035148~tube lumen formation	3	2.02703	0.0712641	794115, 772395, 794360	136	44	13528	6.78209	1	0.550357	70.1587
GOTERM_BP_FAT	GO:0045333~cellular respiration	4	2.7027	0.0729195	796931, 794852, 821792, 788119	136	97	13528	4.10188	1	0.556001	71.0169
GOTERM_BP_FAT	GO:0006119~oxidative phosphorylation	4	2.7027	0.0746963	787383, 818987, 820161, 788119	136	98	13528	4.06002	1	0.562112	71.9122
GOTERM_BP_FAT	GO:0043085~positive regulation of catalytic activity	10	6.75676	0.0761283	822964, 805574, 784081, 797325, 824963, 826073, 791792, 817654, 785147, 775955	136	520	13528	1.9129	1	0.566355	72.6149
GOTERM_BP_FAT	GO:0060429~epithelium development	6	4.05405	0.0770786	809178, 794115, 817614, 772395, 794360, 791411	136	227	13528	2.62918	1	0.568148	73.072
GOTERM_BP_FAT	GO:0006108~malate metabolic process	2	1.35135	0.0771202	796931, 821792	136	8	13528	24.8676	1	0.565486	73.0918
GOTERM_BP_FAT	GO:0051893~regulation of focal adhesion formation	2	1.35135	0.0771202	817654, 791781	136	8	13528	24.8676	1	0.565486	73.0918
GOTERM_BP_FAT	GO:0031396~regulation of protein ubiquitination	4	2.7027	0.0783072	822964, 784081, 785147, 775955	136	100	13528	3.97882	1	0.56841	73.6524
GOTERM_BP_FAT	GO:0002009~morphogenesis of an epithelium	4	2.7027	0.0801411	794115, 772395, 794360, 791411	136	101	13528	3.93943	1	0.574346	74.4969
GOTERM_BP_FAT	GO:0043062~extracellular structure organization	5	3.37838	0.0803725	805802, 779124, 800499, 803900, 804645	136	163	13528	3.05125	1	0.572633	74.6016
GOTERM_BP_FAT	GO:0007264~small GTPase mediated signal transduction	7	4.72973	0.0850461	809511, 794115, 774485, 797325, 791118, 814242, 820893	136	305	13528	2.28293	1	0.591361	76.6325
GOTERM_BP_FAT	GO:0030198~extracellular matrix organization	4	2.7027	0.0857537	779124, 800499, 803900, 804645	136	104	13528	3.82579	1	0.591749	76.9263
GOTERM_BP_FAT	GO:0034220~ion transmembrane transport	3	2.02703	0.0858238	787383, 818987, 820161	136	49	13528	6.09004	1	0.589302	76.9552
GOTERM_BP_FAT	GO:0007265~Ras protein signal transduction	4	2.7027	0.0876611	794115, 774485, 797325, 791118	136	105	13528	3.78936	1	0.594672	77.7012
GOTERM_BP_FAT	GO:0046034~ATP metabolic process	4	2.7027	0.0876611	787383, 818987, 792407, 820161	136	105	13528	3.78936	1	0.594672	77.7012
GOTERM_BP_FAT	GO:0043244~regulation of protein complex disassembly	3	2.02703	0.0918788	802976, 794115, 825820	136	51	13528	5.85121	1	0.610013	79.3289
GOTERM_BP_FAT	GO:0009166~nucleotide catabolic process	3	2.02703	0.0918788	787383, 802330, 820161	136	51	13528	5.85121	1	0.610013	79.3289
GOTERM_BP_FAT	GO:0006511~ubiquitin-dependent protein catabolic process	6	4.05405	0.0949255	822964, 784081, 785147, 791411, 775955, 804644	136	242	13528	2.46621	1	0.619897	80.4345
GOTERM_BP_FAT	GO:0006733~oxidoreduction coenzyme metabolic process	3	2.02703	0.0949521	812048, 813329, 821792	136	52	13528	5.73869	1	0.617312	80.4439
GOTERM_BP_FAT	GO:0016050~vesicle organization	3	2.02703	0.0949521	805919, 794622, 798427	136	52	13528	5.73869	1	0.617312	80.4439
GOTERM_BP_FAT	GO:0009185~ribonucleoside diphosphate metabolic process	2	1.35135	0.0954592	802330, 820161	136	10	13528	19.8941	1	0.616697	80.6223
GOTERM_BP_FAT	GO:0051653~spindle localization	2	1.35135	0.0954592	795963, 794878	136	10	13528	19.8941	1	0.616697	80.6223
GOTERM_BP_FAT	GO:0051293~establishment of spindle localization	2	1.35135	0.0954592	795963, 794878	136	10	13528	19.8941	1	0.616697	80.6223
GOTERM_BP_FAT	GO:0001953~negative regulation of cell-matrix adhesion	2	1.35135	0.0954592	817654, 791781	136	10	13528	19.8941	1	0.616697	80.6223
GOTERM_BP_FAT	GO:0007568~aging	4	2.7027	0.0974627	796346, 807457, 826073, 775480	136	110	13528	3.61711	1	0.62208	81.3126
GOTERM_BP_FAT	GO:0030162~regulation of proteolysis	3	2.02703	0.0980547	775480, 817654, 811696	136	53	13528	5.63041	1	0.62179	81.5121
